# Supplementary material for: Epigenome-wide gene–age interaction analysis reveals reversed effects of PRODH DNA methylation on survival between young and elderly early-stage NSCLC patients
Source: publisher site journal article supplement (doi:10.18632/aging.103284), 2020-06-08
Supplement: Supplementary file [file aging-v12i11-103284-supplementary-material-SD2.pdf]

## SUPPLEMENTARY TABLES

**Supplementary Table 1. Demographic and clinical characteristics for early-stage non-small cell lung cancer (NSCLC) patients from five cohorts.**

| Variable                                 | Discovery phase                   |                                              |                                  |                                  |                                | Validation phase               | Combined dataset                 |
|------------------------------------------|-----------------------------------|----------------------------------------------|----------------------------------|----------------------------------|--------------------------------|--------------------------------|----------------------------------|
|                                          | Cohort 1:<br>Harvard<br>(N = 151) | Cohort 2:<br>Spain <sup>a</sup><br>(N = 226) | Cohort 3:<br>Norway<br>(N = 133) | Cohort 4:<br>Sweden<br>(N = 103) | Discovery:<br>All<br>(N = 613) | Cohort 5:<br>TCGA<br>(N = 617) | Overall<br>samples<br>(N = 1230) |
| Age (years)                              | 67.67±9.92                        | 65.67±10.58                                  | 65.52±9.34                       | 67.54±9.99                       | 66.44±10.08                    | 66.51±9.47                     | 66.48±9.78                       |
| Sex, n (%)                               |                                   |                                              |                                  |                                  |                                |                                |                                  |
| Female                                   | 67 (44.37)                        | 105 (46.46)                                  | 71 (53.38)                       | 54 (52.43)                       | 297 (48.45)                    | 255 (41.33)                    | 552 (44.88)                      |
| Male                                     | 84 (55.63)                        | 121 (53.54)                                  | 62 (46.62)                       | 49 (47.57)                       | 316 (51.55)                    | 362 (58.67)                    | 678 (55.12)                      |
| Smoking status,<br>n (%)                 |                                   |                                              |                                  |                                  |                                |                                |                                  |
| Never                                    | 18 (11.92)                        | 30 (13.57)                                   | 17 (12.78)                       | 18 (17.48)                       | 83 (13.65)                     | 55 (9.18)                      | 138(11.22)                       |
| Former                                   | 81 (53.64)                        | 120 (54.30)                                  | 74 (55.64)                       | 54 (52.43)                       | 329 (54.11)                    | 376 (62.77)                    | 705 (58.41)                      |
| Current                                  | 52 (34.44)                        | 71 (32.13)                                   | 42 (31.58)                       | 31 (30.10)                       | 196 (32.24)                    | 168 (28.05)                    | 364 (30.16)                      |
| Unknown                                  | 0                                 | 5                                            | 0                                | 0                                | 5                              | 18                             | 23                               |
| Clinical stage, n (%)                    |                                   |                                              |                                  |                                  |                                |                                |                                  |
| I                                        | 104 (68.87)                       | 183 (80.97)                                  | 93 (69.92)                       | 95 (92.23)                       | 475 (77.49)                    | 393 (63.70)                    | 868 (70.57)                      |
| II                                       | 47 (31.13)                        | 43 (19.03)                                   | 40 (30.08)                       | 8 (7.77)                         | 138 (22.51)                    | 224 (36.30)                    | 362 (29.43)                      |
| Histology, n (%)                         |                                   |                                              |                                  |                                  |                                |                                |                                  |
| LUAD                                     | 96 (63.58)                        | 183 (80.97)                                  | 133 (100.00)                     | 80 (77.67)                       | 492 (80.26)                    | 332 (53.81)                    | 824 (66.99)                      |
| LUSC                                     | 55 (36.42)                        | 43 (19.03)                                   | 0 (0.00)                         | 23 (22.33)                       | 121 (19.74)                    | 285 (46.19)                    | 406 (33.01)                      |
| Chemotherapy, n (%)                      |                                   |                                              |                                  |                                  |                                |                                |                                  |
| No                                       | 142 (94.04)                       | 177 (90.77)                                  | 102 (76.69)                      | 67 (90.54)                       | 488 (88.25)                    | 194 (76.98)                    | 682 (84.72)                      |
| Yes                                      | 9 (5.96)                          | 18 (9.23)                                    | 31 (23.31)                       | 7 (9.46)                         | 65 (11.75)                     | 58 (23.02)                     | 123 (15.28)                      |
| Unknown                                  | 0                                 | 31                                           | 0                                | 29                               | 60                             | 365                            | 425                              |
| Radiotherapy, n (%)                      |                                   |                                              |                                  |                                  |                                |                                |                                  |
| No                                       | 132 (87.42)                       | 184 (94.36)                                  | 132 (99.25)                      | 74<br>(100.00)                   | 522 (94.39)                    | 239 (94.84)                    | 761 (94.53)                      |
| Yes                                      | 19 (12.58)                        | 11 (5.64)                                    | 1 (0.75)                         | 0 (0.00)                         | 31 (5.61)                      | 13 (5.16)                      | 44 (5.47)                        |
| Unknown                                  | 0                                 | 31                                           | 0                                | 29                               | 60                             | 365                            | 425                              |
| Adjuvant therapy <sup>b</sup> , n<br>(%) |                                   |                                              |                                  |                                  |                                |                                |                                  |
| No                                       | 127 (84.11)                       | 168 (86.15)                                  | 101 (75.94)                      | 67 (90.54)                       | 463 (83.73)                    | 187 (74.21)                    | 650 (80.75)                      |
| Yes                                      | 24 (15.89)                        | 27 (13.85)                                   | 32 (24.06)                       | 7 (9.46)                         | 90 (16.27)                     | 65 (25.79)                     | 155 (19.25)                      |
| Unknown                                  | 0                                 | 31                                           | 0                                | 29                               | 60                             | 365                            | 425                              |
| Survival year                            |                                   |                                              |                                  |                                  |                                |                                |                                  |
| Median (95% CI)                          | 6.66<br>(5.41-7.87)               | 7.12<br>(5.06-9.63)                          | 7.36<br>(6.77-7.95)*             | 7.39<br>(4.98-9.12)              | 7.39<br>(6.50-8.23)            | 4.54<br>(3.68-5.41)            | 6.60<br>(5.84-7.35)              |
| Dead (%)                                 | 122 (80.79)                       | 101 (44.69)                                  | 42 (31.58)                       | 58 (31.58)                       | 323 (52.69)                    | 142 (23.01)                    | 465 (37.80)                      |

<sup>a</sup>Cohort 2: Spain is a collaborative cohort, recruiting samples from Spain, Italy, UK, France, and USA.

<sup>b</sup>Adjuvant therapy includes chemotherapy or radiotherapy.

\*Restricted mean survival time is given since median is not available.

LUAD: lung adenocarcinoma; LUSC: lung squamous cell carcinoma

**Supplementary Table 2. Results for two lung adenocarcinoma (LUAD)-specific methylation–age interactions identified from a two-stage epigenome-wide association study.**

| Variable    | Discovery phase |                |                        | Validation phase |              |                        | Combined data |              |                        |
|-------------|-----------------|----------------|------------------------|------------------|--------------|------------------------|---------------|--------------|------------------------|
|             | HR              | 95% CI         | P                      | HR               | 95% CI       | P                      | HR            | 95% CI       | P                      |
| cg14326354  | 2.986           | 1.921 4.640    | 1.16×10 <sup>-06</sup> | 3.442            | 1.146 10.337 | 2.76×10 <sup>-02</sup> | 1.885         | 1.429 2.487  | 7.16×10 <sup>-06</sup> |
| Age         | 0.860           | 0.809 0.915    | 1.74×10 <sup>-06</sup> | 0.854            | 0.728 1.002  | 5.36×10 <sup>-02</sup> | 0.926         | 0.890 0.964  | 1.53×10 <sup>-04</sup> |
| Interaction | 0.982           | 0.976 0.989    | 1.11×10 <sup>-07</sup> | 0.981            | 0.966 0.997  | 2.02×10 <sup>-02</sup> | 0.989         | 0.986 0.994  | 9.18×10 <sup>-07</sup> |
| cg08700284  | 62.927          | 15.807 250.507 | 4.20×10 <sup>-09</sup> | 3.336            | 0.024 455.52 | 6.31×10 <sup>-01</sup> | 8.960         | 3.779 21.243 | 7.16×10 <sup>-06</sup> |
| Age         | 0.349           | 0.237 0.513    | 9.31×10 <sup>-08</sup> | 0.718            | 0.175 2.947  | 6.46×10 <sup>-01</sup> | 0.591         | 0.466 0.751  | 1.62×10 <sup>-05</sup> |
| Interaction | 0.944           | 0.925 0.964    | 6.55×10 <sup>-08</sup> | 0.981            | 0.910 1.057  | 6.17×10 <sup>-01</sup> | 0.971         | 0.959 0.984  | 9.18×10 <sup>-07</sup> |

HR: hazard ratio; 95% CI: 95% confidence interval

**Supplementary Table 3. Annotation information for significant lung adenocarcinoma (LUAD)-specific CpG probe.**

| CpG probe  | CHR | BP       | Region | Relation to CpG islands | Gene description <sup>a</sup>            |
|------------|-----|----------|--------|-------------------------|------------------------------------------|
| cg14326354 | 22  | 18900453 | 3'UTR  | S_Shelf                 | proline dehydrogenase 1 ( <i>PRODH</i> ) |

<sup>a</sup>Hyperlinks provide literature-based evidence for each gene from DAVID (<https://david.ncifcrf.gov>).

CHR: chromosome; BP: basepair

**Supplementary Table 4. Results of interaction for sensitivity analysis of one significant lung adenocarcinoma (LUAD)-specific CpG probe.**

| Variable    | Discovery phase |             |                        | Validation phase |             |                        | Combined data |             |                        |
|-------------|-----------------|-------------|------------------------|------------------|-------------|------------------------|---------------|-------------|------------------------|
|             | HR              | 95% CI      | P                      | HR               | 95% CI      | P                      | HR            | 95% CI      | P                      |
| cg14326354  | 3.056           | 1.950 4.792 | 1.11×10 <sup>-06</sup> | 3.522            | 1.156 10.73 | 2.67×10 <sup>-02</sup> | 3.048         | 2.043 4.547 | 4.77×10 <sup>-08</sup> |
| Age         | 0.858           | 0.806 0.914 | 1.61×10 <sup>-06</sup> | 0.853            | 0.726 1.003 | 5.36×10 <sup>-02</sup> | 0.861         | 0.814 0.911 | 1.80×10 <sup>-07</sup> |
| Interaction | 0.982           | 0.976 0.989 | 1.03×10 <sup>-07</sup> | 0.981            | 0.966 0.997 | 2.09×10 <sup>-02</sup> | 0.982         | 0.976 0.988 | 3.18×10 <sup>-09</sup> |

In sensitivity analysis, patients were excluded if their methylation values were out of range mean±3×standard deviation on logit<sub>2</sub> transformed scale.

HR: hazard ratio; 95% CI: 95% confidence interval

**Supplementary Table 5. Results of heterogeneity test of the interaction effect between subgroups categorized by covariates.**

| Covariate      | Subgroup               | HR <sub>interaction</sub> | 95% CI      | P <sub>interaction</sub> | Q <sub>heterogeneity</sub> | P <sub>heterogeneity</sub> |
|----------------|------------------------|---------------------------|-------------|--------------------------|----------------------------|----------------------------|
| Smoking status | Never or former smoker | 0.982                     | 0.974 0.989 | 8.42×10 <sup>-7</sup>    | <0.01                      | 0.9928                     |
|                | Current smoker         | 0.982                     | 0.971 0.992 | 7.85×10 <sup>-4</sup>    |                            |                            |
| Sex            | Male                   | 0.983                     | 0.974 0.990 | 1.57×10 <sup>-3</sup>    | 0.45                       | 0.5006                     |
|                | Female                 | 0.978                     | 0.968 0.988 | 2.10×10 <sup>-3</sup>    |                            |                            |
| Clinical stage | I                      | 0.985                     | 0.978 0.992 | 9.56×10 <sup>-3</sup>    | 1.51                       | 0.2185                     |
|                | II                     | 0.977                     | 0.965 0.988 | 1.65×10 <sup>-4</sup>    |                            |                            |
|                | Harvard                | 0.979                     | 0.964 0.995 | 7.92×10 <sup>-3</sup>    |                            |                            |
| Study cohort   | Norway                 | 0.987                     | 0.968 1.006 | 1.72×10 <sup>-1</sup>    | 0.49                       | 0.9745                     |
|                | Spain                  | 0.985                     | 0.973 0.997 | 1.75×10 <sup>-2</sup>    |                            |                            |
|                | Sweden                 | 0.983                     | 0.959 1.008 | 1.77×10 <sup>-1</sup>    |                            |                            |
|                | TCGA                   | 0.981                     | 0.966 0.997 | 2.02×10 <sup>-2</sup>    |                            |                            |

HR: hazard ratio; 95% CI: 95% confidence interval

**Supplementary Table 6. Results of low cg14326354<sub>PRODH</sub> methylation effect on lung adenocarcinoma (LUAD) survival in young and elderly populations defined using boundary of 95% confidence interval (BoCI) standard.**

| Population              | Discovery phase |             |                       | Validation phase |             |                       | Combined data |             |                       |
|-------------------------|-----------------|-------------|-----------------------|------------------|-------------|-----------------------|---------------|-------------|-----------------------|
|                         | HR              | 95% CI      | P                     | HR               | 95% CI      | P                     | HR            | 95% CI      | P                     |
| Young (age <57 years)   | 1.182           | 1.005 1.389 | 4.29×10 <sup>-2</sup> | 1.294            | 1.023 1.636 | 3.18×10 <sup>-2</sup> | 1.200         | 1.030 1.401 | 1.97×10 <sup>-2</sup> |
| Elderly (age >65 years) | 0.810           | 0.742 0.885 | 3.12×10 <sup>-6</sup> | 0.858            | 0.754 0.976 | 1.99×10 <sup>-2</sup> | 0.814         | 0.751 0.882 | 5.38×10 <sup>-7</sup> |

Patients from Harvard, Spain, Norway, and Sweden cohorts were assigned to discovery phase; patients in TCGA were assigned to validation phase.

HR: hazard ratio; 95% CI: 95% confidence interval

**Supplementary Table 7. Correlation analysis of association between cg14326354<sub>PRODH</sub> methylation and proliferation-associated gene expression in lung adenocarcinoma (LUAD) patients using The Cancer Genome Atlas data, as well as survival analysis of proliferation-associated genes (from KEGG database).**

| Gene            | Correlation analysis |                      |                              | Survival analysis |                    |                              |
|-----------------|----------------------|----------------------|------------------------------|-------------------|--------------------|------------------------------|
|                 | r                    | 95% CI               | P                            | HR                | 95% CI             | P                            |
| <i>BTG2</i>     | <b>-0.313</b>        | <b>-0.408 -0.212</b> | <b>6.80×10<sup>-09</sup></b> | <b>0.704</b>      | <b>0.564 0.878</b> | <b>1.83×10<sup>-03</sup></b> |
| <i>NPDC1</i>    | -0.266               | -0.364 -0.163        | 9.88×10 <sup>-07</sup>       | 0.937             | 0.755 1.164        | 0.558                        |
| <i>KIAA1524</i> | <b>0.243</b>         | <b>0.139 0.342</b>   | <b>8.40×10<sup>-06</sup></b> | <b>1.383</b>      | <b>1.103 1.733</b> | <b>4.94×10<sup>-03</sup></b> |
| <i>MKI67</i>    | <b>0.199</b>         | <b>0.093 0.301</b>   | <b>2.84×10<sup>-04</sup></b> | <b>1.440</b>      | <b>1.115 1.859</b> | <b>5.14×10<sup>-03</sup></b> |
| <i>BTG1</i>     | -0.188               | -0.290 -0.081        | 6.29×10 <sup>-04</sup>       | 1.257             | 0.869 1.819        | 0.225                        |
| <i>BOP1</i>     | 0.122                | 0.014 0.227          | 2.72×10 <sup>-02</sup>       | 1.170             | 0.910 1.505        | 0.222                        |
| <i>BTG4</i>     | -0.118               | -0.223 -0.010        | 3.29×10 <sup>-02</sup>       | 0.995             | 0.769 1.288        | 0.971                        |
| <i>CDC123</i>   | <b>0.111</b>         | <b>0.003 0.217</b>   | <b>4.46×10<sup>-02</sup></b> | <b>1.798</b>      | <b>1.045 3.097</b> | <b>3.41×10<sup>-02</sup></b> |
| <i>PA2G4</i>    | 0.091                | -0.017 0.197         | 9.94×10 <sup>-02</sup>       |                   |                    |                              |
| <i>MTCP1NB</i>  | 0.079                | -0.030 0.185         | 1.55×10 <sup>-01</sup>       |                   |                    |                              |
| <i>C8orf22</i>  | -0.067               | -0.174 0.042         | 2.29×10 <sup>-01</sup>       |                   |                    |                              |
| <i>HEY1</i>     | 0.061                | -0.048 0.168         | 2.71×10 <sup>-01</sup>       |                   |                    |                              |
| <i>PPDPF</i>    | -0.058               | -0.166 0.050         | 2.92×10 <sup>-01</sup>       |                   |                    |                              |
| <i>SIPA1L2</i>  | 0.055                | -0.054 0.162         | 3.24×10 <sup>-01</sup>       |                   |                    |                              |
| <i>MTCP1</i>    | 0.047                | -0.061 0.155         | 3.94×10 <sup>-01</sup>       |                   |                    |                              |
| <i>SIPA1L3</i>  | -0.039               | -0.146 0.070         | 4.84×10 <sup>-01</sup>       |                   |                    |                              |
| <i>URGCP</i>    | 0.036                | -0.073 0.144         | 5.17×10 <sup>-01</sup>       |                   |                    |                              |
| <i>SAVI</i>     | -0.032               | -0.139 0.077         | 5.69×10 <sup>-01</sup>       |                   |                    |                              |
| <i>BTG3</i>     | -0.024               | -0.132 0.084         | 6.63×10 <sup>-01</sup>       |                   |                    |                              |
| <i>PDS5B</i>    | -0.023               | -0.131 0.085         | 6.74×10 <sup>-01</sup>       |                   |                    |                              |
| <i>SIPA1</i>    | -0.008               | -0.117 0.100         | 8.80×10 <sup>-01</sup>       |                   |                    |                              |
| <i>PEA15</i>    | -0.006               | -0.114 0.103         | 9.20×10 <sup>-01</sup>       |                   |                    |                              |
| <i>SIPA1L1</i>  | 0.000                | -0.108 0.108         | 9.99×10 <sup>-01</sup>       |                   |                    |                              |

Correlation coefficient (r), 95% CI, and P-values were derived from Pearson correlation analysis; survival analysis HR, 95% CI, and P-values were derived from Cox proportional hazards model.

HR: hazard ratio; 95% CI: 95% confidence interval.

**Supplementary Table 8. Results of heterogeneity test of the interaction effect between lung adenocarcinoma (LUAD) and lung squamous cell carcinoma (LUSC) populations.**

| CpG probe  | LUAD  |             |       | LUSC  |        |      | Heterogeneity |   |
|------------|-------|-------------|-------|-------|--------|------|---------------|---|
|            | HR    | 95% CI      | P     | HR    | 95% CI | P    | Q             | P |
| cg08470135 | 0.944 | 0.925 0.964 | 0.975 | 0.946 | 1.004  | 2.97 | 0.0847        |   |
| cg14326354 | 0.982 | 0.976 0.989 | 0.982 | 0.969 | 0.995  | 0.00 | 0.9764        |   |

HR: hazard ratio; 95% CI: 95% confidence interval.
