# Supplementary material for: Epigenome-wide gene–age interaction analysis reveals reversed effects of PRODH DNA methylation on survival between young and elderly early-stage NSCLC patients
Source: Aging (Albany NY). 2020 Jun 8;12(11):10642–62. doi: 10.18632/aging.103284 (PMC7346054; doi:10.18632/aging.103284)
Supplement: Supplementary Material 1 [file aging-12-103284-s005..xlsx]

## Sheet: Supp1_LUAD_Discovery
Supplementary Material 1. Epigenome-wide association results in LUAD patients. Only summary results of interaction terms were shown in the table.
CpG	Discovery phase					Validation phase				Combined data
	HR	LCI	UCI	pvalue	Bonf	HR	LCI	UCI	pvalue	HR	LCI	UCI	pvalue	*Only summary results of interaction terms were shown in the table
cg08470135	0.944211	0.924752	0.964079	6.55125e-08	0.0204328	0.981	0.966	0.997	0.0202	0.989	0.986	0.994	9.18e-07
cg14326354	0.982146	0.975635	0.9887	1.10515e-07	0.0344686	0.981	0.91	1.057	0.617	0.971	0.959	0.984	9.18e-07
cg06805572	1.06413	1.03967	1.08917	1.61415e-07	0.050344
cg10784511	0.990571	0.986963	0.994192	3.5962e-07	0.112162
cg18516619	1.01976	1.01202	1.02755	4.80211e-07	0.149773
cg27080765	0.749879	0.670314	0.838888	4.91157e-07	0.153188
cg03983726	0.950603	0.931989	0.96959	5.14852e-07	0.160578
cg07475247	0.717553	0.630342	0.816831	5.16442e-07	0.161074
cg12176426	0.8972	0.859921	0.936096	5.44879e-07	0.169943
cg21452766	0.725	0.63906	0.822496	5.86941e-07	0.183062
cg06820286	0.823124	0.762388	0.888699	6.45399e-07	0.201294
cg15898408	0.977708	0.969039	0.986454	7.00244e-07	0.2184
cg24867215	0.981439	0.9742	0.988732	7.04505e-07	0.219729
cg20963995	1.07608	1.04534	1.10772	7.0991e-07	0.221414
cg26221410	0.963725	0.949677	0.977981	8.14305e-07	0.253974
cg19494004	0.790984	0.720308	0.868596	9.11124e-07	0.284171
cg13682140	0.979861	0.971924	0.987863	9.44646e-07	0.294627
cg07156299	0.953154	0.934922	0.971741	1.12151e-06	0.349789
cg19430780	0.977987	0.969254	0.986797	1.14833e-06	0.358155
cg03176386	0.986063	0.980484	0.991674	1.24716e-06	0.388977
cg23932658	0.936785	0.912321	0.961904	1.31925e-06	0.411461
cg20078640	0.786534	0.713586	0.866939	1.32984e-06	0.414765
cg12120904	0.983582	0.977003	0.990206	1.33644e-06	0.416824
cg20075156	1.01965	1.01162	1.02775	1.42998e-06	0.445998
cg14353516	0.746684	0.662908	0.841047	1.50201e-06	0.468464
cg16424683	0.977689	0.968743	0.986718	1.50264e-06	0.46866
cg08402640	0.779715	0.704498	0.862964	1.52822e-06	0.476639
cg03516548	0.965416	0.951607	0.979426	1.6836e-06	0.5251
cg00233779	0.982688	0.975675	0.989753	1.76798e-06	0.551417
cg05284724	0.782874	0.708064	0.865589	1.78174e-06	0.55571
cg24742349	1.01421	1.00835	1.02011	1.85733e-06	0.579284
cg24655899	0.774254	0.696533	0.860647	2.13229e-06	0.665043
cg09357135	0.80955	0.741676	0.883635	2.25665e-06	0.703829
cg07557560	1.02451	1.01426	1.03486	2.35321e-06	0.733946
cg24261270	0.871387	0.822602	0.923065	2.82148e-06	0.879995
cg11856822	1.01778	1.01028	1.02533	2.96157e-06	0.923686
cg27094856	1.03088	1.01777	1.04416	3.19395e-06	0.996165
cg00091794	0.981508	0.973808	0.989268	3.39793e-06	1
cg14069049	1.01853	1.01066	1.02646	3.52145e-06	1
cg08120141	0.976788	0.967126	0.986546	3.64665e-06	1
cg00129556	0.95056	0.930315	0.971245	3.90734e-06	1
cg25401482	0.978026	0.968831	0.987307	4.01582e-06	1
cg00105253	0.8886	0.844941	0.934515	4.33186e-06	1
cg26467538	0.976836	0.967119	0.986651	4.33263e-06	1
cg25707924	0.976049	0.966004	0.986199	4.36956e-06	1
cg19141913	0.977636	0.968244	0.987119	4.38226e-06	1
cg12142521	1.02831	1.0161	1.04068	4.67267e-06	1
cg10583414	1.02262	1.01285	1.03249	4.96099e-06	1
cg02844985	0.909044	0.872583	0.947029	4.97555e-06	1
cg20728746	0.954199	0.935178	0.973606	5.02487e-06	1
cg08967837	0.82064	0.753718	0.893504	5.25275e-06	1
cg27513574	1.0161	1.00913	1.02313	5.49238e-06	1
cg23088551	0.980597	0.972336	0.988929	5.65227e-06	1
cg08510182	0.969647	0.956817	0.982649	5.75037e-06	1
cg25581784	0.832593	0.769124	0.901299	5.93624e-06	1
cg05357861	1.02186	1.01234	1.03147	5.9363e-06	1
cg11856189	0.875194	0.826071	0.927239	6.09235e-06	1
cg20064231	0.984955	0.978503	0.991449	6.15621e-06	1
cg21921022	0.90327	0.864293	0.944004	6.17059e-06	1
cg18867375	0.817371	0.748822	0.892194	6.4085e-06	1
cg26411702	1.09847	1.05445	1.14432	6.76455e-06	1
cg24809299	0.765096	0.680853	0.859763	6.83921e-06	1
cg03979905	0.901901	0.862201	0.943429	6.94465e-06	1
cg14857380	0.946154	0.923584	0.969275	7.0132e-06	1
cg23281215	1.41343	1.21531	1.64385	7.09939e-06	1
cg04873963	0.900107	0.859674	0.942443	7.19412e-06	1
cg06588735	0.944464	0.921188	0.968329	7.1995e-06	1
cg01739210	0.983782	0.976771	0.990844	7.43629e-06	1
cg01782227	1.06692	1.03711	1.0976	7.48672e-06	1
cg25609220	0.983022	0.975683	0.990417	7.51938e-06	1
cg22424746	0.987715	0.982382	0.993077	7.634e-06	1
cg06283432	1.12027	1.06581	1.17751	7.94235e-06	1
cg00498653	0.957841	0.939907	0.976117	7.94857e-06	1
cg20401521	1.0191	1.01067	1.0276	8.03319e-06	1
cg24863152	0.986248	0.980266	0.992268	8.18383e-06	1
cg27025856	0.966075	0.951528	0.980843	8.24332e-06	1
cg02483058	0.9865	0.980622	0.992412	8.26905e-06	1
cg17357865	0.860431	0.805386	0.919238	8.3323e-06	1
cg25894334	1.02805	1.01561	1.04063	8.38429e-06	1
cg20722129	0.980455	0.971977	0.989008	8.41061e-06	1
cg15502420	0.89205	0.848306	0.93805	8.47492e-06	1
cg20452215	0.956828	0.938412	0.975606	8.56339e-06	1
cg22621780	0.988324	0.983225	0.99345	8.60668e-06	1
cg22385477	0.893839	0.850696	0.939171	8.73619e-06	1
cg23065174	0.872786	0.82197	0.926743	8.75946e-06	1
cg01464738	0.971608	0.959348	0.984024	8.76129e-06	1
cg20577878	0.752187	0.663264	0.853031	9.151e-06	1
cg00706833	0.979129	0.970041	0.988302	9.28424e-06	1
cg17339484	1.09732	1.05309	1.14341	9.67178e-06	1
cg05048159	1.05174	1.02849	1.07553	9.7697e-06	1
cg18421529	1.04678	1.02573	1.06825	1.02285e-05	1
cg08856420	0.98202	0.974133	0.989971	1.03463e-05	1
cg00704869	0.980046	0.971304	0.988866	1.03723e-05	1
cg00089353	0.818681	0.749006	0.894838	1.04176e-05	1
cg04106903	0.968979	0.955493	0.982656	1.04959e-05	1
cg20561300	0.981145	0.972873	0.989487	1.04981e-05	1
cg03707776	0.984201	0.97725	0.991201	1.0616e-05	1
cg12516270	1.01832	1.01012	1.02658	1.06951e-05	1
cg06532767	0.979393	0.970352	0.988518	1.08024e-05	1
cg14834267	1.01947	1.01075	1.02827	1.09335e-05	1
cg17580844	0.986348	0.980323	0.99241	1.09532e-05	1
cg26928336	0.709132	0.608343	0.826619	1.11099e-05	1
cg16048372	0.908203	0.87	0.948084	1.12647e-05	1
cg27559870	0.966174	0.951445	0.981132	1.13331e-05	1
cg03190379	0.975744	0.965103	0.986502	1.13853e-05	1
cg01756381	1.01641	1.00905	1.02383	1.1386e-05	1
cg14235676	0.943596	0.919446	0.968381	1.13948e-05	1
cg01814364	0.92687	0.89596	0.958846	1.1419e-05	1
cg06230462	0.896273	0.853436	0.94126	1.17262e-05	1
cg03119088	0.964881	0.949548	0.98046	1.21722e-05	1
cg02642914	1.0485	1.02643	1.07104	1.27575e-05	1
cg06858599	0.777777	0.69475	0.870726	1.28085e-05	1
cg20118020	0.965389	0.950232	0.980787	1.28456e-05	1
cg16334840	0.893636	0.849609	0.939944	1.28492e-05	1
cg23279335	0.98981	0.985265	0.994376	1.2893e-05	1
cg00097794	0.979019	0.969731	0.988395	1.30032e-05	1
cg17780413	0.942908	0.918312	0.968164	1.30644e-05	1
cg15811902	0.968778	0.955055	0.982698	1.31425e-05	1
cg21494069	0.974865	0.963765	0.986094	1.32114e-05	1
cg19823329	1.09977	1.0537	1.14785	1.3283e-05	1
cg14344110	0.96595	0.950987	0.981148	1.36605e-05	1
cg27048409	0.878085	0.828036	0.931159	1.41175e-05	1
cg22176017	0.924484	0.892273	0.957858	1.42814e-05	1
cg08333555	0.919487	0.885278	0.955018	1.42993e-05	1
cg25927124	0.851687	0.79211	0.915744	1.43241e-05	1
cg00082540	0.982083	0.974093	0.990138	1.43722e-05	1
cg26563141	0.985754	0.979384	0.992166	1.43946e-05	1
cg03457587	0.896286	0.852979	0.941793	1.4691e-05	1
cg02553054	0.974461	0.96312	0.985935	1.48131e-05	1
cg01900788	0.952969	0.932413	0.973977	1.49175e-05	1
cg27410012	0.81714	0.745717	0.895403	1.50856e-05	1
cg07242901	0.972737	0.960633	0.984994	1.51471e-05	1
cg18944786	0.973253	0.961367	0.985285	1.52882e-05	1
cg05210886	0.971294	0.958552	0.984204	1.53723e-05	1
cg14678744	0.973915	0.962312	0.985657	1.54232e-05	1
cg13969672	0.904659	0.864432	0.946757	1.57743e-05	1
cg27409761	0.889715	0.843741	0.938194	1.58328e-05	1
cg04371440	0.693987	0.587918	0.819193	1.58456e-05	1
cg25934680	1.1989	1.10404	1.30192	1.60899e-05	1
cg03216846	1.0107	1.00582	1.01561	1.63613e-05	1
cg16886895	1.15628	1.08236	1.23526	1.64928e-05	1
cg22805491	0.992174	0.988631	0.995729	1.66588e-05	1
cg10894991	0.987019	0.981166	0.992907	1.66638e-05	1
cg05741530	0.906814	0.867313	0.948115	1.67252e-05	1
cg01845051	0.978311	0.968587	0.988133	1.6904e-05	1
cg13971574	0.807393	0.732291	0.890198	1.74782e-05	1
cg19259030	0.98542	0.978835	0.992049	1.75893e-05	1
cg13678240	0.897846	0.854723	0.943144	1.77999e-05	1
cg09023820	1.01882	1.01018	1.02753	1.78052e-05	1
cg08032483	0.979957	0.970934	0.989064	1.78809e-05	1
cg12509435	0.879519	0.829376	0.932695	1.81625e-05	1
cg24580066	1.05186	1.02781	1.07648	1.84038e-05	1
cg02107558	0.973178	0.96114	0.985367	1.85945e-05	1
cg00001245	0.835228	0.769134	0.907001	1.86356e-05	1
cg24032393	0.984583	0.977596	0.99162	1.90181e-05	1
cg22992167	0.852514	0.792343	0.917254	1.93067e-05	1
cg25595873	0.732646	0.635202	0.845038	1.9351e-05	1
cg01416487	0.821751	0.750965	0.899209	1.94082e-05	1
cg21450137	0.785523	0.703146	0.877551	1.94738e-05	1
cg05760882	0.983921	0.976622	0.991274	1.97939e-05	1
cg23325313	0.976203	0.965461	0.987064	1.98775e-05	1
cg09834234	0.928905	0.897957	0.960919	1.99058e-05	1
cg05350224	0.984221	0.977052	0.991442	2.00407e-05	1
cg18098089	0.979669	0.970464	0.988962	2.00521e-05	1
cg13313916	0.927387	0.895775	0.960114	2.04227e-05	1
cg26343154	0.971165	0.958177	0.98433	2.05185e-05	1
cg24769924	0.975976	0.965113	0.986961	2.06072e-05	1
cg00765655	0.988332	0.983006	0.993687	2.07233e-05	1
cg11072882	1.05148	1.02741	1.07611	2.15305e-05	1
cg06652632	0.988044	0.982574	0.993544	2.16829e-05	1
cg04756597	0.984073	0.976807	0.991394	2.17894e-05	1
cg12190057	0.971525	0.958643	0.98458	2.21812e-05	1
cg14953672	0.86079	0.803183	0.922528	2.21877e-05	1
cg11565703	0.842103	0.777808	0.911713	2.22611e-05	1
cg07749194	0.874969	0.822576	0.930699	2.23913e-05	1
cg21394787	0.851245	0.790146	0.917069	2.25428e-05	1
cg06190092	0.696299	0.588942	0.823225	2.267e-05	1
cg19488922	0.986248	0.979946	0.99259	2.29296e-05	1
cg21785260	0.853835	0.793611	0.918629	2.29393e-05	1
cg26616148	0.96226	0.945243	0.979583	2.3792e-05	1
cg25318278	0.985498	0.97884	0.992201	2.40417e-05	1
cg18119609	0.853973	0.793642	0.918891	2.41344e-05	1
cg07134292	0.874899	0.822269	0.930898	2.4208e-05	1
cg23465749	0.984408	0.977251	0.991617	2.43184e-05	1
cg09813769	0.97265	0.960198	0.985263	2.46144e-05	1
cg20458353	0.974487	0.962838	0.986276	2.52963e-05	1
cg08218877	0.975221	0.963901	0.986674	2.53234e-05	1
cg11357138	0.9825	0.974453	0.990613	2.58068e-05	1
cg03564506	0.958383	0.939588	0.977553	2.5913e-05	1
cg03793778	0.98337	0.975716	0.991085	2.59795e-05	1
cg06040998	1.02192	1.01165	1.0323	2.60776e-05	1
cg00339687	0.984643	0.977563	0.991775	2.63328e-05	1
cg10757852	0.990611	0.986263	0.994978	2.63343e-05	1
cg10816922	0.977616	0.967349	0.987992	2.63734e-05	1
cg13645811	0.984502	0.977355	0.991701	2.64879e-05	1
cg19603390	0.595678	0.467801	0.758511	2.6493e-05	1
cg01580888	1.0372	1.01968	1.05503	2.65724e-05	1
cg16920991	0.908948	0.869327	0.950374	2.68863e-05	1
cg27661209	0.989107	0.984063	0.994178	2.69134e-05	1
cg16624788	0.950911	0.928823	0.973524	2.69549e-05	1
cg16826874	1.05671	1.02982	1.08429	2.7329e-05	1
cg00339300	1.03758	1.01985	1.05562	2.73791e-05	1
cg20047235	0.950877	0.928745	0.973536	2.76307e-05	1
cg15994999	0.796992	0.71676	0.886206	2.77109e-05	1
cg04307723	0.778297	0.692219	0.87508	2.77266e-05	1
cg07661849	0.987989	0.982421	0.993589	2.78911e-05	1
cg19256291	1.0118	1.00626	1.01736	2.81478e-05	1
cg13055685	0.978154	0.968087	0.988326	2.85694e-05	1
cg06661266	0.987467	0.98165	0.993317	2.8572e-05	1
cg18570646	0.977115	0.966575	0.987769	2.86506e-05	1
cg12502342	0.701402	0.594013	0.828204	2.87508e-05	1
cg05650604	0.95984	0.941581	0.978452	2.87641e-05	1
cg07405534	0.912325	0.87391	0.952429	2.90758e-05	1
cg08941195	0.978912	0.969178	0.988744	2.91445e-05	1
cg01371258	0.726204	0.625006	0.843787	2.93654e-05	1
cg14557714	1.02629	1.01386	1.03887	2.97423e-05	1
cg25725117	1.08342	1.04343	1.12494	2.9755e-05	1
cg06952236	0.923103	0.889054	0.958457	3.00937e-05	1
cg20103938	0.981142	0.972407	0.989955	3.01178e-05	1
cg23249336	0.920446	0.885292	0.956996	3.01446e-05	1
cg24043307	0.970196	0.956498	0.984089	3.03598e-05	1
cg02617702	0.958423	0.939475	0.977753	3.06904e-05	1
cg14761175	0.986066	0.979578	0.992597	3.09638e-05	1
cg18411237	0.947571	0.923853	0.971898	3.12758e-05	1
cg13311607	0.974509	0.962734	0.986427	3.13742e-05	1
cg01921777	0.757224	0.664283	0.863168	3.1502e-05	1
cg27230396	0.877705	0.825411	0.933312	3.15499e-05	1
cg15203597	0.973441	0.961179	0.98586	3.15968e-05	1
cg08273666	0.814768	0.739821	0.897307	3.17051e-05	1
cg00462492	0.935418	0.906457	0.965304	3.17333e-05	1
cg16099036	1.03612	1.01894	1.05359	3.19157e-05	1
cg09291834	1.03179	1.01668	1.04713	3.20665e-05	1
cg21715212	0.973066	0.960623	0.98567	3.20832e-05	1
cg23341567	0.970589	0.957026	0.984344	3.21568e-05	1
cg27393982	0.777783	0.690815	0.875698	3.26752e-05	1
cg17342064	1.06775	1.03521	1.10132	3.30149e-05	1
cg09057050	0.946107	0.921678	0.971182	3.31257e-05	1
cg08106661	0.957541	0.938116	0.977368	3.33729e-05	1
cg14402224	0.986178	0.97971	0.99269	3.39483e-05	1
cg02882733	0.919415	0.883602	0.95668	3.40391e-05	1
cg09295382	0.874941	0.821336	0.932046	3.44981e-05	1
cg19767734	0.865571	0.808394	0.926792	3.46778e-05	1
cg18011045	1.12883	1.06587	1.19551	3.495e-05	1
cg13778499	0.852581	0.790556	0.919472	3.49571e-05	1
cg06768251	0.973107	0.960619	0.985757	3.52012e-05	1
cg27166033	1.04649	1.0242	1.06927	3.53545e-05	1
cg01466967	0.910686	0.871192	0.951971	3.53644e-05	1
cg17147211	1.01665	1.00873	1.02464	3.54715e-05	1
cg06029095	0.986286	0.979851	0.992764	3.56129e-05	1
cg11058154	1.0279	1.01457	1.0414	3.56986e-05	1
cg07283778	0.922524	0.887916	0.958481	3.57135e-05	1
cg15324969	0.800546	0.720392	0.889618	3.58184e-05	1
cg03128534	0.777912	0.690565	0.876306	3.58323e-05	1
cg19007537	0.834719	0.766134	0.909444	3.62963e-05	1
cg20611850	0.967148	0.951933	0.982606	3.64478e-05	1
cg11082282	0.770414	0.680683	0.871973	3.65412e-05	1
cg11471469	0.910692	0.871121	0.95206	3.6679e-05	1
cg14510374	0.937916	0.909798	0.966903	3.67259e-05	1
cg13735282	1.01689	1.00883	1.02502	3.69677e-05	1
cg15279616	0.963299	0.946337	0.980566	3.70622e-05	1
cg13588023	1.06739	1.03481	1.101	3.73052e-05	1
cg02241235	0.947506	0.923525	0.972109	3.74555e-05	1
cg12906019	0.957574	0.938024	0.977531	3.8006e-05	1
cg07980804	0.945784	0.921025	0.971208	3.81314e-05	1
cg09944020	0.959248	0.940442	0.97843	3.81368e-05	1
cg23712401	1.01148	1.006	1.017	3.87287e-05	1
cg14189614	0.940563	0.913503	0.968425	3.88705e-05	1
cg07578695	1.01673	1.00873	1.0248	3.88951e-05	1
cg19601653	0.930712	0.899408	0.963107	3.89852e-05	1
cg14030359	0.975548	0.964107	0.987124	3.90242e-05	1
cg22079161	1.01371	1.00715	1.0203	3.90404e-05	1
cg00085061	0.979094	0.969285	0.989001	3.90713e-05	1
cg14108394	0.792348	0.709148	0.88531	3.92004e-05	1
cg00313981	0.961973	0.944357	0.979919	3.93736e-05	1
cg21117668	1.02251	1.01171	1.03341	3.94078e-05	1
cg16670889	0.976304	0.965197	0.987538	3.98631e-05	1
cg16043700	0.977907	0.967538	0.988387	3.99427e-05	1
cg00885732	0.805828	0.72692	0.893301	4.02773e-05	1
cg05351750	0.980885	0.971889	0.989965	4.03582e-05	1
cg08293408	0.968888	0.954373	0.983624	4.06329e-05	1
cg22186503	0.978213	0.967976	0.988559	4.0646e-05	1
cg04502517	0.981364	0.972583	0.990224	4.09226e-05	1
cg26114324	1.0132	1.00687	1.01957	4.12572e-05	1
cg24687764	0.655106	0.53518	0.801905	4.1324e-05	1
cg25018576	0.89295	0.845893	0.942625	4.14729e-05	1
cg26425933	1.04389	1.02266	1.06556	4.18937e-05	1
cg08447842	0.982017	0.973525	0.990583	4.21756e-05	1
cg11787785	1.07248	1.03715	1.109	4.2244e-05	1
cg11392995	0.863732	0.805207	0.926511	4.27357e-05	1
cg16006220	0.987582	0.981689	0.993511	4.27978e-05	1
cg12121166	1.00809	1.00421	1.01199	4.29386e-05	1
cg02923264	1.01337	1.00694	1.01984	4.32217e-05	1
cg18114913	0.985387	0.978455	0.992368	4.37092e-05	1
cg27237907	1.01024	1.00532	1.01519	4.37853e-05	1
cg10181911	0.960079	0.941497	0.979027	4.39588e-05	1
cg02386420	1.01869	1.00968	1.02778	4.39814e-05	1
cg02006803	0.922424	0.887371	0.958861	4.40372e-05	1
cg05332270	0.98319	0.975219	0.991226	4.46516e-05	1
cg01932091	0.784173	0.697758	0.881291	4.47931e-05	1
cg04249769	0.969917	0.955789	0.984254	4.50379e-05	1
cg04976746	0.843468	0.777229	0.915351	4.51202e-05	1
cg12437254	0.980975	0.971964	0.99007	4.51445e-05	1
cg04132418	1.00577	1.00299	1.00855	4.5241e-05	1
cg25735887	1.02289	1.01183	1.03408	4.53786e-05	1
cg04180093	0.668921	0.551379	0.81152	4.53881e-05	1
cg03948207	0.963744	0.946785	0.981006	4.56179e-05	1
cg10005978	0.987774	0.981948	0.993634	4.57546e-05	1
cg01542423	1.01176	1.00609	1.01746	4.58501e-05	1
cg24744172	1.02296	1.01184	1.0342	4.67714e-05	1
cg15663484	0.969677	0.955409	0.984159	4.67715e-05	1
cg16403912	0.932603	0.90178	0.964479	4.71983e-05	1
cg25647665	0.963549	0.946466	0.980941	4.73657e-05	1
cg08614441	0.986369	0.979866	0.992916	4.77412e-05	1
cg18174258	1.02338	1.01204	1.03486	4.84236e-05	1
cg12229597	0.826684	0.754145	0.9062	4.86506e-05	1
cg04327947	0.954191	0.932833	0.976039	4.91281e-05	1
cg19310786	0.970327	0.956317	0.984541	4.91479e-05	1
cg17184161	0.968373	0.953459	0.98352	4.94213e-05	1
cg06727855	0.853538	0.790688	0.921385	4.94816e-05	1
cg23819145	0.989025	0.983767	0.994311	4.95602e-05	1
cg08369436	0.863284	0.804103	0.926821	4.96356e-05	1
cg08007899	0.981249	0.972317	0.990264	4.97442e-05	1
cg18650263	0.992088	0.988287	0.995903	4.98347e-05	1
cg22815031	0.899922	0.855198	0.946984	5.02581e-05	1
cg23979458	1.03571	1.01829	1.05343	5.04358e-05	1
cg24080577	1.04357	1.02227	1.06532	5.04854e-05	1
cg06947082	1.04418	1.02258	1.06624	5.04878e-05	1
cg14826972	0.851111	0.787259	0.920143	5.0865e-05	1
cg07729059	1.01613	1.00829	1.02403	5.11618e-05	1
cg12496156	0.98362	0.975789	0.991513	5.12734e-05	1
cg04781796	0.992768	0.989287	0.996262	5.13024e-05	1
cg18995088	1.0188	1.00966	1.02803	5.13386e-05	1
cg07436562	0.988919	0.983599	0.994267	5.13786e-05	1
cg23483530	0.986784	0.980449	0.993159	5.13858e-05	1
cg00768999	0.981269	0.972329	0.990292	5.14509e-05	1
cg24174307	0.979504	0.969732	0.989374	5.16335e-05	1
cg04750265	0.985577	0.978669	0.992535	5.16977e-05	1
cg19653161	0.933173	0.902438	0.964955	5.17364e-05	1
cg16873684	0.815912	0.739361	0.900389	5.17922e-05	1
cg15817481	0.959551	0.940551	0.978936	5.20531e-05	1
cg17156100	0.980746	0.971549	0.99003	5.24796e-05	1
cg26149738	0.981144	0.972134	0.990239	5.26055e-05	1
cg10765857	0.984229	0.976675	0.991842	5.26271e-05	1
cg04906985	0.873971	0.818712	0.932959	5.29209e-05	1
cg08104761	0.788334	0.702466	0.884699	5.29963e-05	1
cg22192374	0.988058	0.982318	0.993832	5.31246e-05	1
cg15772223	0.950508	0.927395	0.974198	5.31678e-05	1
cg12275723	1.04913	1.02499	1.07384	5.39877e-05	1
cg00333193	0.985777	0.978945	0.992657	5.41351e-05	1
cg04316311	0.977296	0.966458	0.988255	5.42922e-05	1
cg17755495	0.987868	0.982029	0.993741	5.44009e-05	1
cg05975881	0.986221	0.979598	0.992889	5.44943e-05	1
cg14226182	1.01409	1.00722	1.02101	5.45591e-05	1
cg25901400	0.979446	0.96961	0.989381	5.50481e-05	1
cg16517702	1.01528	1.00782	1.02279	5.5805e-05	1
cg24980994	0.906058	0.863583	0.950623	5.64853e-05	1
cg22921229	0.981569	0.972721	0.990498	5.65925e-05	1
cg14578355	0.925793	0.891684	0.961206	5.67872e-05	1
cg04232340	0.972762	0.95977	0.985929	5.6818e-05	1
cg14106119	0.780024	0.691147	0.880331	5.69813e-05	1
cg13451651	0.986048	0.979324	0.992818	5.70714e-05	1
cg22707563	0.937071	0.907866	0.967215	5.73613e-05	1
cg06661765	0.901322	0.856829	0.948126	5.76436e-05	1
cg07811113	0.889274	0.839841	0.941616	5.78162e-05	1
cg13179216	0.981565	0.972703	0.990507	5.78478e-05	1
cg06864275	0.761839	0.667243	0.869845	5.78659e-05	1
cg01578341	0.948335	0.924129	0.973176	5.7943e-05	1
cg00534492	0.987689	0.981743	0.993671	5.80667e-05	1
cg13268374	0.950273	0.926935	0.974198	5.80773e-05	1
cg26220033	0.843357	0.776129	0.916409	5.83211e-05	1
cg00716787	0.856475	0.794153	0.923688	5.8361e-05	1
cg00834379	0.945339	0.919775	0.971613	5.84889e-05	1
cg01435344	1.02071	1.01056	1.03097	5.88109e-05	1
cg22229828	0.983424	0.975436	0.991477	5.89568e-05	1
cg06907141	0.703683	0.592793	0.835315	5.9026e-05	1
cg02359186	0.976168	0.964746	0.987726	5.91148e-05	1
cg09169615	0.740349	0.639306	0.857362	5.93166e-05	1
cg24400517	0.981705	0.972895	0.990595	5.95562e-05	1
cg13647706	1.04788	1.02422	1.07208	5.97389e-05	1
cg24436264	0.948757	0.924694	0.973446	5.98714e-05	1
cg10853086	0.984632	0.977211	0.992109	6.00932e-05	1
cg01616356	0.983724	0.975869	0.991643	6.03501e-05	1
cg01763636	0.968285	0.953155	0.983654	6.04418e-05	1
cg22111705	0.950978	0.927901	0.974629	6.06462e-05	1
cg12548088	0.974328	0.962022	0.986792	6.07041e-05	1
cg14866866	0.961232	0.94283	0.979993	6.09361e-05	1
cg00005437	0.977872	0.967232	0.988629	6.10464e-05	1
cg05853656	0.978502	0.968158	0.988955	6.11325e-05	1
cg09247880	0.869348	0.811818	0.930956	6.12439e-05	1
cg27495109	0.822768	0.747888	0.905145	6.14946e-05	1
cg23243718	0.653607	0.530854	0.804746	6.1572e-05	1
cg07759394	1.01517	1.00772	1.02268	6.16027e-05	1
cg02343871	0.925631	0.891288	0.961298	6.17225e-05	1
cg09276655	0.985435	0.978382	0.992539	6.24713e-05	1
cg08700284	0.987509	0.981449	0.993606	6.27482e-05	1
cg07197059	0.990299	0.985581	0.995039	6.30106e-05	1
cg01631764	1.06325	1.03178	1.09569	6.33366e-05	1
cg04867146	0.970352	0.956144	0.98477	6.35538e-05	1
cg04231772	0.942424	0.915423	0.970222	6.38108e-05	1
cg00456343	1.0042	1.00214	1.00626	6.40509e-05	1
cg05047367	0.800084	0.717183	0.892567	6.43118e-05	1
cg19001703	0.878095	0.823841	0.935922	6.46648e-05	1
cg16097329	0.982383	0.973853	0.990987	6.47238e-05	1
cg02625725	0.983597	0.975646	0.991613	6.50312e-05	1
cg16618260	0.986029	0.979243	0.992862	6.52264e-05	1
cg15468129	0.957787	0.937721	0.978282	6.53848e-05	1
cg24941797	0.695753	0.582246	0.831388	6.54964e-05	1
cg13303459	1.06752	1.03381	1.10233	6.57467e-05	1
cg20982606	0.97774	0.966989	0.98861	6.59017e-05	1
cg12097945	0.642191	0.516624	0.798277	6.61985e-05	1
cg27217878	0.888551	0.83843	0.941669	6.64103e-05	1
cg10646254	0.982102	0.97342	0.990861	6.70489e-05	1
cg05317275	1.01457	1.00738	1.02182	6.73941e-05	1
cg13818875	0.897362	0.850777	0.946497	6.84451e-05	1
cg11071070	0.94268	0.915683	0.970474	6.84634e-05	1
cg27362927	0.678635	0.560732	0.821329	6.84938e-05	1
cg23916948	0.795678	0.711002	0.890438	6.85434e-05	1
cg01143204	0.882746	0.830158	0.938664	6.89683e-05	1
cg18954700	1.02211	1.01116	1.03318	6.91555e-05	1
cg13071729	1.01965	1.00992	1.02947	6.92642e-05	1
cg02349669	0.964611	0.947639	0.981886	6.94072e-05	1
cg18850112	0.989094	0.983762	0.994454	6.98412e-05	1
cg26608798	0.984998	0.977688	0.992364	6.99151e-05	1
cg11723280	0.983156	0.974955	0.991427	7.04872e-05	1
cg20449833	0.974581	0.962285	0.987035	7.056e-05	1
cg18132058	0.965496	0.948912	0.982369	7.11946e-05	1
cg20440093	0.986654	0.980133	0.993219	7.15564e-05	1
cg01584401	0.897969	0.851504	0.94697	7.18758e-05	1
cg27653394	0.949324	0.925259	0.974014	7.19314e-05	1
cg26662201	0.981964	0.973177	0.99083	7.22087e-05	1
cg16530760	0.959898	0.940691	0.979497	7.22611e-05	1
cg02932167	0.986399	0.97975	0.993093	7.23508e-05	1
cg07573715	0.985234	0.97802	0.9925	7.25278e-05	1
cg20313951	0.985264	0.978066	0.992516	7.25639e-05	1
cg03905905	0.77546	0.683901	0.879276	7.28022e-05	1
cg05457923	1.03073	1.01542	1.04626	7.36489e-05	1
cg05508875	0.960259	0.941193	0.979712	7.39748e-05	1
cg07638871	0.973679	0.960919	0.986608	7.39894e-05	1
cg00119986	0.980796	0.971433	0.990249	7.42736e-05	1
cg08802604	1.09862	1.04866	1.15096	7.47586e-05	1
cg25028293	0.979704	0.96981	0.989699	7.51885e-05	1
cg19321126	0.873174	0.816467	0.933819	7.53916e-05	1
cg04422991	0.899728	0.853865	0.948054	7.54878e-05	1
cg11475332	0.776639	0.685268	0.880194	7.55061e-05	1
cg15242061	0.986308	0.979597	0.993065	7.55868e-05	1
cg17615744	0.824217	0.748931	0.907071	7.63196e-05	1
cg11832717	0.978789	0.968446	0.989243	7.64085e-05	1
cg18605975	1.01973	1.0099	1.02966	7.70256e-05	1
cg24761366	0.99114	0.986777	0.995523	7.7142e-05	1
cg04644773	1.03061	1.01532	1.04614	7.72653e-05	1
cg18565342	0.990958	0.986504	0.995431	7.73218e-05	1
cg07379893	0.990112	0.985245	0.995003	7.7419e-05	1
cg03457197	0.876301	0.820756	0.935606	7.74473e-05	1
cg20309794	1.05106	1.02542	1.07735	7.76032e-05	1
cg14255256	1.01131	1.00569	1.01697	7.76481e-05	1
cg06437774	0.957682	0.937361	0.978444	7.77001e-05	1
cg05496229	0.970462	0.956135	0.985005	7.78652e-05	1
cg02796258	0.895328	0.847534	0.945816	7.80737e-05	1
cg03854098	1.00704	1.00354	1.01055	7.80794e-05	1
cg26586027	0.990778	0.986234	0.995344	7.82094e-05	1
cg12623930	0.967133	0.951227	0.983305	7.82109e-05	1
cg09484852	1.01484	1.00745	1.02229	7.86238e-05	1
cg26869506	1.00969	1.00487	1.01454	7.90814e-05	1
cg11499772	0.805179	0.72304	0.896649	7.91126e-05	1
cg07830110	0.951878	0.928847	0.97548	7.92615e-05	1
cg22250586	0.979295	0.969172	0.989525	7.9402e-05	1
cg04597389	0.831127	0.758164	0.911111	7.95701e-05	1
cg02765403	0.986842	0.98037	0.993357	7.96123e-05	1
cg06960514	0.975928	0.964186	0.987813	7.96667e-05	1
cg04689379	0.980945	0.971613	0.990365	7.97292e-05	1
cg17071181	0.96703	0.951056	0.983273	7.98678e-05	1
cg21495772	0.977272	0.966172	0.9885	7.99877e-05	1
cg02131049	1.07917	1.03908	1.12082	8.00101e-05	1
cg20451722	0.818479	0.740922	0.904153	8.0252e-05	1
cg04925864	0.971878	0.958194	0.985757	8.05721e-05	1
cg15427448	1.04033	1.02008	1.06098	8.06082e-05	1
cg15875120	0.871431	0.813774	0.933172	8.13737e-05	1
cg03471436	0.985195	0.977912	0.992533	8.15744e-05	1
cg01408558	0.982641	0.974117	0.99124	8.17021e-05	1
cg12837296	0.980301	0.970645	0.990053	8.17282e-05	1
cg17171801	1.10085	1.04946	1.15475	8.17462e-05	1
cg11235697	1.02532	1.01264	1.03815	8.18571e-05	1
cg02249930	0.819767	0.742563	0.904997	8.21673e-05	1
cg09848445	0.985162	0.977859	0.99252	8.2352e-05	1
cg00297950	1.01066	1.00534	1.01602	8.2597e-05	1
cg03446427	0.986008	0.979115	0.992951	8.27625e-05	1
cg12611135	0.972202	0.958647	0.985948	8.30085e-05	1
cg06774087	0.99116	0.986785	0.995554	8.34048e-05	1
cg15337035	0.971164	0.95711	0.985425	8.35031e-05	1
cg25123362	1.00725	1.00363	1.01087	8.36487e-05	1
cg07798143	1.03249	1.01617	1.04907	8.40432e-05	1
cg05700333	0.95161	0.928373	0.97543	8.4172e-05	1
cg11414046	0.921749	0.885046	0.959975	8.48382e-05	1
cg18291664	0.979708	0.969742	0.989777	8.50891e-05	1
cg22918560	1.01071	1.00536	1.0161	8.50938e-05	1
cg02747390	0.970034	0.95542	0.984871	8.55607e-05	1
cg10668067	0.976766	0.965375	0.988292	8.58207e-05	1
cg18553354	0.829974	0.75626	0.910872	8.5953e-05	1
cg20629587	0.985935	0.978989	0.99293	8.60247e-05	1
cg01002560	0.988305	0.982517	0.994126	8.64083e-05	1
cg25804447	0.977608	0.966617	0.988724	8.64504e-05	1
cg14428767	0.849169	0.782603	0.921396	8.65346e-05	1
cg16752029	0.864145	0.803379	0.929507	8.67419e-05	1
cg26203563	0.968653	0.953365	0.984185	8.70826e-05	1
cg10501036	0.950752	0.927066	0.975043	8.72762e-05	1
cg00509507	0.781317	0.690688	0.883838	8.74797e-05	1
cg10396423	0.989461	0.984234	0.994715	8.82773e-05	1
cg02313495	0.988856	0.98333	0.994412	8.85875e-05	1
cg03936250	0.749273	0.648573	0.865608	8.86024e-05	1
cg11316940	0.744939	0.642942	0.863117	8.87849e-05	1
cg13731609	0.977029	0.96574	0.988451	8.89525e-05	1
cg03455713	0.984886	0.977412	0.992417	8.90896e-05	1
cg03399398	0.883336	0.830191	0.939883	8.91628e-05	1
cg08152564	0.901781	0.856332	0.949642	8.91773e-05	1
cg21018997	1.0084	1.00419	1.01263	8.92963e-05	1
cg03364015	0.981373	0.972182	0.990651	8.98235e-05	1
cg18190219	0.986637	0.980017	0.993302	8.98609e-05	1
cg17969789	0.983111	0.974766	0.991529	9.01162e-05	1
cg14907738	0.980232	0.970483	0.990079	9.03867e-05	1
cg10708221	1.03014	1.01493	1.04557	9.09414e-05	1
cg15297110	0.863872	0.802826	0.92956	9.09903e-05	1
cg04515200	0.992845	0.98928	0.996422	9.11458e-05	1
cg17398283	1.02463	1.01222	1.03719	9.12716e-05	1
cg19990379	0.949535	0.925219	0.974491	9.14632e-05	1
cg00206058	0.975826	0.963935	0.987864	9.16172e-05	1
cg13525448	1.01287	1.0064	1.01939	9.16937e-05	1
cg06486994	0.978676	0.968159	0.989307	9.22053e-05	1
cg24685837	0.977116	0.96584	0.988524	9.26717e-05	1
cg18471474	1.06842	1.03354	1.10448	9.29029e-05	1
cg23798332	0.924867	0.889336	0.961819	9.32096e-05	1
cg22762615	1.04481	1.02207	1.06805	9.41322e-05	1
cg05597908	0.979098	0.968769	0.989538	9.47774e-05	1
cg14104257	0.839436	0.768813	0.916546	9.48393e-05	1
cg26019096	0.77523	0.6822	0.880947	9.48609e-05	1
cg10967735	0.991727	0.987598	0.995873	9.49711e-05	1
cg15211621	0.926162	0.891164	0.962535	9.50707e-05	1
cg17257944	0.96865	0.953279	0.98427	9.51824e-05	1
cg22814247	0.712921	0.601471	0.845022	9.56027e-05	1
cg26411452	0.982197	0.97337	0.991104	9.61794e-05	1
cg25059165	1.03697	1.01822	1.05607	9.63836e-05	1
cg23233605	0.96229	0.943874	0.981065	9.65704e-05	1
cg26610812	1.06919	1.03383	1.10577	9.67835e-05	1
cg18084215	1.16419	1.0785	1.25668	9.7251e-05	1
cg10342490	0.991646	0.987471	0.995839	9.73864e-05	1
cg17315833	1.03531	1.0174	1.05354	9.76015e-05	1
cg02294146	0.928896	0.895062	0.964009	9.76993e-05	1
cg17631042	0.704394	0.590511	0.840241	9.83822e-05	1
cg13053783	0.827445	0.752205	0.91021	9.85337e-05	1
cg17787710	0.975079	0.96277	0.987545	9.87802e-05	1
cg12501546	0.980252	0.970458	0.990144	9.88842e-05	1
cg08530610	0.983261	0.974935	0.991658	9.99433e-05	1
cg04153890	0.887515	0.835732	0.942506	0.000100049	1
cg10809449	0.984684	0.977057	0.992372	0.000100282	1
cg00706441	0.98929	0.983936	0.994674	0.000100763	1
cg17042098	1.00978	1.00484	1.01475	0.000100799	1
cg02194717	0.978722	0.968168	0.98939	0.000100958	1
cg03646569	0.978651	0.968061	0.989357	0.000101308	1
cg09177567	1.01624	1.00802	1.02453	0.000101487	1
cg01068014	0.955565	0.933913	0.97772	0.000101598	1
cg24440468	1.05344	1.02614	1.08147	0.000101719	1
cg19779670	1.01426	1.00704	1.02153	0.000101877	1
cg10729111	0.978077	0.967202	0.989075	0.000102083	1
cg04731618	0.954959	0.933012	0.977422	0.000102322	1
cg22608999	0.853089	0.787306	0.924368	0.000104116	1
cg23172898	0.788051	0.698719	0.888805	0.000104363	1
cg00683496	0.981988	0.973013	0.991047	0.000104646	1
cg10070151	0.977245	0.965946	0.988676	0.000104768	1
cg04128483	0.93517	0.904031	0.967383	0.000104814	1
cg04772025	1.01382	1.00681	1.02088	0.000105113	1
cg19301658	1.24109	1.11264	1.38437	0.000106742	1
cg02482346	0.985285	0.977924	0.992701	0.000106752	1
cg22846809	0.983247	0.974879	0.991687	0.000106983	1
cg08107701	0.903034	0.857614	0.950859	0.000107169	1
cg18648031	0.983927	0.975885	0.992035	0.000108861	1
cg09570566	0.944236	0.917192	0.972078	0.000108864	1
cg27424226	1.05852	1.02846	1.08946	0.000109111	1
cg14305420	0.938763	0.909188	0.969299	0.000109202	1
cg10804363	0.9582	0.937696	0.979151	0.000109228	1
cg03180191	0.875794	0.818882	0.936661	0.000109424	1
cg17228093	0.984562	0.97683	0.992356	0.00011002	1
cg26278703	0.907977	0.86462	0.953508	0.000110174	1
cg01561528	0.984541	0.976796	0.992347	0.000110331	1
cg13279009	0.985487	0.97821	0.992818	0.000110521	1
cg08888439	0.824544	0.74772	0.909262	0.000110532	1
cg23087992	1.01863	1.00914	1.02821	0.000110546	1
cg02078517	0.967881	0.951993	0.984035	0.000110733	1
cg06447552	1.01338	1.00657	1.02023	0.000111107	1
cg03936955	0.883846	0.830183	0.940977	0.000111723	1
cg26002253	0.672004	0.549273	0.822157	0.000111942	1
cg05413451	0.899342	0.852204	0.949088	0.000112341	1
cg23115083	0.978033	0.967069	0.989122	0.000112727	1
cg06030229	0.86378	0.801893	0.930442	0.000113064	1
cg13234063	1.02954	1.01443	1.04487	0.0001135	1
cg08367026	0.772713	0.677877	0.880817	0.000113611	1
cg01406145	0.983186	0.974753	0.991692	0.000114298	1
cg20824576	0.625407	0.49272	0.793827	0.00011446	1
cg17947242	0.978364	0.967548	0.989302	0.000115151	1
cg05873873	0.93092	0.897659	0.965413	0.000115191	1
cg23370213	1.01384	1.00678	1.02095	0.000115458	1
cg23472215	1.01306	1.0064	1.01976	0.000115524	1
cg09606208	0.96818	0.952394	0.984229	0.000115613	1
cg17745251	0.978353	0.967529	0.989299	0.000115615	1
cg09131135	0.777801	0.684518	0.883796	0.000115684	1
cg09857149	0.969132	0.953805	0.984706	0.00011588	1
cg03109066	0.787479	0.69739	0.889207	0.000116053	1
cg14063129	0.960496	0.941008	0.980388	0.000116293	1
cg19676238	0.952978	0.929913	0.976615	0.000116712	1
cg01488306	0.988448	0.982622	0.994308	0.000116853	1
cg13961400	0.985466	0.978153	0.992834	0.000116914	1
cg15581305	0.940817	0.912058	0.970482	0.000117355	1
cg04138881	0.98739	0.981034	0.993787	0.000117374	1
cg25241845	0.792367	0.703861	0.892001	0.00011755	1
cg13083523	0.866408	0.805423	0.932012	0.000117791	1
cg17937102	0.910573	0.868174	0.955044	0.000117792	1
cg18505871	0.980335	0.970474	0.990297	0.000117967	1
cg13852561	0.983402	0.975059	0.991817	0.000118069	1
cg17052816	0.964274	0.946581	0.982299	0.000118072	1
cg12417362	1.01229	1.00601	1.0186	0.000118301	1
cg02224755	0.972522	0.958824	0.986417	0.000118371	1
cg13361920	0.963389	0.945266	0.981859	0.000118399	1
cg01435574	1.02291	1.01118	1.03478	0.00011861	1
cg19132069	0.981819	0.972688	0.991036	0.000118663	1
cg04539895	0.986463	0.979639	0.993334	0.000118779	1
cg07287463	0.984543	0.976761	0.992386	0.000119173	1
cg09461388	0.988702	0.982994	0.994443	0.000119809	1
cg11198912	0.935843	0.904741	0.968013	0.000120457	1
cg13183628	0.786797	0.696249	0.889121	0.000121087	1
cg25626012	0.98202	0.972976	0.991147	0.000121152	1
cg01290153	0.992539	0.988756	0.996337	0.000121258	1
cg21568368	0.989316	0.983911	0.99475	0.000121527	1
cg19675778	1.01733	1.00845	1.02628	0.000121746	1
cg09382430	0.95087	0.926742	0.975625	0.000122152	1
cg13403760	1.06246	1.03012	1.09581	0.000122365	1
cg25512657	0.964107	0.946289	0.98226	0.000122682	1
cg20098015	0.988279	0.98235	0.994243	0.000122809	1
cg06191810	1.05825	1.02811	1.08928	0.000122845	1
cg26985447	0.985976	0.978895	0.993109	0.000122869	1
cg01094301	0.983423	0.975068	0.99185	0.000123067	1
cg16590466	0.98082	0.971172	0.990565	0.000123272	1
cg08573648	1.02569	1.01249	1.03906	0.00012346	1
cg27300647	0.984577	0.976795	0.992422	0.000123683	1
cg25353308	1.03171	1.0154	1.04829	0.00012385	1
cg20960443	0.911115	0.868815	0.955475	0.000124152	1
cg13804854	0.981016	0.971459	0.990666	0.000124212	1
cg13884115	0.960002	0.940193	0.980228	0.000124412	1
cg21680178	0.735132	0.628211	0.86025	0.000124487	1
cg19654846	0.944308	0.917068	0.972357	0.00012454	1
cg18080819	0.986645	0.979891	0.993444	0.000124564	1
cg08509236	0.980908	0.971295	0.990615	0.000124788	1
cg01906905	0.978609	0.967856	0.98948	0.000125001	1
cg07016184	1.01362	1.00664	1.02065	0.000125359	1
cg00795535	0.926247	0.890684	0.96323	0.000125368	1
cg09802627	0.979705	0.969492	0.990026	0.000125706	1
cg05788437	0.968859	0.953316	0.984655	0.000126008	1
cg11032474	0.939127	0.90945	0.969772	0.000126357	1
cg03865257	1.02966	1.01439	1.04517	0.000126385	1
cg05792124	0.849393	0.781374	0.923333	0.000126595	1
cg08726598	0.990171	0.985181	0.995185	0.000126869	1
cg09700990	0.959246	0.939046	0.97988	0.00012726	1
cg01715842	0.9744	0.961554	0.987418	0.000128191	1
cg27113347	0.986653	0.979891	0.993462	0.000128435	1
cg13410755	0.88581	0.832502	0.942531	0.000128688	1
cg01557648	0.979873	0.969723	0.990129	0.000129527	1
cg20918243	1.05222	1.02514	1.08	0.000129613	1
cg12546745	0.984354	0.976436	0.992336	0.000129697	1
cg22811387	1.0527	1.02536	1.08076	0.0001302	1
cg25127896	0.83449	0.760598	0.91556	0.000130831	1
cg00728602	0.963826	0.945799	0.982197	0.000130951	1
cg20150189	0.988801	0.98311	0.994524	0.000131048	1
cg08757721	0.950705	0.926391	0.975657	0.000131135	1
cg00216504	0.970945	0.956383	0.985729	0.000131169	1
cg01345406	0.876917	0.819829	0.937979	0.00013121	1
cg16357582	0.986614	0.979823	0.993452	0.000131228	1
cg04956790	0.964399	0.946645	0.982486	0.000131466	1
cg13277160	0.891461	0.840474	0.945541	0.000131567	1
cg24110768	0.953526	0.930546	0.977073	0.000131587	1
cg06366107	0.992441	0.988587	0.996309	0.000132036	1
cg02987163	0.8842	0.830125	0.941797	0.000132184	1
cg01755541	0.990355	0.985446	0.995289	0.000132198	1
cg16963426	0.988913	0.983272	0.994587	0.000133778	1
cg12718502	0.979048	0.968467	0.989745	0.00013383	1
cg13792506	0.795138	0.706883	0.894412	0.000134026	1
cg13650484	0.972513	0.958697	0.986528	0.000134563	1
cg17721618	0.978886	0.968219	0.989671	0.000134916	1
cg12763971	0.87636	0.818925	0.937824	0.000135607	1
cg15110296	0.985153	0.977613	0.992751	0.000135745	1
cg00262280	0.846209	0.776651	0.921996	0.000135775	1
cg27422420	0.964735	0.947104	0.982694	0.000136153	1
cg08206623	0.986844	0.980152	0.993582	0.000136428	1
cg16076930	0.981254	0.97176	0.990842	0.00013649	1
cg18511153	0.908105	0.864218	0.95422	0.000136647	1
cg01704976	0.899852	0.852353	0.949997	0.000136773	1
cg22375192	1.01403	1.0068	1.02133	0.000137247	1
cg00518623	0.982216	0.973197	0.991318	0.000137345	1
cg05303842	0.982664	0.973869	0.991539	0.000137673	1
cg15108705	1.02717	1.01311	1.04143	0.000137988	1
cg27269899	1.07827	1.03728	1.12087	0.000138213	1
cg24119722	0.982981	0.974339	0.991699	0.000138936	1
cg19458497	0.990127	0.985085	0.995195	0.000139388	1
cg12804755	0.991221	0.986733	0.995729	0.000139708	1
cg16523380	1.01466	1.00709	1.02229	0.000140815	1
cg24464927	0.917795	0.878139	0.959242	0.000140978	1
cg18684755	1.00679	1.00329	1.01031	0.000141161	1
cg06922130	0.970454	0.955581	0.985558	0.000141195	1
cg04118519	0.977632	0.966307	0.98909	0.000141691	1
cg24554059	0.896251	0.847079	0.948277	0.000141986	1
cg06389934	0.751745	0.648961	0.870808	0.000142328	1
cg09529655	0.938786	0.908723	0.969844	0.000142442	1
cg26085197	0.956656	0.935061	0.978751	0.000142586	1
cg20726575	1.0125	1.00604	1.019	0.000142914	1
cg09303161	0.9412	0.912259	0.971059	0.000142949	1
cg16171867	0.890553	0.838907	0.94538	0.000143151	1
cg14902204	0.991287	0.986826	0.995769	0.000143337	1
cg03149496	1.07229	1.03439	1.11158	0.000143689	1
cg01002690	0.963856	0.945735	0.982325	0.000143844	1
cg12399453	0.781634	0.68837	0.887534	0.000144494	1
cg25028855	1.00891	1.0043	1.01353	0.000144518	1
cg21600965	0.743212	0.637725	0.866147	0.000144749	1
cg06994589	0.982967	0.974295	0.991717	0.000144934	1
cg04650641	0.873718	0.814944	0.936731	0.000144987	1
cg05845765	0.984861	0.97714	0.992642	0.000145167	1
cg08073591	1.02504	1.01204	1.03821	0.000145429	1
cg01485010	0.914868	0.873813	0.957853	0.000145811	1
cg04275985	0.737605	0.630389	0.863055	0.000146037	1
cg00997699	0.979891	0.96967	0.99022	0.000146448	1
cg21761922	1.02307	1.0111	1.03519	0.000146528	1
cg14504479	0.85416	0.787403	0.926578	0.000146711	1
cg16408938	0.890344	0.838525	0.945364	0.000146783	1
cg00160302	0.971172	0.956614	0.985951	0.000147061	1
cg15436476	0.970132	0.95506	0.985441	0.000147162	1
cg10197263	0.99162	0.98732	0.995938	0.000147306	1
cg08991599	1.08096	1.03837	1.12531	0.000147313	1
cg09226173	0.912222	0.869945	0.956553	0.000147891	1
cg18619541	0.721705	0.609818	0.854122	0.000147904	1
cg08128789	0.861012	0.79696	0.930211	0.000148142	1
cg00339331	0.989062	0.983457	0.994699	0.000148983	1
cg13398135	0.865282	0.802935	0.932471	0.000149195	1
cg03160883	1.00906	1.00436	1.01377	0.00014986	1
cg17578903	0.863755	0.800765	0.931699	0.000149968	1
cg03274794	0.989768	0.984519	0.995045	0.000150101	1
cg14008506	0.989774	0.984527	0.995048	0.000150426	1
cg02072940	0.977997	0.966809	0.989314	0.000150526	1
cg26045119	1.08498	1.04017	1.13171	0.000150578	1
cg06179971	0.981634	0.972268	0.99109	0.000150753	1
cg10519492	0.781596	0.688068	0.887837	0.000150963	1
cg21158935	1.02222	1.01067	1.03391	0.000151111	1
cg08743556	0.905466	0.860129	0.953192	0.000151171	1
cg14068796	1.16956	1.07852	1.26828	0.000151785	1
cg01294702	0.990917	0.986248	0.995607	0.00015222	1
cg16656232	1.01555	1.00747	1.02369	0.000152285	1
cg06258549	0.986601	0.979738	0.993513	0.000152305	1
cg03499570	0.986497	0.97958	0.993462	0.000152311	1
cg03506640	1.00876	1.00422	1.01333	0.000152737	1
cg01093296	0.98423	0.976165	0.992361	0.000152755	1
cg07701443	0.952123	0.928246	0.976615	0.000153043	1
cg06284901	0.94138	0.912396	0.971284	0.000153053	1
cg14947789	0.75626	0.654419	0.873949	0.00015326	1
cg01308258	0.990651	0.985844	0.995481	0.000153835	1
cg11949654	0.936045	0.904547	0.96864	0.000154094	1
cg05712524	0.989344	0.983869	0.99485	0.000154797	1
cg06507634	0.991257	0.986758	0.995777	0.000154906	1
cg06897334	0.866575	0.804591	0.933334	0.000155572	1
cg14513781	0.939282	0.909279	0.970276	0.000155758	1
cg08192560	0.868344	0.807079	0.93426	0.000155858	1
cg25339112	0.991062	0.986461	0.995686	0.000156279	1
cg11809162	0.984603	0.976714	0.992556	0.000156521	1
cg10059178	0.883378	0.82837	0.942038	0.000156689	1
cg15565872	1.03217	1.01536	1.04926	0.000156817	1
cg00872628	0.792636	0.702656	0.89414	0.000156841	1
cg20704442	0.991877	0.98769	0.996081	0.00015718	1
cg20448129	0.899131	0.850882	0.950115	0.000157821	1
cg09481056	0.981995	0.972783	0.991294	0.000157847	1
cg09896503	0.963849	0.945612	0.982438	0.000158189	1
cg04931090	0.959264	0.938782	0.980194	0.000159026	1
cg22091918	0.906648	0.861682	0.953961	0.000159384	1
cg17460441	1.02111	1.0101	1.03225	0.00015944	1
cg19971804	0.892357	0.841131	0.946703	0.000159537	1
cg25441231	0.862155	0.79825	0.931176	0.000160205	1
cg05601012	1.06513	1.03079	1.10061	0.00016076	1
cg21261027	0.901147	0.853721	0.951208	0.000161024	1
cg12464233	0.793345	0.703458	0.894718	0.000161183	1
cg23336647	0.856167	0.789797	0.928114	0.000161915	1
cg20366258	0.979137	0.968467	0.989924	0.000162343	1
cg13962513	0.856942	0.790869	0.928535	0.000162502	1
cg16702934	0.965565	0.948133	0.983318	0.000163391	1
cg25727806	0.940209	0.910544	0.970842	0.000163897	1
cg25808157	0.97771	0.966313	0.98924	0.00016424	1
cg06094126	0.981544	0.972076	0.991103	0.000165173	1
cg20597908	0.78924	0.69778	0.892688	0.000165629	1
cg01674130	0.988922	0.983205	0.994671	0.00016569	1
cg07183316	0.945091	0.917718	0.973281	0.000165885	1
cg21683708	1.01026	1.00491	1.01564	0.000166117	1
cg05941025	0.987676	0.981322	0.994072	0.000166417	1
cg06421104	0.981621	0.972187	0.991147	0.000166724	1
cg18242131	1.027	1.01285	1.04134	0.000166991	1
cg16005989	0.797959	0.709484	0.897466	0.000167099	1
cg15174463	0.843826	0.772418	0.921837	0.00016721	1
cg03449513	0.991479	0.98707	0.995908	0.000167539	1
cg20959676	0.837913	0.764181	0.91876	0.000167954	1
cg07141565	0.984926	0.977164	0.992749	0.000168071	1
cg15315312	0.940235	0.910532	0.970906	0.000168095	1
cg06214220	0.893253	0.842235	0.947362	0.000168528	1
cg08765940	0.987025	0.980332	0.993764	0.000168544	1
cg12204362	0.80439	0.718148	0.900989	0.000168661	1
cg00094944	0.956622	0.934772	0.978983	0.00016875	1
cg16416152	0.971662	0.957214	0.986327	0.000169069	1
cg07379000	0.913574	0.871534	0.957642	0.000169493	1
cg16141316	1.06187	1.02916	1.09563	0.000169496	1
cg08792416	0.970711	0.955788	0.985868	0.000169536	1
cg05169312	1.00941	1.00449	1.01435	0.000169778	1
cg12274508	1.04089	1.01937	1.06286	0.000169786	1
cg18586343	0.701725	0.583416	0.844026	0.00016994	1
cg13394305	1.02859	1.01359	1.04382	0.000170139	1
cg07206840	0.849617	0.780404	0.924968	0.000170611	1
cg04568264	0.971734	0.957314	0.986371	0.000170624	1
cg14892058	0.898045	0.849076	0.949838	0.000170682	1
cg08304887	0.847352	0.777227	0.923805	0.00017116	1
cg10693065	0.961773	0.942418	0.981525	0.000171365	1
cg24089932	0.981747	0.97236	0.991226	0.000171539	1
cg22139983	0.986399	0.979378	0.99347	0.000171658	1
cg22331666	0.98175	0.972363	0.991228	0.000171748	1
cg00238897	1.01747	1.00832	1.02671	0.000172124	1
cg04477202	0.966341	0.949232	0.983758	0.000172195	1
cg07355841	1.00877	1.00418	1.01338	0.000172396	1
cg17021265	0.811682	0.727932	0.905068	0.000173238	1
cg03632204	0.973814	0.960419	0.987395	0.000173361	1
cg11151524	0.886182	0.832015	0.943876	0.000173454	1
cg00991475	0.851442	0.78288	0.926009	0.000173594	1
cg13404054	1.0088	1.00419	1.01342	0.000173718	1
cg05104080	0.984454	0.976435	0.99254	0.000173886	1
cg06489744	0.987995	0.981784	0.994246	0.000174444	1
cg08822715	0.983381	0.974813	0.992025	0.000174544	1
cg00245789	0.905965	0.860427	0.953914	0.000174669	1
cg04114665	0.983767	0.975394	0.992213	0.000175065	1
cg08745599	0.778332	0.68284	0.887179	0.000175116	1
cg08075060	0.610507	0.471786	0.790016	0.000175309	1
cg19789848	0.883957	0.828794	0.942792	0.000175556	1
cg08487909	0.989366	0.983856	0.994907	0.000175602	1
cg18036734	0.985975	0.978725	0.993278	0.000175919	1
cg22367556	0.9904	0.98542	0.995405	0.000176425	1
cg12255318	0.746847	0.641185	0.86992	0.000176499	1
cg19366986	0.970071	0.954788	0.985598	0.000176577	1
cg09605494	1.02209	1.01049	1.03383	0.000176645	1
cg13684188	0.819209	0.738128	0.909197	0.000176745	1
cg27216355	0.918871	0.879119	0.96042	0.000177022	1
cg11223735	0.987589	0.981163	0.994057	0.000177031	1
cg09804398	1.07554	1.03537	1.11727	0.000177317	1
cg24914313	0.983369	0.974785	0.992029	0.000177609	1
cg12401058	0.987717	0.981355	0.99412	0.000177734	1
cg22122013	0.986866	0.980068	0.993711	0.000177755	1
cg04784546	0.71359	0.598168	0.851284	0.000177865	1
cg04367197	1.08979	1.04187	1.1399	0.000178116	1
cg15611556	0.992143	0.988059	0.996244	0.000178195	1
cg13079099	1.03791	1.01791	1.05831	0.000178219	1
cg08955754	0.92445	0.887241	0.963219	0.000178381	1
cg24792272	1.28184	1.12573	1.4596	0.000178624	1
cg09045196	0.984456	0.976422	0.992557	0.000179122	1
cg19988162	1.01126	1.00535	1.0172	0.000179332	1
cg17217677	0.983127	0.974412	0.991919	0.000179533	1
cg12234855	1.04632	1.02182	1.0714	0.000180002	1
cg02253236	0.990409	0.985426	0.995418	0.000180784	1
cg18070676	1.00807	1.00384	1.01232	0.000180816	1
cg00175980	0.890916	0.838645	0.946445	0.000180943	1
cg04621676	0.964491	0.946408	0.98292	0.000181124	1
cg18705808	0.984251	0.976105	0.992464	0.000181172	1
cg23373626	0.984149	0.975951	0.992416	0.000181258	1
cg03191565	0.833602	0.75784	0.916938	0.000181336	1
cg08872713	0.844132	0.772468	0.922443	0.00018151	1
cg12833508	0.973763	0.960302	0.987413	0.000181515	1
cg16849041	1.03363	1.01588	1.05168	0.000181562	1
cg02238387	1.01011	1.00481	1.01545	0.000181572	1
cg15605897	0.759786	0.657991	0.877329	0.000181712	1
cg09818632	0.980461	0.970383	0.990644	0.000181772	1
cg00212988	1.02108	1.00998	1.03229	0.000181946	1
cg25641997	0.936491	0.904851	0.969238	0.000182779	1
cg01843367	0.965612	0.948073	0.983475	0.000182823	1
cg16945982	0.920025	0.880712	0.961093	0.000183283	1
cg07496078	0.9887	0.98283	0.994606	0.000183875	1
cg13334135	1.01677	1.00794	1.02566	0.000183987	1
cg09030119	0.989527	0.984083	0.995002	0.000184185	1
cg15288140	0.818001	0.736252	0.908826	0.000184345	1
cg03590464	0.928579	0.893204	0.965356	0.000184639	1
cg12478290	0.907494	0.862475	0.954864	0.000184682	1
cg10354859	0.876852	0.818471	0.939397	0.000185231	1
cg01353073	0.985892	0.978574	0.993265	0.000185813	1
cg14437072	0.961187	0.94144	0.981349	0.000185829	1
cg16141690	0.932277	0.89861	0.967204	0.000186313	1
cg23719322	1.09473	1.04397	1.14795	0.000186524	1
cg16574065	0.954724	0.931799	0.978214	0.00018683	1
cg10121294	0.973383	0.959705	0.987257	0.00018683	1
cg00423487	0.98298	0.974166	0.991874	0.000187465	1
cg18735615	0.888661	0.83529	0.945442	0.000187469	1
cg15972264	1.00991	1.0047	1.01515	0.000187871	1
cg22117850	0.98805	0.981836	0.994303	0.000187898	1
cg01150936	0.982368	0.973239	0.991582	0.000187966	1
cg01639485	0.802481	0.714954	0.900723	0.000188172	1
cg08649954	0.920152	0.880826	0.961233	0.000188337	1
cg26253974	0.960079	0.939766	0.980832	0.000188617	1
cg01000408	0.95813	0.936856	0.979888	0.000188975	1
cg09183941	0.85148	0.782554	0.926477	0.000189142	1
cg01215442	0.990661	0.985792	0.995553	0.000189346	1
cg05261496	0.974858	0.96191	0.987981	0.000189664	1
cg15554505	0.987539	0.981058	0.994064	0.000189777	1
cg26908388	0.991651	0.987294	0.996027	0.000190241	1
cg18163062	0.976775	0.964792	0.988906	0.000190401	1
cg04140974	0.981847	0.972444	0.99134	0.000190425	1
cg21967668	0.986146	0.978946	0.993399	0.000190428	1
cg05145963	0.979127	0.968338	0.990036	0.000190453	1
cg24334833	0.981393	0.971758	0.991124	0.000190603	1
cg14892570	0.981924	0.972559	0.991379	0.000190803	1
cg24404083	0.882148	0.825907	0.942219	0.000190947	1
cg20271029	1.01542	1.00729	1.02362	0.000191123	1
cg00406338	0.987476	0.980959	0.994036	0.000191125	1
cg00818828	0.955734	0.933266	0.978743	0.000191345	1
cg27639575	0.989863	0.984578	0.995176	0.000191365	1
cg25008614	0.989829	0.984525	0.995162	0.00019231	1
cg25284492	0.918344	0.878126	0.960403	0.000192809	1
cg24060136	0.790889	0.699118	0.894708	0.00019304	1
cg22334543	0.951317	0.92668	0.97661	0.000193128	1
cg15830441	0.960789	0.940787	0.981215	0.00019395	1
cg11485602	0.876294	0.817488	0.93933	0.000194624	1
cg13049862	0.987104	0.980387	0.993867	0.000194784	1
cg23695504	1.01347	1.00636	1.02063	0.000194834	1
cg20124417	0.960354	0.940131	0.981012	0.000194954	1
cg11733057	0.98405	0.97576	0.99241	0.000195315	1
cg25134758	0.981556	0.971988	0.991219	0.000195685	1
cg26266978	0.885422	0.830497	0.943979	0.00019578	1
cg01252659	0.866701	0.803844	0.934474	0.000195908	1
cg03205764	0.986544	0.979535	0.993603	0.000196139	1
cg18864399	0.979573	0.968988	0.990274	0.000196734	1
cg06235437	0.92953	0.89445	0.965986	0.00019683	1
cg11450744	0.988247	0.982115	0.994417	0.000196842	1
cg11522145	0.983755	0.975307	0.992276	0.000197461	1
cg09554798	0.95983	0.939332	0.980777	0.000197461	1
cg22191741	1.16889	1.07668	1.269	0.000197567	1
cg23668184	1.00843	1.00398	1.0129	0.00019787	1
cg20447656	0.710794	0.593829	0.850797	0.000198108	1
cg01741397	0.91573	0.874241	0.959188	0.000198132	1
cg09693464	0.93443	0.901642	0.96841	0.000198206	1
cg16290301	0.907499	0.862271	0.955099	0.000198261	1
cg04100463	0.927122	0.890896	0.964822	0.000198454	1
cg18321495	0.979752	0.969249	0.990369	0.000199335	1
cg10762132	0.785685	0.691919	0.892158	0.000199355	1
cg12949296	0.913545	0.87104	0.958123	0.000199368	1
cg22915154	0.989979	0.984738	0.995247	0.000199752	1
cg17525674	0.906578	0.860906	0.954674	0.000200242	1
cg14667104	0.975215	0.962401	0.988201	0.000200274	1
cg23392963	0.979385	0.96869	0.990198	0.000200569	1
cg17052041	0.992128	0.988002	0.99627	0.000200829	1
cg02278307	0.920342	0.880937	0.961511	0.000200892	1
cg17792315	1.10011	1.04614	1.15687	0.000201399	1
cg07309136	0.961151	0.941276	0.981444	0.000201655	1
cg07117751	0.985639	0.978149	0.993186	0.000201795	1
cg12720191	0.93389	0.900805	0.96819	0.000201986	1
cg10786622	0.950268	0.925045	0.976179	0.000202006	1
cg08673763	0.974914	0.961937	0.988066	0.000202352	1
cg18762252	1.11487	1.05273	1.18069	0.000202612	1
cg18976869	0.931217	0.896862	0.966889	0.000202734	1
cg22868518	0.963546	0.944855	0.982607	0.000202746	1
cg25402422	0.983107	0.974308	0.991985	0.000203675	1
cg20618610	0.982104	0.972789	0.991508	0.000204017	1
cg15469001	0.980623	0.970548	0.990801	0.000204053	1
cg03638940	0.949412	0.923753	0.975783	0.000204248	1
cg01599904	0.877501	0.819022	0.940156	0.000204289	1
cg11696575	0.856573	0.789359	0.92951	0.000204695	1
cg03617389	0.940497	0.910526	0.971454	0.000205063	1
cg24780981	0.787598	0.69432	0.893407	0.000205227	1
cg16228804	0.749274	0.643364	0.872619	0.000205322	1
cg06008062	0.983863	0.975448	0.99235	0.000205357	1
cg07726085	0.980019	0.969632	0.990518	0.000205424	1
cg14205524	0.928052	0.892177	0.96537	0.000205491	1
cg19540797	0.9696	0.953923	0.985535	0.000205789	1
cg06837242	0.935217	0.90271	0.968894	0.000206702	1
cg14341579	1.02258	1.01059	1.03472	0.000206994	1
cg16046673	0.927314	0.891074	0.965028	0.000207112	1
cg20023898	0.989184	0.983518	0.994883	0.000207175	1
cg03249947	1.03355	1.01569	1.05172	0.000207342	1
cg14093663	0.970394	0.955107	0.985925	0.000207548	1
cg04498802	0.782395	0.687252	0.890709	0.000207681	1
cg04794804	0.748019	0.64164	0.872034	0.000207701	1
cg04558175	0.990452	0.985444	0.995486	0.000207834	1
cg03969957	0.804888	0.717665	0.902711	0.000208118	1
cg04590451	0.979862	0.969383	0.990453	0.000208251	1
cg04406910	0.834769	0.758775	0.918374	0.000208537	1
cg20728105	1.01492	1.00701	1.02289	0.000208578	1
cg15893346	0.978443	0.967237	0.989778	0.000208732	1
cg19435526	0.987859	0.981501	0.994259	0.000209282	1
cg04425419	0.827193	0.748242	0.914474	0.000209848	1
cg24356799	0.840598	0.766856	0.921431	0.000209943	1
cg19234738	0.991783	0.987465	0.99612	0.00021056	1
cg00365505	0.853722	0.78522	0.9282	0.000210656	1
cg04932878	0.98694	0.980102	0.993826	0.000210817	1
cg05521982	0.991308	0.986742	0.995896	0.000211066	1
cg23295991	0.913991	0.871516	0.958536	0.000212056	1
cg18265435	0.97455	0.961345	0.987936	0.000212542	1
cg26959990	0.805045	0.717759	0.902947	0.000212655	1
cg16398362	0.990349	0.985279	0.995445	0.000212748	1
cg24502391	0.970331	0.954979	0.985929	0.000214292	1
cg05331807	0.98955	0.98406	0.995069	0.000214312	1
cg24901063	1.0533	1.02473	1.08267	0.00021445	1
cg11838380	0.819645	0.737714	0.910675	0.000214479	1
cg14011422	0.987606	0.981105	0.99415	0.000214484	1
cg08043233	0.905244	0.858754	0.95425	0.000214849	1
cg06979342	0.957159	0.935212	0.97962	0.000215813	1
cg25921461	1.04436	1.02062	1.06865	0.000215994	1
cg04146982	0.980621	0.970506	0.990841	0.000216052	1
cg13875012	1.02171	1.01015	1.03341	0.000216476	1
cg07495314	0.92835	0.892488	0.965652	0.000216573	1
cg23290456	0.981746	0.972209	0.991377	0.00021662	1
cg14725641	1.04814	1.02234	1.07458	0.000217181	1
cg13169491	1.00991	1.00465	1.01521	0.000217282	1
cg01273309	0.987243	0.980547	0.993984	0.000217381	1
cg03270995	0.956861	0.934755	0.97949	0.000217624	1
cg05983323	0.854391	0.786013	0.928718	0.000217737	1
cg04527057	0.878168	0.819724	0.940778	0.000217875	1
cg24941373	1.16339	1.0737	1.26058	0.000217974	1
cg27075187	1.03712	1.01727	1.05735	0.000218096	1
cg26944981	0.776639	0.679217	0.888033	0.000218698	1
cg07475692	0.922004	0.883146	0.962572	0.00021876	1
cg07906115	0.920424	0.880828	0.961799	0.000218941	1
cg18477674	1.00642	1.00301	1.00985	0.000219319	1
cg15213114	0.838497	0.763713	0.920603	0.00021936	1
cg04978583	0.973866	0.960283	0.98764	0.000219451	1
cg15527678	0.982997	0.974096	0.99198	0.000219916	1
cg23290343	0.9555	0.9327	0.978858	0.000220627	1
cg27150178	0.985798	0.978343	0.993309	0.000221439	1
cg05835241	0.991303	0.986718	0.995909	0.000221508	1
cg07562918	0.983923	0.975495	0.992424	0.000222038	1
cg19261597	0.980224	0.969886	0.990672	0.000222101	1
cg11153891	0.98547	0.977844	0.993157	0.000222232	1
cg15654127	0.67267	0.544988	0.830265	0.000222512	1
cg24040570	0.868529	0.805904	0.936021	0.000222857	1
cg26190885	0.962267	0.942815	0.98212	0.00022297	1
cg04192580	0.978844	0.967793	0.99002	0.00022306	1
cg03333116	0.964356	0.945947	0.983122	0.000223413	1
cg08161617	0.870992	0.809395	0.937278	0.000223456	1
cg04213775	0.974511	0.96124	0.987965	0.000223652	1
cg09589565	0.989194	0.983502	0.994919	0.000224238	1
cg09352107	0.961508	0.941668	0.981767	0.000224458	1
cg27181253	0.990917	0.986123	0.995734	0.000226063	1
cg14231845	0.99122	0.986585	0.995877	0.000226198	1
cg26334954	0.651247	0.518497	0.817986	0.000226563	1
cg26430465	0.896967	0.846595	0.950337	0.000226589	1
cg22138278	0.931762	0.8974	0.96744	0.000227306	1
cg03067599	0.859017	0.792336	0.931309	0.00022768	1
cg18760094	0.929086	0.893451	0.966142	0.000227704	1
cg05558390	0.987636	0.981124	0.994191	0.000227708	1
cg04843067	0.989803	0.984422	0.995212	0.000228141	1
cg14849479	0.97874	0.967616	0.989992	0.000229083	1
cg11718677	0.963971	0.945337	0.982972	0.000229207	1
cg18837178	0.991256	0.986635	0.995898	0.000229397	1
cg01997878	0.975527	0.96275	0.988473	0.00023005	1
cg08262584	0.93499	0.902135	0.969041	0.000230429	1
cg09226684	0.97913	0.968201	0.990182	0.000230676	1
cg02254798	0.835955	0.759919	0.919598	0.00023081	1
cg23000811	0.865117	0.800909	0.934473	0.00023105	1
cg24539923	0.952614	0.928313	0.977551	0.000231342	1
cg04190760	0.980419	0.970151	0.990796	0.000232131	1
cg23492327	0.980833	0.970778	0.990993	0.000232469	1
cg05909891	0.992637	0.988738	0.996551	0.000232627	1
cg11953541	0.903677	0.856229	0.953755	0.000232683	1
cg24913115	0.744509	0.636265	0.871168	0.000232748	1
cg24598973	0.987858	0.981453	0.994306	0.000233074	1
cg05638174	1.01642	1.00764	1.02528	0.000233183	1
cg21041181	0.959126	0.938043	0.980683	0.000233255	1
cg12545295	0.911985	0.868304	0.957862	0.000234036	1
cg04637204	1.02526	1.01172	1.03899	0.00023515	1
cg01447254	0.983914	0.975447	0.992454	0.000235295	1
cg02242894	0.967068	0.949962	0.984481	0.000235339	1
cg19494587	0.97979	0.969186	0.99051	0.00023549	1
cg24588162	0.988811	0.982898	0.994759	0.000235731	1
cg22192692	0.87282	0.811778	0.938451	0.000235746	1
cg07166601	0.978692	0.96752	0.989992	0.000235863	1
cg22783308	0.915144	0.872891	0.959442	0.000236307	1
cg19295951	1.01092	1.00508	1.01679	0.000236335	1
cg21074092	0.957998	0.93633	0.980168	0.000236857	1
cg09403274	0.685097	0.559984	0.838163	0.000237039	1
cg00844589	0.779647	0.68274	0.89031	0.000237253	1
cg19702785	0.990993	0.986222	0.995787	0.000238133	1
cg24371534	0.979256	0.968368	0.990267	0.000238288	1
cg01148728	0.903058	0.855249	0.953539	0.000238559	1
cg26555023	0.927477	0.890961	0.96549	0.000239109	1
cg18387671	0.807411	0.720299	0.905058	0.00024014	1
cg19695867	0.967494	0.950578	0.984711	0.000240673	1
cg10503563	0.812241	0.726901	0.9076	0.000240872	1
cg14372486	1.01024	1.00476	1.01575	0.00024171	1
cg03930485	0.954619	0.931238	0.978588	0.00024189	1
cg13419986	0.989341	0.983695	0.995019	0.00024234	1
cg12875039	0.986363	0.979156	0.993623	0.000242854	1
cg12746356	1.01219	1.00566	1.01876	0.000242934	1
cg00786658	0.986448	0.979284	0.993664	0.000243154	1
cg14465910	0.848401	0.777071	0.92628	0.000243511	1
cg24411312	0.983388	0.974627	0.992228	0.000243575	1
cg23516949	0.985807	0.978307	0.993364	0.000243642	1
cg21490485	0.964129	0.945497	0.983129	0.000243661	1
cg11068520	0.629919	0.492105	0.80633	0.000243714	1
cg12358000	1.02662	1.01231	1.04114	0.000243976	1
cg22866015	1.0251	1.01161	1.03878	0.000244383	1
cg27266479	0.975969	0.963365	0.988738	0.000244592	1
cg25921418	0.944368	0.915917	0.973702	0.000244957	1
cg01294028	0.963056	0.943875	0.982627	0.000245021	1
cg18237277	0.904526	0.857295	0.95436	0.000245187	1
cg14162842	0.966933	0.94971	0.984467	0.000245222	1
cg01936347	0.981595	0.971894	0.991393	0.000246515	1
cg00444261	1.05556	1.02548	1.08652	0.000246542	1
cg12948920	0.988219	0.981978	0.994501	0.000246645	1
cg11833293	0.982498	0.973265	0.99182	0.000247362	1
cg01881828	0.985403	0.977683	0.993183	0.000247792	1
cg27018904	0.974989	0.961869	0.988288	0.000248086	1
cg04824390	0.688017	0.563281	0.840376	0.000248402	1
cg16955407	1.01079	1.005	1.01662	0.000249069	1
cg06983586	0.871098	0.809088	0.937861	0.00024963	1
cg21045711	1.02494	1.01151	1.03853	0.000250066	1
cg15786971	0.923865	0.885528	0.963862	0.000250139	1
cg24157652	0.894111	0.842108	0.949324	0.000251214	1
cg05532669	0.855891	0.787475	0.930251	0.000251333	1
cg27554769	0.915333	0.872987	0.959732	0.000251565	1
cg17759093	0.86341	0.798108	0.934056	0.000252151	1
cg07770049	0.98332	0.974503	0.992218	0.000252285	1
cg10283707	0.81556	0.731181	0.909675	0.00025331	1
cg09395718	0.977385	0.965482	0.989435	0.000253316	1
cg10122766	0.83817	0.76254	0.921301	0.000253366	1
cg26395193	0.984752	0.976679	0.992891	0.000253431	1
cg08444830	0.860587	0.794076	0.932669	0.000253751	1
cg11352847	1.00999	1.00463	1.01538	0.000254255	1
cg09252805	0.903142	0.855163	0.953812	0.000254344	1
cg19527121	0.877098	0.817579	0.940951	0.000254634	1
cg19551767	1.08087	1.03675	1.12687	0.000254841	1
cg08062023	0.972357	0.957859	0.987074	0.000254858	1
cg03319497	0.991239	0.986574	0.995925	0.000255161	1
cg02121892	0.971668	0.956815	0.986752	0.000255408	1
cg07126281	0.95859	0.937105	0.980569	0.000255671	1
cg01001533	0.987577	0.980981	0.994217	0.000255796	1
cg00940313	0.796129	0.704539	0.899625	0.000255898	1
cg20909078	0.902907	0.8548	0.953721	0.000256019	1
cg14579560	0.96357	0.944583	0.982938	0.000257375	1
cg26169138	0.960393	0.939798	0.981439	0.000258293	1
cg20335959	0.933346	0.899442	0.968527	0.000258321	1
cg13892980	1.0805	1.03654	1.12633	0.000258605	1
cg02484047	0.866723	0.802706	0.935847	0.000258641	1
cg01994779	0.982802	0.973695	0.991993	0.000259626	1
cg19742789	1.06341	1.0289	1.09908	0.00026005	1
cg23821003	0.98494	0.976952	0.992994	0.000260204	1
cg04524652	0.838555	0.762942	0.921662	0.000260269	1
cg24319613	0.906477	0.859939	0.955533	0.000260719	1
cg18790382	1.00948	1.00438	1.0146	0.000261094	1
cg13685727	1.01681	1.00775	1.02595	0.000261566	1
cg10059536	1.01904	1.00877	1.02941	0.000261885	1
cg03742214	1.05942	1.02709	1.09278	0.000262123	1
cg27254468	0.973421	0.959439	0.987607	0.000262896	1
cg14071922	0.86474	0.799813	0.934938	0.000262925	1
cg07679836	0.989364	0.983698	0.995062	0.00026304	1
cg13757735	0.984964	0.976981	0.993012	0.000263189	1
cg05639205	0.99283	0.988999	0.996675	0.000263528	1
cg02538342	0.823667	0.742152	0.914134	0.000263812	1
cg13995006	0.981237	0.971303	0.991272	0.00026384	1
cg00442931	0.984641	0.976488	0.992863	0.000264151	1
cg25005433	0.900565	0.851291	0.95269	0.000264151	1
cg24937269	0.909611	0.864468	0.957112	0.000264547	1
cg16377998	0.97008	0.954375	0.986044	0.000264627	1
cg27579984	0.796796	0.705241	0.900237	0.000264741	1
cg18712973	0.980632	0.970377	0.990996	0.000266223	1
cg12094174	0.980736	0.970534	0.991045	0.000266406	1
cg07249433	1.0094	1.00433	1.01448	0.000266551	1
cg14157042	0.898656	0.848484	0.951795	0.000266846	1
cg17872999	0.868825	0.805557	0.937062	0.000267299	1
cg14040532	1.03525	1.01614	1.05471	0.000267995	1
cg06398908	0.943867	0.91499	0.973656	0.000268518	1
cg19009323	0.951867	0.926942	0.977462	0.000268675	1
cg22853427	1.01239	1.00571	1.01912	0.000268816	1
cg05844625	0.9871	0.980229	0.994019	0.00026898	1
cg11424525	0.910322	0.865453	0.957517	0.000269164	1
cg20517154	1.05161	1.02352	1.08047	0.00027001	1
cg04012817	0.942151	0.91242	0.97285	0.000270069	1
cg25568716	0.885005	0.8287	0.945136	0.000270149	1
cg06659580	1.07594	1.03437	1.11917	0.000271249	1
cg00206063	1.00686	1.00316	1.01057	0.000271411	1
cg15829622	0.981513	0.971702	0.991422	0.000271651	1
cg16757605	0.877492	0.817875	0.941455	0.000272063	1
cg24536250	0.986043	0.978609	0.993533	0.000272329	1
cg02100305	0.938193	0.906512	0.97098	0.000272393	1
cg09795087	0.987891	0.981431	0.994393	0.000272854	1
cg06471905	0.980877	0.970729	0.991131	0.000273689	1
cg09380067	0.985711	0.978099	0.993381	0.000273689	1
cg00553880	0.899443	0.849537	0.95228	0.000273919	1
cg14189988	0.980055	0.969476	0.990748	0.000274115	1
cg17006443	0.973902	0.960127	0.987874	0.000274172	1
cg23839074	0.992187	0.988003	0.996389	0.000274906	1
cg04911940	0.887187	0.831769	0.946297	0.000275556	1
cg12485794	0.976799	0.96452	0.989233	0.000275657	1
cg00093544	1.01198	1.00551	1.01849	0.000275739	1
cg20224517	0.908935	0.863344	0.956933	0.000276243	1
cg21623722	0.984981	0.976981	0.993048	0.000276317	1
cg09152047	1.01587	1.00729	1.02453	0.000276351	1
cg25937028	0.800083	0.709455	0.902287	0.000276559	1
cg24071064	0.984766	0.976651	0.992949	0.000276805	1
cg06384055	0.876363	0.81618	0.940983	0.000277166	1
cg00391668	0.98892	0.982997	0.994878	0.000277213	1
cg11520509	0.983959	0.975418	0.992574	0.000277236	1
cg10767909	0.821555	0.738954	0.913388	0.000277268	1
cg15549926	0.918255	0.876994	0.961457	0.000277354	1
cg16530077	0.714296	0.59579	0.856372	0.000277814	1
cg20330922	0.97872	0.967435	0.990137	0.000277877	1
cg15054197	0.923801	0.885148	0.964142	0.000278582	1
cg20027742	0.981274	0.971322	0.991329	0.000278597	1
cg02262585	0.984872	0.976808	0.993003	0.000279138	1
cg19584957	0.977875	0.966144	0.989748	0.000279598	1
cg10501008	0.95412	0.930248	0.978605	0.000280262	1
cg03555487	0.982103	0.972581	0.991719	0.000280484	1
cg18474934	0.991396	0.986785	0.996029	0.000280495	1
cg14013597	0.989666	0.984135	0.995229	0.000280572	1
cg19436502	0.783231	0.686476	0.893623	0.000281479	1
cg12743165	0.982808	0.973652	0.992049	0.000281547	1
cg04580170	0.98177	0.972069	0.991568	0.000282128	1
cg01871963	0.977381	0.965384	0.989526	0.000282413	1
cg00788012	0.971458	0.956389	0.986764	0.000282942	1
cg07688490	1.0121	1.00555	1.0187	0.000283298	1
cg26628634	0.944477	0.915792	0.974061	0.000283381	1
cg09189890	0.805798	0.717118	0.905446	0.000283768	1
cg15050577	0.978326	0.966818	0.989971	0.000284021	1
cg25643782	0.834355	0.756611	0.920087	0.000284614	1
cg10195567	1.1425	1.06318	1.22773	0.000284688	1
cg08754967	1.02046	1.00935	1.03168	0.000285548	1
cg05915622	0.951819	0.926761	0.977554	0.000285932	1
cg07918458	0.785945	0.69004	0.895179	0.000285998	1
cg20588703	0.973974	0.960195	0.987951	0.000286286	1
cg27247225	0.990082	0.984764	0.995429	0.000286291	1
cg27267617	0.98674	0.979649	0.993883	0.000286467	1
cg02107879	0.985961	0.978456	0.993523	0.000286935	1
cg00008971	1.01062	1.00487	1.01641	0.000287856	1
cg01715370	0.98826	0.981969	0.994591	0.00028913	1
cg02921269	0.92691	0.889639	0.965742	0.000289287	1
cg04003615	0.985936	0.978414	0.993516	0.000289336	1
cg26893445	0.773958	0.673815	0.888984	0.00028953	1
cg21635917	1.01118	1.00512	1.01727	0.000289874	1
cg17920479	0.991742	0.987303	0.9962	0.000290289	1
cg06716613	0.835955	0.758734	0.921036	0.000290864	1
cg20274006	0.987445	0.980718	0.994218	0.000291736	1
cg15168294	0.984183	0.975729	0.99271	0.000291949	1
cg27495903	1.02263	1.01032	1.03509	0.000292726	1
cg01101527	0.983831	0.975189	0.99255	0.000293204	1
cg18256429	0.966842	0.949356	0.984651	0.00029346	1
cg07357300	1.03124	1.0142	1.04856	0.000295581	1
cg11008718	0.84277	0.768196	0.924582	0.000295968	1
cg14913969	1.02031	1.00926	1.03148	0.000296227	1
cg25031787	0.982997	0.973908	0.992171	0.000296493	1
cg10417218	0.98542	0.977611	0.993291	0.000296693	1
cg16824731	0.776163	0.676607	0.890367	0.000296947	1
cg07177569	0.872069	0.809735	0.939203	0.000297324	1
cg26568226	0.986655	0.979499	0.993863	0.000297649	1
cg03257200	0.730659	0.616396	0.866103	0.000298333	1
cg04777052	0.83223	0.753394	0.919316	0.000298336	1
cg00215432	1.01235	1.00564	1.0191	0.000298941	1
cg17767319	0.975042	0.961776	0.988491	0.000299068	1
cg23960324	1.01894	1.00863	1.02935	0.000299833	1
cg14810385	0.988453	0.982249	0.994697	0.00030017	1
cg18844304	0.944372	0.915519	0.974136	0.000300171	1
cg22317104	1.03357	1.01523	1.05225	0.000300635	1
cg09548950	0.87971	0.820652	0.943017	0.000300677	1
cg22903655	0.956856	0.934244	0.980015	0.000301007	1
cg11131811	0.889644	0.834982	0.947885	0.000301203	1
cg05289892	1.01024	1.00467	1.01584	0.00030146	1
cg09393362	0.929758	0.893749	0.967217	0.000301574	1
cg00762662	0.971762	0.95678	0.98698	0.000302544	1
cg13901857	0.963609	0.944422	0.983185	0.0003032	1
cg17806623	0.990871	0.985953	0.995814	0.0003032	1
cg23431730	0.876637	0.816199	0.94155	0.000303303	1
cg05882415	0.913197	0.869296	0.959315	0.000303456	1
cg09801607	0.990548	0.985457	0.995665	0.000303576	1
cg04385753	0.775103	0.675031	0.890011	0.000303815	1
cg13809864	0.841334	0.766039	0.92403	0.00030421	1
cg03285963	0.804036	0.714274	0.905077	0.000304681	1
cg07944707	0.982326	0.972864	0.99188	0.000304989	1
cg17002259	0.807923	0.719596	0.907092	0.000305359	1
cg10573143	0.988914	0.982948	0.994917	0.000305419	1
cg10767168	0.833041	0.754392	0.919891	0.000305955	1
cg21350115	0.991944	0.987597	0.996309	0.000305966	1
cg05269845	1.00936	1.00427	1.01447	0.000306087	1
cg22354724	0.98672	0.979585	0.993908	0.000306206	1
cg24923509	0.991352	0.986687	0.996038	0.000306611	1
cg14141458	0.986737	0.979608	0.993917	0.000307131	1
cg03727373	0.95367	0.929416	0.978558	0.000307328	1
cg04233664	1.07948	1.03556	1.12525	0.000307343	1
cg19213955	1.05906	1.02656	1.09259	0.000307598	1
cg19320505	0.975791	0.962886	0.988869	0.000308821	1
cg13255056	0.888528	0.833266	0.947454	0.00030917	1
cg20411813	0.984125	0.975605	0.99272	0.000309887	1
cg13979182	0.941439	0.911064	0.972826	0.000310432	1
cg14840416	0.943489	0.914126	0.973795	0.00031079	1
cg03083632	0.838435	0.761857	0.92271	0.00031086	1
cg04865506	0.989141	0.983288	0.99503	0.000311649	1
cg22143809	0.98304	0.973942	0.992224	0.000311762	1
cg22236894	0.915671	0.87285	0.960594	0.000311885	1
cg24960763	0.925993	0.888081	0.965524	0.000312329	1
cg07342790	0.971999	0.957106	0.987125	0.000312381	1
cg10718721	0.969081	0.952672	0.985772	0.000312663	1
cg23922867	0.92142	0.881315	0.963349	0.00031268	1
cg26868250	0.989036	0.983125	0.994983	0.000312876	1
cg20260663	1.08479	1.03783	1.13388	0.000312884	1
cg01005536	0.972416	0.957736	0.98732	0.000313061	1
cg08267701	0.861136	0.793898	0.93407	0.000313063	1
cg07557792	0.973763	0.959784	0.987945	0.000313477	1
cg22891278	0.96601	0.948012	0.98435	0.000313613	1
cg06526960	0.962537	0.942755	0.982735	0.000313808	1
cg05164570	0.845416	0.771609	0.926282	0.000314635	1
cg06025835	0.98297	0.973827	0.992198	0.000314696	1
cg18771937	0.992313	0.988156	0.996487	0.000314726	1
cg05741182	0.777321	0.677769	0.891495	0.000315089	1
cg20912439	0.939724	0.908471	0.972052	0.000315162	1
cg21942572	0.987669	0.981025	0.994359	0.000315169	1
cg25985103	0.9771	0.964861	0.989494	0.000315495	1
cg25227335	0.971524	0.956372	0.986916	0.000315506	1
cg10578387	1.01066	1.00485	1.01651	0.000315511	1
cg07507685	1.01647	1.00747	1.02554	0.000315693	1
cg02023167	1.00913	1.00415	1.01413	0.000316437	1
cg19625388	0.968489	0.951759	0.985514	0.000316704	1
cg14816748	0.908998	0.862997	0.957451	0.000317021	1
cg27416261	0.991271	0.986551	0.996014	0.000318258	1
cg03234775	0.927809	0.890713	0.96645	0.000319259	1
cg26831227	0.804409	0.714483	0.905653	0.000320212	1
cg17583844	1.01115	1.00506	1.01728	0.000321338	1
cg27570596	0.91307	0.868927	0.959455	0.00032187	1
cg02773639	0.986799	0.979679	0.993971	0.0003222	1
cg13369332	0.949942	0.923727	0.976902	0.000322303	1
cg22992472	0.808444	0.719981	0.907776	0.000322655	1
cg16626480	0.987252	0.980371	0.994181	0.000323939	1
cg07723431	0.97814	0.966426	0.989997	0.000323977	1
cg25461267	0.894139	0.841228	0.950378	0.000324031	1
cg21212494	0.827758	0.7467	0.917615	0.000324279	1
cg13894163	0.907935	0.861365	0.957023	0.000324286	1
cg06274117	0.964702	0.945985	0.98379	0.000324627	1
cg25983317	0.959926	0.938757	0.981573	0.000324883	1
cg08996502	0.900695	0.850764	0.953556	0.00032525	1
cg19463471	0.986435	0.979115	0.993809	0.000325521	1
cg08769276	0.82611	0.74438	0.916814	0.000325669	1
cg12550731	0.986846	0.979744	0.993998	0.000325936	1
cg11719049	0.990804	0.985824	0.99581	0.000326899	1
cg01073178	0.980832	0.970529	0.991244	0.000327694	1
cg22361181	0.98469	0.976436	0.993014	0.000327968	1
cg25563233	1.07613	1.0339	1.12009	0.000328039	1
cg18756579	0.943602	0.914181	0.973971	0.00032835	1
cg04562562	0.937575	0.90517	0.97114	0.000328419	1
cg17472832	0.986567	0.979312	0.993876	0.000329293	1
cg22795185	0.924296	0.885422	0.964877	0.000329533	1
cg13969321	0.87271	0.810206	0.940036	0.000329619	1
cg03346410	0.908852	0.862654	0.957523	0.000329795	1
cg02291224	0.910723	0.865399	0.958421	0.000330053	1
cg19631648	0.987696	0.981044	0.994394	0.000330219	1
cg07961479	0.986079	0.978561	0.993655	0.000330746	1
cg24258125	0.981973	0.972266	0.991776	0.000331576	1
cg26686647	0.986546	0.979275	0.99387	0.000331781	1
cg17511416	0.957818	0.935539	0.980628	0.00033184	1
cg25638714	0.985933	0.978334	0.993592	0.000332663	1
cg10681725	0.968706	0.95203	0.985675	0.000332669	1
cg05324732	0.73312	0.618756	0.868621	0.000333617	1
cg18087326	0.990274	0.985001	0.995576	0.000333986	1
cg08747970	0.977997	0.966181	0.989958	0.00033401	1
cg13556663	0.980235	0.969602	0.990985	0.000334063	1
cg05106206	0.939125	0.907442	0.971914	0.000334579	1
cg09368670	0.705783	0.583422	0.853808	0.000334603	1
cg08867249	0.930922	0.895212	0.968056	0.000334808	1
cg11371493	0.915796	0.872818	0.960891	0.000334928	1
cg23699933	0.940841	0.910005	0.972723	0.00033512	1
cg12260192	0.983051	0.97391	0.992277	0.000335145	1
cg00783759	0.839187	0.762515	0.923568	0.000335192	1
cg19878884	0.984614	0.976305	0.992994	0.000335772	1
cg17457637	0.992	0.987655	0.996365	0.000335862	1
cg05465347	0.989101	0.983194	0.995043	0.000335871	1
cg03079395	0.993923	0.990618	0.99724	0.000335935	1
cg08244181	0.976392	0.963725	0.989226	0.00033598	1
cg27649037	0.985659	0.977907	0.993473	0.000336447	1
cg21248188	1.00928	1.0042	1.01439	0.000336851	1
cg05379509	0.984209	0.975681	0.992811	0.000336984	1
cg17417191	0.815708	0.729741	0.911803	0.000337166	1
cg04686790	0.780732	0.681906	0.893881	0.000337631	1
cg20441553	0.985706	0.977976	0.993496	0.000337771	1
cg07779120	1.00674	1.00305	1.01045	0.000337959	1
cg18030587	0.987183	0.980244	0.994171	0.000338052	1
cg05771369	1.00675	1.00305	1.01047	0.000338587	1
cg27100316	0.754668	0.646992	0.880264	0.000338787	1
cg26801646	0.919043	0.87757	0.962475	0.000339175	1
cg23318560	0.917374	0.875103	0.961687	0.000339576	1
cg12835845	1.0504	1.02252	1.07904	0.000339845	1
cg01216415	0.795381	0.70175	0.901504	0.00034014	1
cg20132791	1.01008	1.00455	1.01564	0.000340404	1
cg15154002	0.975764	0.962754	0.98895	0.000340461	1
cg06017697	0.986384	0.979013	0.993811	0.000340663	1
cg00639517	1.0174	1.00784	1.02705	0.000340763	1
cg00785042	0.980792	0.970436	0.991258	0.000341996	1
cg20091114	0.953848	0.929497	0.978836	0.000342028	1
cg03221702	0.987388	0.980552	0.994272	0.000343005	1
cg22121237	0.970011	0.953976	0.986316	0.000343502	1
cg11277148	1.06324	1.02814	1.09954	0.000343709	1
cg08868930	0.741568	0.629591	0.873461	0.000343818	1
cg19511844	0.978085	0.96629	0.990023	0.000343829	1
cg02899903	0.991481	0.986848	0.996137	0.00034421	1
cg04108502	0.948519	0.921461	0.976372	0.00034452	1
cg00019301	0.895639	0.843183	0.951359	0.00034457	1
cg12760479	0.977019	0.964658	0.98954	0.000345475	1
cg25581063	0.877901	0.817464	0.942806	0.000345843	1
cg02683363	0.899253	0.848419	0.953133	0.000347933	1
cg07229076	1.03209	1.01438	1.05012	0.000348134	1
cg03915298	0.863449	0.796696	0.935794	0.000348331	1
cg00017475	0.941764	0.9113	0.973246	0.000348365	1
cg01579086	0.978374	0.96672	0.990169	0.000349013	1
cg05142982	1.00887	1.004	1.01376	0.000349806	1
cg19350682	1.05076	1.02262	1.07967	0.000349815	1
cg04667246	0.696295	0.570959	0.849144	0.000350275	1
cg18115627	1.01227	1.00552	1.01906	0.000351335	1
cg15576342	0.987296	0.980397	0.994243	0.000351973	1
cg19590674	0.9556	0.932091	0.979701	0.000352055	1
cg13180038	0.901516	0.851683	0.954265	0.000352177	1
cg16490209	1.00812	1.00366	1.01261	0.000353382	1
cg00188298	0.953778	0.929334	0.978865	0.000353527	1
cg21210537	0.977677	0.965642	0.989862	0.000353751	1
cg19126910	0.991828	0.987373	0.996303	0.000353752	1
cg16443926	0.974697	0.961086	0.9885	0.000354106	1
cg19208681	0.991988	0.987619	0.996377	0.000354593	1
cg03418137	0.958524	0.936498	0.981067	0.000354958	1
cg23250262	1.00955	1.0043	1.01483	0.000355211	1
cg25442239	1.05854	1.026	1.09212	0.000355351	1
cg21188772	1.05628	1.02501	1.08851	0.000355924	1
cg06378976	0.980947	0.970643	0.99136	0.000356033	1
cg15598662	1.03508	1.01567	1.05485	0.000356102	1
cg01091143	0.987947	0.981393	0.994545	0.000356212	1
cg23970523	0.985217	0.977195	0.993305	0.000356314	1
cg21968169	0.972038	0.957022	0.987291	0.00035675	1
cg13986536	1.0325	1.01453	1.05079	0.000356838	1
cg24044479	0.882985	0.824671	0.945423	0.000357111	1
cg07084627	1.00716	1.00322	1.01112	0.000357146	1
cg10836034	0.805906	0.71586	0.907278	0.000357465	1
cg16370856	0.961013	0.940254	0.982231	0.000358233	1
cg15639721	0.875712	0.814156	0.941922	0.000358455	1
cg06889547	0.984181	0.9756	0.992838	0.00035869	1
cg07773769	0.985745	0.978002	0.993549	0.000359076	1
cg21467717	0.973418	0.959118	0.987931	0.000359722	1
cg20718570	0.969227	0.952727	0.986012	0.000359882	1
cg00055052	0.982953	0.973712	0.992281	0.000360009	1
cg09050461	0.986888	0.979758	0.99407	0.000360041	1
cg17324776	0.812043	0.724279	0.910442	0.000360072	1
cg08702805	0.982907	0.973641	0.992261	0.000360191	1
cg17675724	1.01144	1.00514	1.01779	0.000360374	1
cg18268631	0.977359	0.965138	0.989734	0.000360476	1
cg14052511	0.992013	0.987652	0.996393	0.000360496	1
cg07191348	0.984814	0.976568	0.993128	0.000360565	1
cg25743221	0.991104	0.98625	0.995982	0.000361117	1
cg10301967	0.760296	0.654007	0.883859	0.00036137	1
cg07318453	0.96068	0.939736	0.982091	0.000361372	1
cg04188362	0.920269	0.879192	0.963264	0.000361798	1
cg22317537	0.945973	0.917535	0.975292	0.000361826	1
cg18718657	0.980912	0.970577	0.991356	0.000361859	1
cg26507353	1.00769	1.00345	1.01194	0.00036295	1
cg13673779	0.908931	0.862453	0.957914	0.000363119	1
cg10142874	1.01911	1.00856	1.02976	0.000363368	1
cg06859970	0.98319	0.97407	0.992396	0.000363745	1
cg09033691	0.966538	0.94862	0.984794	0.00036393	1
cg05487736	0.881983	0.823141	0.945032	0.00036407	1
cg00533496	0.974658	0.961	0.988511	0.000364194	1
cg00545295	0.986188	0.978676	0.993759	0.000364296	1
cg17933787	1.02082	1.00932	1.03245	0.000364438	1
cg26500588	0.985805	0.978086	0.993586	0.000364856	1
cg01898661	1.01086	1.00487	1.01688	0.000365758	1
cg12464820	0.97812	0.966288	0.990097	0.000367012	1
cg14968603	0.922328	0.8822	0.964282	0.000367271	1
cg05674199	0.98008	0.96929	0.99099	0.000367392	1
cg19660878	0.808632	0.719446	0.908874	0.000367398	1
cg17968668	0.986327	0.978884	0.993826	0.000367476	1
cg00082874	0.974949	0.961432	0.988655	0.000368364	1
cg09743596	0.988742	0.982601	0.994921	0.000368507	1
cg27425612	1.07268	1.03205	1.1149	0.000368557	1
cg14127336	0.989957	0.984473	0.995471	0.000368793	1
cg05695937	1.01113	1.00499	1.01731	0.000369307	1
cg27480377	0.932479	0.897282	0.969057	0.000369333	1
cg14951038	0.948394	0.921133	0.976462	0.000369886	1
cg11921473	0.920281	0.879144	0.963343	0.000370033	1
cg06434311	0.984027	0.975343	0.992788	0.000370122	1
cg23344580	0.950012	0.923569	0.977213	0.000370295	1
cg16061375	0.660552	0.525731	0.829947	0.000370479	1
cg23237634	0.793999	0.699304	0.901517	0.000370836	1
cg03912614	0.974696	0.961038	0.988548	0.000371293	1
cg14771810	1.05189	1.02299	1.08161	0.000371485	1
cg24668990	0.990955	0.98601	0.995925	0.000371549	1
cg12688248	0.949395	0.922632	0.976934	0.000371593	1
cg22326681	0.980282	0.969591	0.991091	0.000371649	1
cg26495591	0.964197	0.945031	0.983752	0.000372173	1
cg06245997	0.908652	0.861959	0.957875	0.000372393	1
cg27061366	0.967446	0.949972	0.985241	0.000372414	1
cg02172819	0.990018	0.984561	0.995504	0.000373657	1
cg01428361	0.880662	0.821116	0.944526	0.000374026	1
cg02935627	1.01508	1.00674	1.02348	0.00037405	1
cg03252718	0.977841	0.965844	0.989987	0.000374157	1
cg02889777	0.881871	0.822863	0.945111	0.000374267	1
cg13983319	1.01276	1.00571	1.01986	0.000374424	1
cg18576686	0.979347	0.968148	0.990674	0.000375449	1
cg03951424	1.04305	1.0191	1.06757	0.000375692	1
cg24860716	0.975161	0.961736	0.988773	0.000376238	1
cg07541020	1.01032	1.00462	1.01605	0.000376327	1
cg13888445	0.98534	0.977352	0.993393	0.000376395	1
cg16403307	0.915501	0.872021	0.961149	0.000376439	1
cg23542308	0.858293	0.788965	0.933713	0.00037649	1
cg04606367	1.01167	1.00522	1.01816	0.000376681	1
cg08708553	0.984571	0.976168	0.993046	0.000377188	1
cg11227541	0.968182	0.951077	0.985594	0.000377212	1
cg24475744	0.714416	0.593528	0.859926	0.000377312	1
cg00794722	0.979271	0.968029	0.990645	0.000377539	1
cg02847140	1.04213	1.01869	1.06612	0.000377544	1
cg27491759	1.02695	1.012	1.04212	0.000377741	1
cg17917683	0.886803	0.829968	0.947529	0.000378192	1
cg00204782	0.99389	0.990537	0.997254	0.000378517	1
cg01574673	0.992303	0.988084	0.99654	0.000378708	1
cg06059056	1.02721	1.01211	1.04253	0.000378801	1
cg15264303	0.976455	0.963709	0.989369	0.000378886	1
cg17085238	0.923112	0.883273	0.964748	0.000378895	1
cg07805952	0.978735	0.967204	0.990405	0.000378985	1
cg09825030	0.983817	0.975004	0.992708	0.000379096	1
cg02250501	0.928799	0.891727	0.967412	0.000379183	1
cg24844449	0.987681	0.980952	0.994456	0.000379798	1
cg00939684	0.98547	0.977547	0.993458	0.000380086	1
cg24896697	0.863001	0.795642	0.936062	0.000380141	1
cg08696890	0.97345	0.959109	0.988006	0.000380435	1
cg14393411	0.852982	0.781353	0.931178	0.000380435	1
cg15104484	0.667964	0.534667	0.834494	0.000380729	1
cg08710432	0.98298	0.973716	0.992333	0.000380792	1
cg00348858	0.961632	0.941099	0.982612	0.00038107	1
cg00111335	1.01695	1.00756	1.02642	0.000381082	1
cg07063325	0.958285	0.93602	0.981078	0.000381284	1
cg10319505	1.03256	1.01447	1.05098	0.000381313	1
cg19028804	0.885066	0.827412	0.946736	0.000381413	1
cg05918682	0.91368	0.869285	0.960342	0.000381905	1
cg23199053	0.86981	0.805378	0.939398	0.000382316	1
cg26337624	0.978508	0.966847	0.99031	0.00038241	1
cg25806492	0.839479	0.762215	0.924575	0.000382498	1
cg06270799	1.01708	1.00762	1.02662	0.000383329	1
cg18751958	0.960199	0.938914	0.981966	0.000383483	1
cg17020895	0.98617	0.978619	0.993779	0.000383664	1
cg05858126	0.992728	0.988737	0.996736	0.000384165	1
cg01663570	0.932937	0.897865	0.96938	0.000384239	1
cg22671342	1.00837	1.00374	1.01301	0.000384695	1
cg08379726	0.837187	0.758954	0.923484	0.000384878	1
cg17052976	0.919041	0.87719	0.96289	0.000384902	1
cg20720680	0.976098	0.963146	0.989225	0.000385995	1
cg08454053	1.01278	1.0057	1.0199	0.000386273	1
cg19365615	0.908545	0.861674	0.957964	0.000386569	1
cg26215437	0.766887	0.662316	0.887968	0.000387337	1
cg03063057	0.975407	0.962084	0.988915	0.000387343	1
cg13782884	1.01697	1.00756	1.02647	0.000388527	1
cg08140542	0.978344	0.966581	0.99025	0.000388946	1
cg22224597	0.992797	0.988839	0.99677	0.000388954	1
cg05387146	1.03937	1.01743	1.06179	0.000389034	1
cg08938475	0.955538	0.931825	0.979853	0.000389083	1
cg16590991	0.970462	0.954516	0.986674	0.000389506	1
cg11467291	0.985916	0.978218	0.993675	0.00039033	1
cg21930487	0.756973	0.649014	0.882892	0.000390469	1
cg14310958	0.983661	0.974745	0.992659	0.000391182	1
cg23063506	0.844401	0.769039	0.927148	0.000391409	1
cg09935766	0.945615	0.916833	0.975301	0.000391497	1
cg03969079	0.990471	0.985242	0.995727	0.000391565	1
cg13968953	0.893506	0.839585	0.950891	0.000391831	1
cg12806521	0.960896	0.93994	0.98232	0.000391905	1
cg19487745	0.984338	0.975785	0.992966	0.000391988	1
cg23326224	0.984492	0.976022	0.993035	0.000392001	1
cg15829006	0.981408	0.971279	0.991643	0.000392144	1
cg27483317	0.983312	0.974205	0.992505	0.000393094	1
cg09506183	0.705753	0.582056	0.855738	0.000393307	1
cg01976176	0.877943	0.816969	0.943467	0.000393308	1
cg25669249	0.985389	0.977402	0.993442	0.000393356	1
cg03657573	1.05688	1.02504	1.08971	0.000393919	1
cg03348474	0.861715	0.79362	0.935653	0.000394808	1
cg18107425	0.991457	0.986763	0.996174	0.000395092	1
cg24108746	0.983896	0.975099	0.992772	0.000395479	1
cg03463818	0.992526	0.988415	0.996653	0.000395583	1
cg00718518	0.988611	0.982367	0.994896	0.000395743	1
cg17524624	0.97023	0.954142	0.986589	0.000396231	1
cg24039149	0.988353	0.981967	0.99478	0.000396354	1
cg08738722	0.988059	0.981513	0.994649	0.000396903	1
cg19933664	1.01754	1.0078	1.02738	0.000397046	1
cg21160192	0.9645	0.9454	0.983986	0.000397295	1
cg04360557	0.875157	0.812886	0.942198	0.000398708	1
cg00699996	0.984401	0.975871	0.993006	0.000399082	1
cg11350833	0.980819	0.97036	0.991391	0.000399257	1
cg02030628	0.92166	0.880959	0.964241	0.000399873	1
cg20140034	0.990463	0.985222	0.995733	0.000400654	1
cg05944193	1.05029	1.02214	1.07921	0.000400656	1
cg26653293	0.785855	0.687676	0.89805	0.000401359	1
cg01852180	0.833099	0.75297	0.921754	0.000401523	1
cg06331715	1.05766	1.02533	1.09102	0.000401801	1
cg08321600	0.987468	0.980594	0.99439	0.000402246	1
cg03753849	0.919132	0.877182	0.963088	0.000403311	1
cg09401340	0.975792	0.962633	0.989131	0.000403682	1
cg08100565	0.862416	0.794515	0.93612	0.000403707	1
cg26960221	0.974738	0.961016	0.988656	0.000404501	1
cg17391087	1.01704	1.00756	1.02661	0.000404528	1
cg24292323	1.06548	1.02868	1.1036	0.000404883	1
cg18609891	0.989832	0.984242	0.995454	0.000405102	1
cg21596530	0.985929	0.978215	0.993702	0.000405457	1
cg12581035	0.908873	0.861994	0.958301	0.000405697	1
cg00049323	0.972353	0.95736	0.987582	0.000406207	1
cg16000544	0.978669	0.967042	0.990437	0.000406662	1
cg07867325	0.992277	0.988022	0.996551	0.000406714	1
cg08306084	0.985031	0.97683	0.993301	0.000406801	1
cg09857617	0.983351	0.974241	0.992547	0.000407453	1
cg13414834	0.982022	0.972194	0.99195	0.00040789	1
cg20639618	0.977941	0.965919	0.990113	0.000408635	1
cg14491820	1.00689	1.00306	1.01072	0.000408737	1
cg09432166	0.88138	0.821773	0.945309	0.000408989	1
cg20858173	0.976533	0.963757	0.989478	0.00040907	1
cg07593205	1.00991	1.0044	1.01545	0.000409143	1
cg14102807	0.989376	0.983532	0.995254	0.000409377	1
cg18499060	0.942385	0.911873	0.973918	0.000409718	1
cg13930468	0.928373	0.890881	0.967442	0.000409738	1
cg24155961	0.975337	0.96192	0.988941	0.000410067	1
cg25093583	0.9209	0.879749	0.963976	0.000410933	1
cg17368500	0.922732	0.882471	0.96483	0.000411029	1
cg17460846	0.805234	0.714049	0.908063	0.000411219	1
cg06159548	0.987405	0.980486	0.994373	0.000411454	1
cg10733978	0.969383	0.952802	0.986253	0.000411608	1
cg23046934	0.986146	0.978542	0.99381	0.000412397	1
cg05804220	1.0107	1.00475	1.01669	0.00041264	1
cg22379213	0.986223	0.978659	0.993845	0.000412991	1
cg09134969	0.974858	0.961176	0.988734	0.000413759	1
cg17788850	0.955513	0.931679	0.979957	0.000414128	1
cg08941759	0.681369	0.550671	0.843088	0.000414323	1
cg01986123	1.05214	1.02287	1.08225	0.000414694	1
cg11640591	0.988924	0.982828	0.995058	0.000414816	1
cg19073447	0.957869	0.93525	0.981034	0.000414883	1
cg09996777	0.98518	0.977047	0.993381	0.000415311	1
cg14267862	0.981417	0.97125	0.991691	0.000415313	1
cg10533536	0.963345	0.943578	0.983527	0.000415322	1
cg09301143	0.982764	0.973322	0.992296	0.000415327	1
cg08813936	0.976558	0.96378	0.989505	0.000415707	1
cg06568038	0.956925	0.933812	0.98061	0.000416107	1
cg03895392	0.988017	0.981425	0.994653	0.000416183	1
cg13400516	0.913411	0.868607	0.960527	0.000416594	1
cg19402238	0.978983	0.967503	0.9906	0.000416938	1
cg15685834	1.00887	1.00393	1.01383	0.000418057	1
cg14257814	0.966066	0.947716	0.984772	0.000418302	1
cg09355771	0.993222	0.989477	0.996982	0.000418985	1
cg18965213	0.981715	0.9717	0.991833	0.000419631	1
cg03187710	0.966329	0.948112	0.984895	0.000419658	1
cg15528501	0.905191	0.856452	0.956704	0.000419784	1
cg00328724	0.992038	0.987641	0.996454	0.000420026	1
cg13979800	1.05595	1.02448	1.08838	0.000420317	1
cg09004241	0.989474	0.983673	0.99531	0.000420419	1
cg03948437	0.972268	0.957191	0.987583	0.000420442	1
cg22732615	1.01004	1.00445	1.01566	0.000420581	1
cg12072529	0.977463	0.965159	0.989925	0.000420854	1
cg02603192	0.654428	0.51703	0.828338	0.000421379	1
cg01736389	0.97788	0.965795	0.990115	0.00042227	1
cg23954153	1.00907	1.00402	1.01414	0.000422293	1
cg27437721	1.00867	1.00384	1.01353	0.000422386	1
cg00284153	0.991771	0.987226	0.996337	0.000422444	1
cg21477317	0.893166	0.838791	0.951066	0.000422621	1
cg23732962	0.970241	0.954082	0.986674	0.000422651	1
cg21728825	0.841077	0.763918	0.92603	0.000423043	1
cg04436646	0.828015	0.745536	0.919618	0.000423142	1
cg01782066	0.987617	0.980797	0.994483	0.000423856	1
cg05051152	0.825186	0.741566	0.918235	0.000423883	1
cg02282849	0.761533	0.654482	0.886094	0.000424145	1
cg12032228	0.83448	0.754598	0.922818	0.00042428	1
cg14341051	1.01168	1.00517	1.01824	0.000424299	1
cg11455291	0.929529	0.892509	0.968084	0.000424658	1
cg07853758	1.01997	1.00881	1.03124	0.000424843	1
cg02574464	0.990763	0.985663	0.99589	0.00042486	1
cg19385321	0.979621	0.968467	0.990903	0.000424883	1
cg23224191	0.987777	0.981044	0.994557	0.000425177	1
cg00540558	0.949939	0.923188	0.977465	0.000425237	1
cg08726342	0.948255	0.92064	0.976697	0.00042561	1
cg14169521	1.03934	1.01727	1.06189	0.000425684	1
cg24418182	1.01142	1.00505	1.01782	0.000426046	1
cg02179112	0.939814	0.907916	0.972833	0.000426192	1
cg13432286	0.888075	0.831326	0.948699	0.00042659	1
cg17021442	0.866457	0.800043	0.938384	0.000426742	1
cg05833318	0.821501	0.736376	0.916466	0.000426931	1
cg15124560	0.895543	0.842219	0.952245	0.000427974	1
cg19876689	0.987336	0.980358	0.994363	0.00042803	1
cg17369091	0.8783	0.817112	0.944069	0.00042805	1
cg14599023	0.947701	0.919792	0.976458	0.000428233	1
cg15319522	0.987401	0.980458	0.994392	0.000428266	1
cg07592358	0.951738	0.925896	0.9783	0.000428295	1
cg26279216	1.00646	1.00286	1.01007	0.000428484	1
cg05095158	1.02901	1.01276	1.04551	0.000428694	1
cg08262764	0.916883	0.873653	0.962251	0.000428992	1
cg07892126	0.804296	0.712481	0.907943	0.000429106	1
cg08732456	0.982198	0.972426	0.992067	0.000429324	1
cg05260811	0.961951	0.941404	0.982947	0.00042943	1
cg20730619	0.970741	0.954828	0.986919	0.000429448	1
cg11125146	0.758192	0.649926	0.884493	0.000429451	1
cg07132942	0.989746	0.984083	0.99544	0.000429498	1
cg20297566	0.970155	0.95393	0.986656	0.000429842	1
cg05759182	0.887942	0.8311	0.948673	0.000429923	1
cg18013067	0.867071	0.800884	0.938727	0.000430405	1
cg17424056	0.8275	0.744713	0.91949	0.000430491	1
cg26944546	0.954709	0.93039	0.979665	0.000430707	1
cg20913137	0.757116	0.64846	0.883979	0.000431212	1
cg08055910	0.975156	0.96159	0.988912	0.000431688	1
cg07399288	0.855369	0.7841	0.933117	0.000432292	1
cg09754868	0.833613	0.753262	0.922534	0.000432888	1
cg07878955	0.973941	0.959722	0.98837	0.000433278	1
cg17943391	0.986712	0.979388	0.994091	0.00043332	1
cg13862851	0.988752	0.982542	0.995001	0.00043345	1
cg11587191	0.990505	0.985255	0.995782	0.000433456	1
cg17465861	0.841087	0.763786	0.92621	0.000434229	1
cg09440812	0.951603	0.925665	0.978268	0.000434438	1
cg08739233	1.0607	1.02645	1.0961	0.000434452	1
cg25599739	0.952236	0.926623	0.978557	0.000434633	1
cg20157525	0.993162	0.989373	0.996966	0.000434739	1
cg09608765	0.977743	0.965559	0.990082	0.000434974	1
cg25475516	0.964058	0.944596	0.983921	0.000435106	1
cg02079348	0.987092	0.979972	0.994264	0.000435971	1
cg02504541	0.927559	0.889493	0.967254	0.000436074	1
cg00456395	0.977785	0.965621	0.990103	0.00043619	1
cg08516083	0.978766	0.967129	0.990543	0.000436459	1
cg02708722	0.713174	0.590722	0.86101	0.000436523	1
cg03368362	0.847675	0.773093	0.929451	0.000436563	1
cg11678773	0.939315	0.907107	0.972666	0.00043673	1
cg02221303	0.914459	0.870001	0.96119	0.000437079	1
cg14343107	0.784566	0.685333	0.898168	0.000437117	1
cg13580226	0.96017	0.938662	0.98217	0.00043738	1
cg21229179	0.98049	0.969781	0.991317	0.000437675	1
cg05382565	0.828059	0.745398	0.919887	0.000437735	1
cg07451926	0.986689	0.979346	0.994087	0.000437966	1
cg15316206	1.01993	1.00877	1.03121	0.000438739	1
cg04746303	0.881145	0.821112	0.945567	0.000440369	1
cg09429529	0.984855	0.976509	0.993273	0.000440523	1
cg23842386	0.854771	0.783142	0.932952	0.000441094	1
cg19586199	0.989462	0.983633	0.995326	0.000441671	1
cg10696969	0.990298	0.984927	0.995698	0.00044191	1
cg20118823	0.976175	0.963133	0.989394	0.000442043	1
cg06415906	1.0313	1.01372	1.04919	0.000442361	1
cg09116251	0.86196	0.793409	0.936435	0.000442679	1
cg18436272	1.00651	1.00287	1.01016	0.000442715	1
cg15624725	0.898229	0.846023	0.953656	0.000442762	1
cg21882650	0.73936	0.624711	0.875049	0.000443801	1
cg07588779	0.95731	0.934285	0.980901	0.000444041	1
cg26989531	0.981752	0.971715	0.991894	0.000444303	1
cg18719294	0.880866	0.820667	0.945482	0.000444515	1
cg02839351	0.98778	0.981026	0.994581	0.000444573	1
cg20424398	0.707803	0.583641	0.858381	0.000445242	1
cg01430588	0.99157	0.986897	0.996266	0.000445353	1
cg01940713	0.98929	0.983363	0.995254	0.00044542	1
cg26912890	1.02515	1.01104	1.03947	0.000445772	1
cg17641118	0.942574	0.911965	0.97421	0.000446032	1
cg14929317	0.829647	0.747513	0.920805	0.000446161	1
cg23021268	0.992399	0.988182	0.996635	0.000446473	1
cg10503992	1.01268	1.00558	1.01983	0.00044674	1
cg09016822	0.944491	0.914854	0.975089	0.000446776	1
cg02943420	1.03206	1.01404	1.05041	0.000446887	1
cg07557424	0.94645	0.917811	0.975983	0.000447057	1
cg22633590	1.03551	1.01553	1.05589	0.000447303	1
cg11954852	0.97247	0.957431	0.987746	0.000447447	1
cg01764116	0.752848	0.642487	0.882165	0.000447824	1
cg20385120	0.907009	0.858899	0.957813	0.000448072	1
cg17212073	0.833299	0.75262	0.922626	0.000448189	1
cg21280320	0.99093	0.985901	0.995986	0.00044964	1
cg10853063	0.875318	0.812573	0.942909	0.000449838	1
cg02848157	0.983719	0.97474	0.99278	0.000449888	1
cg25217625	0.861727	0.792992	0.936419	0.000449954	1
cg05240479	1.03161	1.01383	1.0497	0.000450701	1
cg08692295	0.98365	0.974633	0.992751	0.000450745	1
cg05216268	0.9835	0.974398	0.992686	0.000452307	1
cg05339305	0.823003	0.738123	0.917645	0.000452334	1
cg08056211	0.951264	0.92507	0.9782	0.000452958	1
cg10700424	1.01151	1.00506	1.018	0.000453837	1
cg15238382	0.990425	0.985113	0.995765	0.000453897	1
cg22857872	0.825653	0.741805	0.918979	0.00045427	1
cg24040299	0.979063	0.967551	0.990711	0.000454294	1
cg03313752	0.985806	0.97796	0.993716	0.000454626	1
cg11432275	0.977282	0.964808	0.989917	0.000454766	1
cg06179645	0.934315	0.899493	0.970487	0.000455245	1
cg26924825	0.985113	0.976887	0.993408	0.000455267	1
cg25918716	0.947088	0.918735	0.976317	0.000455744	1
cg20710258	0.992275	0.987982	0.996587	0.000456553	1
cg19875498	0.990914	0.985869	0.995985	0.000457024	1
cg05041517	0.985073	0.97682	0.993395	0.000458637	1
cg06346505	0.988514	0.982145	0.994924	0.000460082	1
cg13601636	0.990453	0.985151	0.995784	0.000460138	1
cg04101699	0.985239	0.977075	0.993471	0.000460153	1
cg13564456	0.896087	0.842726	0.952826	0.000460737	1
cg05100917	0.987453	0.980501	0.994455	0.000460848	1
cg09859491	0.968038	0.950599	0.985797	0.000461365	1
cg03217744	0.948083	0.920208	0.976802	0.000462685	1
cg19854293	0.977578	0.965247	0.990067	0.000462929	1
cg15432414	0.926911	0.888353	0.967143	0.000463334	1
cg00831222	1.00931	1.00409	1.01456	0.000464495	1
cg27077673	0.986209	0.97857	0.993907	0.000464705	1
cg16043368	0.976859	0.964136	0.98975	0.000464728	1
cg25680916	0.961004	0.939835	0.982649	0.000464999	1
cg07357683	0.986935	0.979694	0.99423	0.000465196	1
cg23981320	0.984775	0.97635	0.993272	0.000465449	1
cg08258667	0.98525	0.977084	0.993484	0.000465973	1
cg26276947	0.981422	0.971168	0.991784	0.000466009	1
cg18450168	1.02169	1.00949	1.03405	0.000466263	1
cg17083504	0.927202	0.888767	0.967299	0.000466704	1
cg15638768	1.00816	1.00358	1.01277	0.000467006	1
cg12640109	0.984962	0.976638	0.993358	0.000467304	1
cg17213402	1.00619	1.00272	1.00967	0.000468077	1
cg22810163	0.948967	0.921522	0.977229	0.000468254	1
cg15972301	0.985112	0.976867	0.993426	0.000468302	1
cg08466968	0.976266	0.963215	0.989494	0.000468738	1
cg09853387	0.929618	0.892371	0.968421	0.000468846	1
cg03496978	0.963529	0.943677	0.983798	0.00046913	1
cg27401539	0.986219	0.978581	0.993918	0.000469172	1
cg12117212	0.984524	0.975957	0.993167	0.000469435	1
cg02282382	0.965048	0.945997	0.984483	0.000469977	1
cg11830346	0.886064	0.827986	0.948215	0.000470053	1
cg06341370	0.931267	0.894833	0.969185	0.000470322	1
cg25517151	0.939953	0.907891	0.973149	0.000470398	1
cg02781704	0.890149	0.833944	0.950142	0.00047076	1
cg10136738	0.778186	0.676137	0.895637	0.000470933	1
cg04464219	0.944436	0.914653	0.975189	0.000470958	1
cg23811837	0.915661	0.871535	0.962022	0.000471552	1
cg23744182	1.00665	1.00292	1.0104	0.000471793	1
cg09537256	0.915614	0.871458	0.962007	0.000472427	1
cg15218096	0.965982	0.947416	0.984911	0.00047318	1
cg13480902	0.986699	0.979318	0.994135	0.000473419	1
cg02110527	0.981187	0.970793	0.991692	0.000473535	1
cg23091167	0.972834	0.957925	0.987976	0.000473808	1
cg27182210	0.912367	0.86663	0.960518	0.000473921	1
cg21535247	0.795391	0.699564	0.904344	0.00047403	1
cg12583369	0.989745	0.98404	0.995483	0.000474046	1
cg19939773	0.989201	0.983196	0.995243	0.00047413	1
cg02473288	0.887737	0.830387	0.949048	0.000474498	1
cg13274149	0.989871	0.984235	0.99554	0.00047514	1
cg03774514	1.0075	1.00328	1.01172	0.00047516	1
cg18123596	0.937162	0.903657	0.971909	0.000476016	1
cg07090025	0.939986	0.90791	0.973194	0.00047614	1
cg18258620	0.986271	0.978651	0.99395	0.000476536	1
cg17861458	0.947598	0.919411	0.976648	0.000476537	1
cg24114444	1.00744	1.00326	1.01163	0.000476639	1
cg24430419	1.00792	1.00347	1.01239	0.000476735	1
cg16911548	0.971883	0.956456	0.98756	0.000477149	1
cg13714271	0.978588	0.966775	0.990544	0.000477166	1
cg15586679	0.797811	0.702843	0.905611	0.000477245	1
cg08969094	0.911149	0.864799	0.959982	0.00047732	1
cg20999565	0.988705	0.982424	0.995027	0.000477638	1
cg16909408	1.00816	1.00357	1.01276	0.000478371	1
cg00559635	0.983507	0.97437	0.992729	0.000478479	1
cg20897667	0.987484	0.98053	0.994489	0.000478514	1
cg05900430	0.670788	0.536123	0.839279	0.00047866	1
cg15726378	0.86221	0.793374	0.937018	0.000478797	1
cg17930183	1.02589	1.01128	1.04071	0.000479626	1
cg27015057	1.02609	1.01136	1.04104	0.000479692	1
cg05708550	0.970612	0.954496	0.987	0.000479752	1
cg01425967	0.989869	0.984226	0.995544	0.000480935	1
cg03146079	0.90925	0.861959	0.959136	0.000481249	1
cg18504532	0.776383	0.673536	0.894935	0.000481254	1
cg00940020	0.862307	0.793475	0.93711	0.000482423	1
cg07248951	0.897506	0.844627	0.953695	0.000482611	1
cg10982746	0.840301	0.762079	0.926551	0.000482651	1
cg25490175	0.825115	0.740683	0.919172	0.000482659	1
cg02999108	0.902281	0.851653	0.955919	0.00048291	1
cg11349631	0.988594	0.982245	0.994984	0.000483694	1
cg14443472	0.988325	0.981828	0.994866	0.000483981	1
cg03267254	1.07618	1.0327	1.1215	0.000485025	1
cg11948865	0.983314	0.974063	0.992653	0.000485179	1
cg14536784	0.915668	0.871451	0.962128	0.000485188	1
cg04229842	0.953244	0.927943	0.979236	0.000485351	1
cg01839688	0.978818	0.967114	0.990664	0.000486154	1
cg20793809	0.980731	0.970068	0.991512	0.000486296	1
cg02854228	0.989489	0.983631	0.995381	0.00048652	1
cg12527260	0.979843	0.968694	0.99112	0.000487051	1
cg09516302	0.871066	0.80605	0.941327	0.000487197	1
cg01735191	0.925717	0.886419	0.966758	0.000487658	1
cg03711854	0.986851	0.979536	0.99422	0.000488439	1
cg15099042	0.803971	0.711167	0.908885	0.000489231	1
cg25793692	0.958308	0.935639	0.981527	0.000489376	1
cg22006825	0.97846	0.966555	0.990512	0.000489706	1
cg03260765	0.991505	0.986761	0.996272	0.000489801	1
cg01861284	0.759207	0.650277	0.886385	0.000489931	1
cg14310696	0.944189	0.914188	0.975175	0.000490731	1
cg08134631	1.02531	1.011	1.03982	0.000490875	1
cg26576136	0.884841	0.826013	0.947858	0.000491059	1
cg03620551	0.919539	0.877173	0.963951	0.000491071	1
cg12136126	0.9526	0.926939	0.978971	0.000491364	1
cg24153548	0.931471	0.895017	0.96941	0.000491756	1
cg04936382	0.940937	0.909267	0.97371	0.000491941	1
cg16736279	0.991626	0.986947	0.996327	0.000492559	1
cg19386303	0.935553	0.901147	0.971271	0.000492586	1
cg22306928	1.01451	1.00632	1.02276	0.00049274	1
cg02107564	0.847156	0.771695	0.929995	0.000492762	1
cg20407704	0.987791	0.98099	0.99464	0.000492885	1
cg17875957	0.832367	0.750745	0.922863	0.000493221	1
cg12764921	0.904461	0.854785	0.957023	0.000493795	1
cg03368358	0.990747	0.985579	0.995942	0.000494675	1
cg04988918	0.986813	0.97947	0.994211	0.000494856	1
cg11331556	0.982132	0.972219	0.992146	0.000495047	1
cg01281501	0.987804	0.981007	0.994648	0.000495183	1
cg06320277	0.986281	0.978644	0.993978	0.000495628	1
cg26106921	0.985708	0.977755	0.993725	0.000495994	1
cg15114836	0.916658	0.87285	0.962665	0.000496114	1
cg15814405	0.8834	0.823863	0.947239	0.00049661	1
cg14252395	0.983899	0.974951	0.992928	0.000496745	1
cg22394521	0.85626	0.784645	0.934411	0.000497168	1
cg04865575	0.571813	0.417471	0.783215	0.00049717	1
cg05855618	1.01231	1.00536	1.01931	0.000497955	1
cg11811131	0.883735	0.824339	0.94741	0.000497978	1
cg04548926	0.987008	0.979769	0.9943	0.000498061	1
cg22807192	0.956539	0.93291	0.980767	0.00049828	1
cg18010762	0.925313	0.885748	0.966646	0.00049871	1
cg09731087	0.949168	0.921695	0.977459	0.000498791	1
cg27231068	0.987604	0.980694	0.994564	0.000498931	1
cg14032528	0.861805	0.792578	0.937078	0.000499362	1
cg15812599	0.981865	0.971799	0.992036	0.000499871	1
cg24643102	0.992489	0.988284	0.996712	0.000501046	1
cg26543917	0.691422	0.56168	0.851132	0.000501128	1
cg04270736	0.784669	0.684493	0.899507	0.000501904	1
cg27236242	0.927547	0.889074	0.967685	0.000501915	1
cg05493679	0.884109	0.824847	0.947628	0.000502216	1
cg00999623	0.960382	0.938762	0.982501	0.000502293	1
cg05654404	0.9703	0.953959	0.98692	0.000502653	1
cg03204605	1.02438	1.01058	1.03838	0.000502791	1
cg06145862	0.980289	0.969355	0.991346	0.000503794	1
cg27049318	0.946241	0.917233	0.976167	0.000504432	1
cg07787977	0.987142	0.979969	0.994368	0.000505725	1
cg22004227	0.976649	0.963728	0.989744	0.000507144	1
cg27300619	0.986214	0.978527	0.993962	0.000507171	1
cg04997273	1.03042	1.01316	1.04798	0.000507302	1
cg10797726	0.927241	0.888582	0.967582	0.00050767	1
cg02498702	0.985701	0.977728	0.993739	0.000509809	1
cg04327181	1.01857	1.00806	1.0292	0.000509895	1
cg25631940	0.82064	0.734073	0.917416	0.000510049	1
cg13537781	0.960311	0.938627	0.982496	0.000510087	1
cg26192857	0.682267	0.549936	0.846441	0.000510097	1
cg04550063	0.950037	0.922968	0.977899	0.000510313	1
cg25614222	0.939409	0.906871	0.973115	0.000510458	1
cg23672346	0.731683	0.613479	0.872663	0.000510775	1
cg23013931	0.878019	0.815901	0.944868	0.000511315	1
cg20469991	0.919504	0.876992	0.964078	0.000511528	1
cg01278797	0.970724	0.95459	0.987131	0.00051171	1
cg12771053	0.965654	0.946801	0.984883	0.00051238	1
cg23669611	1.01539	1.00668	1.02417	0.000512813	1
cg12630461	1.01196	1.0052	1.01877	0.000513264	1
cg23832825	0.97691	0.964117	0.989872	0.000513503	1
cg06697536	1.01424	1.00618	1.02237	0.000514057	1
cg15651980	0.989445	0.983539	0.995387	0.00051407	1
cg10707775	1.05549	1.0238	1.08816	0.000515278	1
cg27318157	0.963901	0.944105	0.984112	0.000515315	1
cg13311509	1.05944	1.02547	1.09454	0.000515786	1
cg16371956	0.94267	0.911772	0.974615	0.000516309	1
cg17513325	0.980122	0.969076	0.991294	0.000516326	1
cg05139152	0.983403	0.974156	0.992739	0.000517117	1
cg13299728	0.989022	0.982876	0.995206	0.000518665	1
cg22485372	0.977923	0.965673	0.990329	0.000518789	1
cg22605179	0.907752	0.859472	0.958744	0.000518802	1
cg11305202	0.957258	0.933933	0.981164	0.000518843	1
cg04432617	0.890626	0.834234	0.950829	0.000518875	1
cg25705900	0.965185	0.946063	0.984694	0.000519008	1
cg13571582	0.9865	0.978957	0.994101	0.000519282	1
cg14620234	0.989843	0.984152	0.995566	0.000519398	1
cg22916109	0.761859	0.653377	0.888353	0.000519449	1
cg11670802	0.963163	0.942961	0.983798	0.000519797	1
cg09039506	0.991086	0.986086	0.99611	0.000519805	1
cg03899609	0.856624	0.784919	0.93488	0.000521072	1
cg04892487	0.743503	0.628886	0.87901	0.000521133	1
cg09130091	0.98727	0.98015	0.994441	0.000521394	1
cg15019790	1.01823	1.00789	1.02867	0.000521723	1
cg09357831	0.988895	0.982676	0.995154	0.000522031	1
cg09859492	0.985408	0.977258	0.993627	0.000523012	1
cg04347624	0.916376	0.872251	0.962733	0.000523672	1
cg15276655	0.903196	0.852694	0.956689	0.000523994	1
cg27049201	0.951976	0.925862	0.978825	0.000524148	1
cg10972865	0.848669	0.773505	0.931137	0.000524532	1
cg07219643	0.859326	0.788754	0.936212	0.000525304	1
cg17595410	0.798134	0.702622	0.90663	0.000525769	1
cg12531328	0.922029	0.880672	0.965328	0.000526161	1
cg14256396	0.899056	0.846567	0.954799	0.000526292	1
cg13940218	0.985131	0.976822	0.993509	0.000526426	1
cg24155190	0.979442	0.968005	0.991014	0.000527809	1
cg08734623	0.986437	0.978848	0.994084	0.000528234	1
cg23176436	0.864869	0.79669	0.938882	0.000529615	1
cg04217658	0.862107	0.792704	0.937587	0.000530347	1
cg14965353	0.913394	0.867768	0.961419	0.000530528	1
cg11783050	1.06384	1.02724	1.10175	0.000530971	1
cg06299537	1.38567	1.15218	1.66646	0.000531002	1
cg21735648	0.731077	0.612348	0.872827	0.000531684	1
cg09983459	0.971543	0.955802	0.987542	0.000531817	1
cg13707729	0.988505	0.98206	0.994993	0.000532037	1
cg25960567	1.63532	1.23805	2.16007	0.000532503	1
cg18468572	0.980203	0.969175	0.991357	0.00053267	1
cg20100620	0.984955	0.976542	0.99344	0.000532854	1
cg26229607	0.984014	0.975081	0.993028	0.00053294	1
cg21249126	1.04193	1.01799	1.06643	0.000533167	1
cg02757179	0.985969	0.978116	0.993885	0.000533428	1
cg20656751	0.989224	0.983177	0.995308	0.000533904	1
cg17512782	0.902186	0.851128	0.956307	0.000534218	1
cg10592766	0.990943	0.985853	0.996059	0.000534353	1
cg00157319	0.982051	0.972034	0.992171	0.000535079	1
cg00145979	0.886072	0.827435	0.948864	0.000535089	1
cg05228802	0.90752	0.859013	0.958766	0.000535398	1
cg18055075	1.01127	1.00488	1.01771	0.000535936	1
cg04401646	0.947449	0.918932	0.976851	0.000536074	1
cg09906941	0.908828	0.860947	0.959373	0.000536319	1
cg06269928	0.98461	0.976001	0.993294	0.000536774	1
cg09899173	1.01431	1.00618	1.0225	0.00053711	1
cg09386620	1.00756	1.00327	1.01187	0.000537138	1
cg21879725	0.975723	0.962236	0.989398	0.000538249	1
cg07751222	0.919427	0.876705	0.96423	0.000539327	1
[truncated: 309,894+ more rows]
