# Supplementary material for: Epigenome-wide gene–age interaction analysis reveals reversed effects of PRODH DNA methylation on survival between young and elderly early-stage NSCLC patients
Source: Aging (Albany NY). 2020 Jun 8;12(11):10642–62. doi: 10.18632/aging.103284 (PMC7346054; doi:10.18632/aging.103284)
Supplement: Supplementary Material 2 [file aging-12-103284-s006..xlsx]

## Sheet: Supp2_LUSC_Discovery
Supplementary Material 2. Epigenome-wide association results in LUSC patients. Only summary results of interaction terms were shown in the table.
CpG	Discovery phase
	HR	LCI	UCI	pvalue	Bonf
cg20907517	0.86627	0.817176	0.918315	1.41641e-06	0.441766	*Only summary results of interaction terms were shown in the table
cg04992127	1.04428	1.02578	1.06312	2.03179e-06	0.633698
cg06524099	1.59095	1.30871	1.93407	3.16159e-06	0.986071
cg13048466	0.959031	0.942154	0.976209	3.87172e-06	1
cg08327706	1.05487	1.03116	1.07913	4.10852e-06	1
cg11799480	0.964549	0.949773	0.979554	4.58867e-06	1
cg11969474	1.5037	1.26178	1.792	5.16131e-06	1
cg15091407	1.04586	1.02579	1.06633	5.77076e-06	1
cg07291639	0.961351	0.945101	0.97788	5.85298e-06	1
cg14534884	1.02392	1.01341	1.03454	7.13696e-06	1
cg05589489	1.01596	1.00884	1.02313	1.02595e-05	1
cg17665497	0.973465	0.96187	0.985199	1.08687e-05	1
cg08936682	0.43953	0.304373	0.634704	1.16125e-05	1
cg06939061	6.21736	2.73977	14.1091	1.23939e-05	1
cg14466680	2.42289	1.62443	3.61383	1.43566e-05	1
cg17171801	1.33717	1.17197	1.52565	1.57083e-05	1
cg09524455	1.0509	1.02726	1.07508	1.88768e-05	1
cg24194077	1.08248	1.04369	1.1227	2.07355e-05	1
cg12473767	0.971419	0.95853	0.984481	2.08957e-05	1
cg16865138	0.957228	0.93808	0.976768	2.23639e-05	1
cg16520101	2.05135	1.46786	2.86677	2.5815e-05	1
cg13716638	1.76507	1.35362	2.30158	2.71737e-05	1
cg11318133	0.844343	0.779986	0.91401	2.88021e-05	1
cg19296405	0.980023	0.970793	0.989342	2.9249e-05	1
cg02942594	1.09695	1.05035	1.14562	2.94271e-05	1
cg26054130	0.914529	0.87688	0.953795	3.10617e-05	1
cg07011093	0.983185	0.975366	0.991067	3.14972e-05	1
cg17804177	1.30682	1.15185	1.48265	3.25383e-05	1
cg08768569	1.02723	1.01423	1.04041	3.5816e-05	1
cg08116792	1.07883	1.0407	1.11836	3.58383e-05	1
cg02689023	2.26858	1.5354	3.35187	3.90759e-05	1
cg08665801	1.95626	1.42059	2.69391	3.94785e-05	1
cg25841139	1.76983	1.34686	2.32563	4.18545e-05	1
cg17047515	1.76787	1.34537	2.32305	4.33197e-05	1
cg27606337	0.854025	0.791759	0.921187	4.40094e-05	1
cg26504021	1.02159	1.01117	1.03212	4.46504e-05	1
cg09343402	1.13847	1.06968	1.21168	4.53864e-05	1
cg15249211	0.832839	0.762703	0.909425	4.59685e-05	1
cg03516577	0.973436	0.960905	0.986132	4.65274e-05	1
cg14583825	1.05337	1.02724	1.08017	4.98095e-05	1
cg03170611	1.06414	1.03259	1.09666	5.14902e-05	1
cg19974474	1.95517	1.41262	2.70611	5.27618e-05	1
cg26607933	0.959773	0.940844	0.979082	5.34471e-05	1
cg21816001	1.62647	1.28454	2.0594	5.35619e-05	1
cg06384413	1.12576	1.06285	1.19239	5.40574e-05	1
cg00684776	1.12222	1.06091	1.18707	5.75085e-05	1
cg06949053	1.21176	1.10345	1.33069	5.80329e-05	1
cg00493554	0.961543	0.943336	0.980102	5.80659e-05	1
cg03221698	0.873655	0.81798	0.93312	5.81137e-05	1
cg04026887	0.9823	0.973784	0.990892	5.833e-05	1
cg06163701	0.950193	0.926812	0.974163	5.83852e-05	1
cg12488558	1.04461	1.02259	1.0671	5.95067e-05	1
cg13801193	0.979192	0.969186	0.989302	6.01075e-05	1
cg22838050	0.980523	0.971145	0.989991	6.02687e-05	1
cg04209971	1.71476	1.31673	2.2331	6.28591e-05	1
cg21053539	1.1649	1.08093	1.25539	6.36671e-05	1
cg25343227	0.982328	0.97378	0.990952	6.38581e-05	1
cg14435492	0.905564	0.862518	0.950758	6.54857e-05	1
cg17155612	1.14003	1.06898	1.21581	6.56657e-05	1
cg11994052	0.977713	0.966935	0.988612	6.75032e-05	1
cg22115808	2.2321	1.50375	3.31322	6.76648e-05	1
cg18766809	1.48017	1.22048	1.7951	6.76666e-05	1
cg08974244	0.983252	0.975111	0.991461	6.84108e-05	1
cg17871739	1.04527	1.02271	1.06833	6.97699e-05	1
cg15442728	1.11251	1.05555	1.17253	6.99596e-05	1
cg18844210	1.0371	1.01862	1.05591	7.12733e-05	1
cg02091100	0.977843	0.967083	0.988723	7.22025e-05	1
cg24115818	1.49528	1.22573	1.82412	7.28272e-05	1
cg22466678	1.01602	1.00808	1.02404	7.28773e-05	1
cg11108432	3.7813	1.9587	7.29983	7.3974e-05	1
cg07664760	1.3902	1.18103	1.63642	7.4995e-05	1
cg03962506	1.49626	1.22489	1.82774	7.92261e-05	1
cg26470696	0.97346	0.960536	0.986559	8.00385e-05	1
cg19918027	0.977249	0.966134	0.988491	8.03012e-05	1
cg19721215	3.23256	1.8041	5.79205	8.04834e-05	1
cg25518968	0.963058	0.94517	0.981284	8.31708e-05	1
cg17497560	0.899186	0.852822	0.948071	8.34625e-05	1
cg06104935	0.970368	0.955918	0.985038	8.52129e-05	1
cg13053817	1.12094	1.05884	1.18668	8.62808e-05	1
cg12488414	1.05684	1.02806	1.08643	8.70227e-05	1
cg02311432	1.08857	1.04338	1.13571	8.7451e-05	1
cg26224223	1.06698	1.03297	1.1021	8.75393e-05	1
cg16619071	1.07691	1.03777	1.11752	8.76053e-05	1
cg11743349	1.02049	1.01019	1.0309	8.95337e-05	1
cg03736013	1.02697	1.01339	1.04074	8.97611e-05	1
cg11552694	1.0238	1.01182	1.03592	8.97877e-05	1
cg06531034	0.977861	0.966952	0.988893	9.17963e-05	1
cg08447842	0.954821	0.93295	0.977205	9.21703e-05	1
cg10816687	0.94738	0.92203	0.973428	9.3794e-05	1
cg20135711	0.921823	0.884929	0.960255	9.38055e-05	1
cg03125565	2.06412	1.43454	2.96999	9.47257e-05	1
cg03719314	2.09856	1.44608	3.04544	9.56837e-05	1
cg16778527	0.892503	0.842937	0.944983	9.57661e-05	1
cg03373080	0.306188	0.168928	0.554977	9.59994e-05	1
cg09764697	1.62024	1.2712	2.06511	9.6793e-05	1
cg27628707	0.974995	0.962658	0.987491	9.72395e-05	1
cg05258214	1.23358	1.10994	1.37099	9.79203e-05	1
cg12573253	0.943459	0.916216	0.971511	9.88632e-05	1
cg16068401	1.09556	1.0463	1.14715	0.000101082	1
cg05158566	0.62946	0.498336	0.795086	0.000102753	1
cg08285587	1.63804	1.27685	2.10141	0.000103237	1
cg26032489	1.09245	1.04469	1.14239	0.000105837	1
cg18936502	1.02116	1.0104	1.03204	0.000106592	1
cg00862588	0.97029	0.955585	0.985221	0.000108369	1
cg12386509	0.972104	0.958269	0.98614	0.000109585	1
cg26792700	0.933114	0.900944	0.966434	0.000110058	1
cg19758448	0.979324	0.969004	0.989753	0.000110819	1
cg27312359	0.285513	0.151193	0.539165	0.000111345	1
cg09235689	1.85628	1.35636	2.54045	0.000111578	1
cg21869951	1.47377	1.21054	1.79424	0.00011191	1
cg03490148	0.977919	0.966903	0.989061	0.000112027	1
cg11974977	2.18153	1.46791	3.24208	0.00011393	1
cg06966613	0.974477	0.961756	0.987366	0.000115067	1
cg11837102	0.964603	0.94707	0.98246	0.000117774	1
cg08802841	1.01754	1.00857	1.02658	0.000118994	1
cg23726427	0.980101	0.970116	0.990188	0.000119362	1
cg02581963	0.852634	0.786117	0.92478	0.000119616	1
cg14220329	0.976691	0.96502	0.988504	0.000120537	1
cg18002862	0.974669	0.961981	0.987524	0.000124141	1
cg20039944	0.512621	0.364379	0.721172	0.000124606	1
cg10219093	1.13002	1.0615	1.20296	0.000128163	1
cg04295928	0.923866	0.887148	0.962104	0.000129725	1
cg02765731	0.977154	0.965652	0.988793	0.000130497	1
cg25693289	1.03503	1.01692	1.05346	0.000131301	1
cg08112448	1.33554	1.15129	1.54927	0.000133427	1
cg01707076	0.84623	0.776721	0.92196	0.000134525	1
cg16723189	1.24291	1.11136	1.39002	0.000139011	1
cg09210315	0.969298	0.953854	0.984991	0.000141591	1
cg00244654	2.29333	1.49551	3.51677	0.000141803	1
cg02433139	0.910273	0.867237	0.955445	0.000142121	1
cg09225424	3.02376	1.70889	5.35032	0.000144476	1
cg21288364	1.02926	1.01405	1.0447	0.000147119	1
cg05284742	1.01871	1.009	1.02851	0.000148831	1
cg19378376	1.68015	1.28481	2.19714	0.000150101	1
cg21048874	1.16243	1.07539	1.25651	0.00015033	1
cg02096194	0.974409	0.961417	0.987575	0.000153318	1
cg08479073	1.01668	1.008	1.02542	0.000154149	1
cg25741116	0.957359	0.935973	0.979234	0.000156557	1
cg27243121	1.04855	1.02309	1.07465	0.000156829	1
cg15600365	1.25769	1.11668	1.41651	0.0001575	1
cg23299989	0.706923	0.590483	0.846324	0.000158751	1
cg00796821	0.972299	0.958226	0.986578	0.000159043	1
cg17023972	1.26835	1.12105	1.43501	0.000160585	1
cg12182940	1.12629	1.05882	1.19807	0.000161237	1
cg26372792	1.37837	1.1666	1.62858	0.000162873	1
cg09255318	1.05725	1.02709	1.08829	0.000163418	1
cg26821327	1.05667	1.02678	1.08743	0.000166492	1
cg02599293	0.718503	0.604908	0.853431	0.000166557	1
cg23290834	2.61868	1.5864	4.32268	0.000166869	1
cg27116770	1.03976	1.01886	1.06108	0.000167335	1
cg16243756	1.02774	1.01316	1.04252	0.000174218	1
cg08130612	1.17577	1.08045	1.2795	0.000174278	1
cg26459419	1.12443	1.05763	1.19544	0.000174592	1
cg17405908	0.803665	0.716965	0.90085	0.000174927	1
cg20141751	1.8203	1.33127	2.48898	0.000175133	1
cg08214847	1.03238	1.01532	1.04973	0.000177684	1
cg27603720	0.869288	0.807899	0.935342	0.000177685	1
cg20864389	1.06089	1.02859	1.09421	0.000179453	1
cg04870470	1.01934	1.00918	1.02961	0.000179679	1
cg08862742	1.01454	1.0069	1.02223	0.000181188	1
cg03963219	0.979677	0.969201	0.990267	0.000181777	1
cg15009575	0.97706	0.965258	0.989006	0.000181878	1
cg08850400	0.908752	0.864314	0.955475	0.000183644	1
cg27168410	1.05136	1.02412	1.07932	0.000184365	1
cg13607226	1.01995	1.00944	1.03056	0.000184698	1
cg22014112	0.988433	0.982421	0.994481	0.000185638	1
cg09473664	1.27895	1.12405	1.45519	0.00018744	1
cg15234312	1.08566	1.03983	1.13351	0.000187618	1
cg17046484	0.977356	0.965679	0.989175	0.000187884	1
cg27560132	0.976634	0.964587	0.988832	0.000188933	1
cg25973895	1.03884	1.01826	1.05985	0.000190482	1
cg00912164	0.966397	0.949196	0.983909	0.000191153	1
cg19886701	1.0293	1.0138	1.04504	0.000191715	1
cg13547925	0.570846	0.425034	0.766681	0.000194962	1
cg17024452	0.912711	0.869879	0.957653	0.000195798	1
cg16122716	0.977593	0.966002	0.989322	0.000195981	1
cg00192636	0.916848	0.875885	0.959727	0.000197169	1
cg08272513	0.914202	0.872015	0.95843	0.000198168	1
cg13986536	1.03714	1.0174	1.05727	0.000200397	1
cg07080007	1.79856	1.31957	2.45141	0.000203167	1
cg25994616	1.10068	1.04636	1.15782	0.000203176	1
cg12570712	1.01753	1.00824	1.02691	0.000203816	1
cg06728974	1.06216	1.02887	1.09653	0.000205969	1
cg18643093	0.983869	0.975453	0.992357	0.000206998	1
cg19603784	0.920065	0.880449	0.961464	0.000207285	1
cg04056678	0.694217	0.572392	0.84197	0.000209611	1
cg10507365	1.98464	1.38132	2.85148	0.000209692	1
cg19497734	1.26071	1.11524	1.42514	0.000212481	1
cg23987491	0.978557	0.967395	0.989848	0.000212844	1
cg14710529	1.06244	1.02892	1.09705	0.000213006	1
cg05903444	1.01769	1.00829	1.02719	0.000214333	1
cg13395333	1.34196	1.14826	1.56834	0.000217203	1
cg04646113	1.32713	1.14215	1.54207	0.000219508	1
cg24056028	2.30729	1.48087	3.59488	0.000219567	1
cg00470955	1.04266	1.01979	1.06604	0.000222676	1
cg03871104	0.982643	0.973549	0.991822	0.000223375	1
cg04441405	0.988984	0.983183	0.994818	0.00022341	1
cg21573582	0.416587	0.261606	0.663381	0.000225253	1
cg20172258	1.01828	1.00852	1.02813	0.000227886	1
cg22473312	1.10317	1.04704	1.16231	0.000228385	1
cg14766231	0.984365	0.976148	0.992651	0.000229095	1
cg27166581	0.984853	0.976885	0.992885	0.000230688	1
cg03161309	0.980798	0.970727	0.990973	0.000231453	1
cg16070279	0.977469	0.965681	0.989401	0.000231991	1
cg05045130	1.04459	1.02061	1.06914	0.000232254	1
cg13985234	0.980056	0.969594	0.990631	0.000234186	1
cg17654660	0.974159	0.960664	0.987843	0.000234536	1
cg13552999	1.14597	1.06571	1.23226	0.000234968	1
cg02357257	0.907446	0.861671	0.955653	0.000235478	1
cg14613470	1.03763	1.0174	1.05827	0.000236532	1
cg16427967	11.6773	3.14931	43.2979	0.000237172	1
cg04387175	0.970223	0.954708	0.985991	0.000237588	1
cg17385483	0.979526	0.968779	0.990393	0.000237964	1
cg13717880	0.814559	0.730151	0.908726	0.000238085	1
cg20361205	0.931027	0.8962	0.967207	0.000238711	1
cg22374233	1.02865	1.01326	1.04428	0.000240559	1
cg15643428	1.05113	1.02352	1.07948	0.000240769	1
cg02458065	1.02948	1.01362	1.04559	0.00024543	1
cg01815921	2.50079	1.53198	4.08226	0.000246345	1
cg13073894	1.24777	1.1085	1.40452	0.000246371	1
cg12861797	0.983036	0.974084	0.99207	0.000246475	1
cg00429497	1.02067	1.00957	1.0319	0.000246519	1
cg11649068	1.05457	1.02503	1.08496	0.000246698	1
cg20131578	1.21038	1.09286	1.34053	0.000248224	1
cg19546356	0.850359	0.77973	0.927385	0.000248346	1
cg07447922	1.01832	1.00848	1.02826	0.000248675	1
cg12604181	0.93195	0.897443	0.967783	0.000251078	1
cg20586051	0.911392	0.867206	0.957828	0.00025292	1
cg26683316	0.728094	0.614259	0.863025	0.00025397	1
cg24701232	1.12901	1.05795	1.20485	0.000254078	1
cg24724832	0.979192	0.968222	0.990287	0.000254218	1
cg00091302	1.02226	1.01027	1.03439	0.000254355	1
cg22882539	1.05575	1.0255	1.08689	0.000254403	1
cg10596108	1.34009	1.14535	1.56793	0.000258219	1
cg13643506	0.719921	0.603548	0.858732	0.000259245	1
cg00725138	0.973209	0.959125	0.9875	0.000261097	1
cg01699630	0.961507	0.941449	0.981993	0.000263028	1
cg00663396	1.0193	1.00888	1.02982	0.000264893	1
cg25909885	1.12711	1.0569	1.20199	0.000266248	1
cg21174792	1.57757	1.23465	2.01573	0.000266809	1
cg02747254	1.01742	1.00801	1.02691	0.000267712	1
cg25457191	0.817653	0.733753	0.911147	0.000267916	1
cg14166395	0.72142	0.605171	0.859999	0.000270174	1
cg06156157	0.770882	0.670058	0.886876	0.000274129	1
cg23757365	0.967449	0.950355	0.98485	0.000274405	1
cg03875091	0.936525	0.904007	0.970212	0.000275663	1
cg04137037	2.04777	1.39156	3.01342	0.000276531	1
cg11340603	0.981638	0.971875	0.991499	0.000279031	1
cg00891886	0.978384	0.966912	0.989993	0.000282148	1
cg21318213	1.02814	1.01285	1.04365	0.000282536	1
cg00461905	1.0631	1.02854	1.09882	0.000284151	1
cg05464534	0.835608	0.758355	0.920731	0.000285011	1
cg15710789	1.39146	1.16395	1.66344	0.00028713	1
cg26514793	1.01281	1.00587	1.0198	0.00028783	1
cg00741731	1.05353	1.02424	1.08365	0.000288365	1
cg07081267	0.303008	0.158884	0.577866	0.000289055	1
cg08566044	13.3214	3.28279	54.0577	0.000290875	1
cg24643393	0.980031	0.969396	0.990784	0.000291157	1
cg04838832	0.988303	0.982033	0.994614	0.000291364	1
cg04818919	1.04576	1.02071	1.07143	0.000298278	1
cg00452266	0.971003	0.955641	0.986611	0.000298468	1
cg11724735	0.872564	0.810401	0.939494	0.000300156	1
cg10669058	0.985912	0.978357	0.993526	0.000300461	1
cg20500869	0.985019	0.976991	0.993114	0.000300537	1
cg26945813	1.26981	1.11542	1.44556	0.000304406	1
cg05976695	2.18415	1.42906	3.33821	0.000306798	1
cg18261783	0.870868	0.807877	0.938772	0.000306987	1
cg04609959	0.905742	0.858272	0.955838	0.000312913	1
cg03863549	0.665699	0.533541	0.830593	0.000313525	1
cg12756753	0.956618	0.93381	0.979983	0.00031548	1
cg01247537	0.985711	0.978014	0.993469	0.000320263	1
cg05531134	1.31588	1.13303	1.52823	0.000322904	1
cg00168118	1.01335	1.00605	1.0207	0.000323907	1
cg21548116	1.46713	1.19046	1.8081	0.000324202	1
cg13069535	0.658497	0.524345	0.82697	0.00032499	1
cg12740518	1.38203	1.15846	1.64875	0.000325987	1
cg22394521	0.652205	0.516564	0.823461	0.000327187	1
cg14938360	1.03604	1.01622	1.05625	0.000327637	1
cg01366670	0.977206	0.964987	0.98958	0.000328736	1
cg14127947	0.982223	0.972651	0.991888	0.000330428	1
cg12793238	0.961545	0.941157	0.982376	0.000335685	1
cg24022402	1.59084	1.23424	2.05045	0.000336821	1
cg07745624	1.02206	1.00994	1.03432	0.000337166	1
cg21194918	1.64064	1.25151	2.15074	0.000338123	1
cg08961294	1.11679	1.05131	1.18634	0.000339745	1
cg23668028	0.977471	0.96536	0.989734	0.000340916	1
cg19092322	0.977862	0.965953	0.989917	0.000342364	1
cg08946854	1.01609	1.00725	1.02501	0.000343578	1
cg14301425	1.03468	1.01554	1.05417	0.000344102	1
cg23956071	1.1499	1.06523	1.2413	0.000344723	1
cg01883843	1.01805	1.00812	1.02808	0.000346298	1
cg24715767	0.965001	0.946346	0.984023	0.000347412	1
cg19597529	0.962204	0.942102	0.982734	0.000347873	1
cg10169763	1.13047	1.05699	1.20906	0.000348313	1
cg02450646	1.25587	1.10842	1.42293	0.0003497	1
cg00334274	0.98767	0.980966	0.99442	0.000356681	1
cg23982678	0.910452	0.864745	0.958575	0.000357124	1
cg17948627	1.48366	1.19465	1.84258	0.000358489	1
cg03282543	0.969226	0.952729	0.986008	0.000358685	1
cg02415297	1.28128	1.1181	1.46827	0.000362272	1
cg10582827	1.02067	1.00926	1.03221	0.000362608	1
cg12089439	1.04679	1.0208	1.07343	0.000363435	1
cg23641852	1.02189	1.00979	1.03413	0.000366836	1
cg24395016	0.954241	0.929964	0.979151	0.000367525	1
cg20795889	0.958318	0.93613	0.981032	0.000367722	1
cg22772180	0.946757	0.918676	0.975697	0.000368671	1
cg02304614	0.968979	0.952301	0.98595	0.000374731	1
cg25487903	1.31975	1.13262	1.53779	0.000376284	1
cg16658931	1.04099	1.01819	1.06429	0.00037695	1
cg21093166	1.02516	1.01121	1.0393	0.000377194	1
cg23333820	0.9639	0.944556	0.98364	0.000378422	1
cg13386176	1.1024	1.04468	1.1633	0.000380523	1
cg07951135	1.50711	1.20184	1.88992	0.000382317	1
cg18499083	1.0201	1.00896	1.03136	0.000382493	1
cg11653500	1.08962	1.03921	1.14248	0.000383266	1
cg26943708	0.821707	0.737291	0.915788	0.000384444	1
cg13032463	1.01269	1.00566	1.01976	0.000386075	1
cg17578639	0.975615	0.962403	0.989009	0.000387223	1
cg09644558	1.16863	1.07224	1.27369	0.000387923	1
cg01066357	2.59107	1.53106	4.38496	0.000389874	1
cg26741667	1.50134	1.19935	1.87937	0.000390513	1
cg00390511	0.987912	0.981294	0.994575	0.000391145	1
cg24849091	0.979749	0.968723	0.9909	0.000395202	1
cg16488065	0.984924	0.976682	0.993236	0.000395694	1
cg01693108	2.06652	1.38285	3.08818	0.000397907	1
cg12000131	0.982942	0.97362	0.992353	0.000401661	1
cg03032098	1.02312	1.01025	1.03616	0.000402042	1
cg16561487	0.977274	0.964908	0.9898	0.000403369	1
cg12352984	0.864185	0.797051	0.936973	0.000403474	1
cg01515426	1.99839	1.36165	2.93288	0.000404676	1
cg08389686	1.02016	1.00894	1.0315	0.000405859	1
cg04068844	0.977661	0.965493	0.989983	0.000407084	1
cg05848660	1.03195	1.01411	1.0501	0.000407727	1
cg20712263	1.04204	1.01851	1.06611	0.000409828	1
cg07428697	1.44414	1.1777	1.77086	0.000412767	1
cg07439409	0.858083	0.7882	0.934161	0.000413427	1
cg03130103	1.07634	1.03327	1.12121	0.000414676	1
cg15693281	1.07546	1.03289	1.11978	0.000415218	1
cg26768816	1.30594	1.12606	1.51456	0.000415508	1
cg19490609	1.01704	1.00754	1.02663	0.000415609	1
cg18494399	0.982677	0.973184	0.992262	0.000418069	1
cg11531932	0.833331	0.753064	0.922154	0.000418256	1
cg12565502	1.02777	1.01225	1.04354	0.000419724	1
cg27621484	1.04462	1.01955	1.0703	0.000427413	1
cg11207507	1.06848	1.02982	1.10859	0.000427504	1
cg14650601	1.02901	1.01277	1.04551	0.000427573	1
cg18439734	0.875297	0.812772	0.942633	0.0004278	1
cg03591594	1.67981	1.25866	2.24189	0.000428185	1
cg08710739	0.976308	0.963366	0.989423	0.000428603	1
cg08348339	1.07119	1.03096	1.11298	0.000429283	1
cg02061253	0.965012	0.946068	0.984336	0.000430303	1
cg18298494	1.01358	1.006	1.02123	0.000431483	1
cg02849725	0.774567	0.671856	0.89298	0.000432452	1
cg05647208	0.851192	0.778137	0.931105	0.000433021	1
cg11605771	1.58964	1.22793	2.05791	0.000433658	1
cg26333652	1.01274	1.00562	1.01992	0.000437515	1
cg16793129	1.45882	1.18191	1.8006	0.000437751	1
cg13552650	1.92216	1.33515	2.76727	0.000440494	1
cg14969119	1.60312	1.23214	2.08581	0.000440627	1
cg26112755	1.14968	1.06361	1.24273	0.000443025	1
cg19785773	0.970423	0.9543	0.986818	0.000444075	1
cg03915432	1.01307	1.00575	1.02044	0.000444727	1
cg25871843	0.620447	0.47528	0.809952	0.000448221	1
cg21834966	1.34685	1.14047	1.59057	0.000449954	1
cg18505959	1.05304	1.02307	1.08387	0.000450087	1
cg17733447	0.978723	0.967034	0.990553	0.000450868	1
cg15690822	1.04246	1.01852	1.06696	0.000451981	1
cg22487912	1.02002	1.00878	1.03138	0.000452618	1
cg00340382	0.967536	0.949851	0.985549	0.000453828	1
cg13959152	1.87949	1.32077	2.67457	0.000455539	1
cg08190400	1.82802	1.30463	2.56138	0.000456483	1
cg21633795	1.11513	1.04919	1.18522	0.000458308	1
cg20820438	1.59528	1.22841	2.07173	0.000460311	1
cg26673784	0.982744	0.973213	0.992368	0.000463911	1
cg21861192	0.963445	0.943557	0.983753	0.000466943	1
cg04935521	0.974853	0.961043	0.988861	0.000467232	1
cg23766305	0.826792	0.743228	0.919752	0.000467525	1
cg19823649	0.979306	0.967899	0.990847	0.000468405	1
cg11623861	1.04464	1.01938	1.07053	0.000470643	1
cg08204280	1.02655	1.01158	1.04174	0.000471144	1
cg00514353	0.934869	0.900209	0.970864	0.000475904	1
cg06712204	0.976446	0.963473	0.989593	0.000477706	1
cg05036502	1.08054	1.03457	1.12856	0.000479723	1
cg17104700	0.977937	0.965765	0.990262	0.00048075	1
cg14462928	0.403632	0.242524	0.671762	0.000481708	1
cg07287078	0.982243	0.972408	0.992177	0.000483571	1
cg25129480	1.32043	1.12957	1.54354	0.00048383	1
cg10092499	1.05069	1.02188	1.08032	0.000491427	1
cg03366574	0.900523	0.848967	0.955211	0.000495184	1
cg06313381	1.60233	1.22892	2.08921	0.000496381	1
cg20935317	1.08156	1.03487	1.13035	0.000496469	1
cg11546709	1.02349	1.0102	1.03695	0.000497406	1
cg26158235	1.33637	1.13507	1.57337	0.000499689	1
cg08615333	1.01111	1.00484	1.01742	0.000499868	1
cg04807512	1.06565	1.02817	1.10449	0.00050057	1
cg19317871	0.852491	0.779205	0.93267	0.000501764	1
cg05103957	1.45158	1.17671	1.79066	0.000503027	1
cg10772621	1.02384	1.01034	1.03752	0.000503885	1
cg06688362	1.81715	1.29766	2.5446	0.000507624	1
cg02589576	0.973354	0.958639	0.988295	0.000511172	1
cg02775617	0.945753	0.916458	0.975984	0.000512449	1
cg09696421	0.985842	0.977943	0.993804	0.000512459	1
cg22806229	1.04187	1.01804	1.06626	0.000512469	1
cg14079702	0.979201	0.967659	0.990882	0.000512793	1
cg10467371	1.01519	1.00659	1.02386	0.000515029	1
cg09181500	0.978315	0.966285	0.990495	0.000515164	1
cg20698680	1.01502	1.00651	1.02359	0.000515774	1
cg12743894	0.562445	0.406426	0.778357	0.000517431	1
cg15324453	0.635693	0.492155	0.821094	0.000521263	1
cg10057218	0.965013	0.945791	0.984625	0.000521738	1
cg23287485	0.966566	0.948174	0.985314	0.000521773	1
cg23819145	0.98718	0.980009	0.994404	0.000523235	1
cg11353035	0.985502	0.977401	0.99367	0.000524534	1
cg17755321	0.971079	0.955105	0.987321	0.000524849	1
cg13868165	1.18383	1.07611	1.30232	0.000526288	1
cg22269291	1.12264	1.05157	1.19851	0.000526423	1
cg15310387	0.908822	0.861003	0.959297	0.000526719	1
cg08784091	1.03214	1.01384	1.05076	0.000527	1
cg17015937	1.74922	1.27506	2.39972	0.000527771	1
cg14106420	0.982491	0.972726	0.992354	0.000528118	1
cg02241358	2.51213	1.49193	4.22995	0.000530567	1
cg14640736	0.825071	0.73997	0.919959	0.000536141	1
cg11308396	1.02501	1.01078	1.03945	0.000536455	1
cg20012366	0.963553	0.943506	0.984025	0.000537616	1
cg19072037	0.370589	0.211235	0.650156	0.000537864	1
cg02240876	0.978128	0.965953	0.990456	0.000539048	1
cg15018486	1.12428	1.05206	1.20146	0.000544265	1
cg13566436	1.02666	1.01146	1.04209	0.000545213	1
cg00374927	0.254078	0.11684	0.552509	0.000546551	1
cg18318818	0.965312	0.94618	0.984831	0.000547231	1
cg16109953	1.77581	1.28219	2.45946	0.000548619	1
cg26894259	0.923565	0.882827	0.966183	0.000551075	1
cg00608467	1.6621	1.2458	2.21753	0.000552238	1
cg09897639	0.9271	0.888119	0.967792	0.000552916	1
cg03634479	1.03078	1.0132	1.04867	0.000553396	1
cg14239494	1.02919	1.01252	1.04613	0.000553488	1
cg26376157	0.908527	0.860367	0.959383	0.000556269	1
cg17197519	0.961541	0.940364	0.983195	0.000557477	1
cg19200140	0.988311	0.981733	0.994933	0.000558392	1
cg01644623	0.484424	0.320928	0.731211	0.000560265	1
cg26528668	0.930584	0.893316	0.969406	0.000560665	1
cg15947487	0.97317	0.958248	0.988325	0.0005617	1
cg11635524	0.865031	0.796619	0.939318	0.000562262	1
cg14870673	1.31968	1.12723	1.54499	0.000562529	1
cg26283170	1.02598	1.01113	1.04104	0.000562616	1
cg08699270	0.980248	0.969192	0.991429	0.000566184	1
cg27462405	1.11727	1.049	1.18997	0.000566235	1
cg00027990	0.968662	0.951284	0.986358	0.000566615	1
cg12840261	1.53867	1.20427	1.96592	0.000567478	1
cg13679837	1.3203	1.12733	1.5463	0.000567488	1
cg17352157	1.06645	1.02814	1.10619	0.0005678	1
cg12946880	1.43961	1.17012	1.77116	0.000569742	1
cg19857151	0.929454	0.891566	0.968953	0.000570512	1
cg15063465	1.03564	1.01521	1.05648	0.000570601	1
cg26396357	1.0122	1.00524	1.0192	0.000571503	1
cg05659242	1.03203	1.01368	1.05072	0.000573832	1
cg22524735	1.10232	1.04286	1.16517	0.000574869	1
cg06153386	1.03375	1.0144	1.05347	0.000576033	1
cg24899806	1.02145	1.00918	1.03388	0.000578026	1
cg17433018	1.0445	1.01892	1.07073	0.000578843	1
cg21477985	0.982554	0.972753	0.992455	0.000580424	1
cg12084869	1.05569	1.02359	1.0888	0.000582218	1
cg26143413	0.967117	0.948863	0.985721	0.000583086	1
cg19679633	1.03051	1.01301	1.04832	0.000584441	1
cg04020211	1.05453	1.0231	1.08694	0.00058473	1
cg09151131	0.978434	0.966346	0.990674	0.000587723	1
cg07220922	0.98106	0.970419	0.991817	0.000588838	1
cg15601682	0.985407	0.97718	0.993704	0.000589255	1
cg04588455	0.845265	0.767939	0.930378	0.000594297	1
cg18238734	0.839189	0.759275	0.927514	0.000595349	1
cg06233473	0.746857	0.632234	0.88226	0.000595709	1
cg14319655	1.2904	1.11562	1.49256	0.000596199	1
cg20140908	0.916099	0.87139	0.963102	0.000597693	1
cg19653345	0.987166	0.979911	0.994474	0.000597938	1
cg15818715	0.988329	0.981725	0.994977	0.000598568	1
cg14369273	1.20059	1.08151	1.33278	0.000602963	1
cg26535805	1.1753	1.07168	1.28894	0.000603503	1
cg17974053	0.943027	0.91194	0.975173	0.000603768	1
cg19464106	1.87018	1.30766	2.67469	0.000605002	1
cg13523528	1.05814	1.02449	1.09289	0.000609148	1
cg19783675	1.78142	1.28023	2.47881	0.000613557	1
cg03453585	0.980183	0.969022	0.991473	0.000613849	1
cg07671036	1.025	1.01062	1.03958	0.000614194	1
cg01184387	0.963045	0.942515	0.984023	0.000615024	1
cg25214966	0.971144	0.954999	0.987562	0.000618838	1
cg14781541	0.826269	0.740723	0.921694	0.000621029	1
cg09089421	1.03009	1.01275	1.04773	0.000621944	1
cg13939664	0.815901	0.726131	0.916768	0.000623472	1
cg14677615	0.978544	0.966457	0.990782	0.000625434	1
cg27068965	1.44744	1.17098	1.78916	0.000627187	1
cg23103235	0.967543	0.949413	0.986019	0.000629121	1
cg14704980	0.991316	0.986371	0.996286	0.000630451	1
cg17023971	1.24032	1.09621	1.40337	0.000631702	1
cg09859091	0.689005	0.556399	0.853214	0.000636705	1
cg05296832	3.64722	1.73538	7.66529	0.000638852	1
cg17759322	1.30644	1.12058	1.52312	0.000640087	1
cg14212870	1.31504	1.12366	1.53902	0.000642541	1
cg01352906	0.973394	0.958434	0.988587	0.000643759	1
cg02422812	1.85187	1.29988	2.63826	0.000643975	1
cg22530519	0.976603	0.963413	0.989974	0.000644029	1
cg14876102	0.971727	0.955849	0.987868	0.000644728	1
cg24415565	1.0518	1.02171	1.08278	0.00064829	1
cg15135241	0.970126	0.953363	0.987185	0.000649074	1
cg16868751	1.26693	1.10583	1.4515	0.000650159	1
cg06335889	0.657516	0.516672	0.836755	0.000651961	1
cg27559870	0.943102	0.911868	0.975407	0.00065197	1
cg18887839	0.952671	0.926476	0.979607	0.000653557	1
cg13888965	1.22319	1.08937	1.37345	0.00065444	1
cg15233131	0.97335	0.95834	0.988596	0.000658055	1
cg20363192	0.970484	0.953891	0.987366	0.000661599	1
cg08944961	0.989197	0.983031	0.995401	0.000661937	1
cg08217589	0.95063	0.923314	0.978754	0.00066502	1
cg05794480	1.07396	1.03072	1.11901	0.000665932	1
cg21806592	0.991038	0.985911	0.996191	0.000668895	1
cg07274307	1.10354	1.04264	1.16799	0.000669225	1
cg13363689	1.21852	1.08732	1.36555	0.000673413	1
cg21029904	1.08503	1.03517	1.1373	0.000674503	1
cg26004221	0.976143	0.962647	0.989827	0.000675248	1
cg05791356	1.0637	1.02649	1.10225	0.000676728	1
cg11175836	1.01462	1.00616	1.02316	0.000677271	1
cg00827893	1.0142	1.00599	1.02248	0.000677586	1
cg03127174	1.02654	1.01115	1.04217	0.000677973	1
cg20524216	1.64285	1.23378	2.18754	0.000679008	1
cg08230118	0.753187	0.639555	0.887009	0.000681495	1
cg25791973	1.02466	1.01036	1.03917	0.000683117	1
cg11911128	0.973433	0.958421	0.988681	0.000685263	1
cg08724371	0.94363	0.912537	0.975782	0.000688504	1
cg05797295	0.740811	0.622971	0.880941	0.000688592	1
cg07260333	0.971887	0.956014	0.988023	0.000688622	1
cg24522654	0.974436	0.959968	0.989122	0.00069102	1
cg04173139	1.16739	1.06755	1.27657	0.000691284	1
cg08884363	0.97745	0.964655	0.990415	0.000692453	1
cg02315597	1.04435	1.01849	1.07086	0.0006932	1
cg15062281	2.22467	1.40152	3.53127	0.00069421	1
cg08491681	1.01546	1.00649	1.0245	0.000697272	1
cg10612617	0.972147	0.9564	0.988153	0.000697974	1
cg04270489	0.989112	0.982872	0.995392	0.000698644	1
cg25971741	1.01938	1.00813	1.03075	0.000699454	1
cg14037769	1.01407	1.00591	1.02229	0.000699624	1
cg21533997	0.984563	0.975746	0.99346	0.000699921	1
cg25119073	1.09849	1.04041	1.15981	0.000700406	1
cg20240757	1.01397	1.00587	1.02214	0.0007008	1
cg14943749	1.08384	1.03453	1.1355	0.000701417	1
cg22347686	1.0213	1.00892	1.03383	0.000703457	1
cg13918613	1.03968	1.01654	1.06336	0.000704909	1
cg07454803	1.03116	1.01302	1.04964	0.000705809	1
cg11636287	1.33898	1.13081	1.58546	0.000709319	1
cg01900364	0.960352	0.938123	0.983107	0.00070966	1
cg25447164	0.966058	0.946937	0.985565	0.000710341	1
cg01930621	1.14632	1.05918	1.24063	0.000711438	1
cg08255187	0.960987	0.939092	0.983392	0.000713802	1
cg21685387	0.970174	0.953307	0.987339	0.000714484	1
cg16308174	1.67	1.24085	2.24757	0.000714605	1
cg02108135	0.981379	0.970751	0.992123	0.000715896	1
cg20091523	1.08285	1.03405	1.13395	0.000716699	1
cg14673936	0.975461	0.961519	0.989605	0.000718019	1
cg26931526	0.968037	0.949977	0.986441	0.000723029	1
cg02360676	0.973988	0.959217	0.988985	0.000723433	1
cg04082274	0.894483	0.838455	0.954254	0.00072811	1
cg16125816	1.06207	1.02559	1.09984	0.000733615	1
cg04148089	1.01227	1.00513	1.01946	0.000735461	1
cg17010769	1.29332	1.1139	1.50165	0.000736625	1
cg14151682	0.570634	0.411989	0.790368	0.000736975	1
cg05653385	0.983851	0.974592	0.993199	0.00073942	1
cg19603134	0.987014	0.979549	0.994536	0.000739872	1
cg25016865	1.66949	1.23952	2.24861	0.000743034	1
cg25178798	0.788674	0.68701	0.905382	0.000747194	1
cg09283223	1.01114	1.00465	1.01767	0.000748014	1
cg21807215	0.975917	0.962184	0.989847	0.000748447	1
cg20696478	1.0232	1.00964	1.03694	0.00075214	1
cg26134913	1.06038	1.02482	1.09718	0.00075551	1
cg05197164	1.06691	1.02745	1.10789	0.000755585	1
cg07375883	0.877834	0.81374	0.946976	0.000756115	1
cg14582970	0.954699	0.929289	0.980803	0.000756394	1
cg01000469	2.52059	1.47165	4.31716	0.000759026	1
cg06073449	1.01477	1.00614	1.02346	0.000761006	1
cg23312086	1.01037	1.00432	1.01645	0.000761214	1
cg21046078	0.647487	0.502725	0.833934	0.000761295	1
cg07821197	1.36419	1.13849	1.63464	0.00076406	1
cg12804544	1.44512	1.16616	1.79081	0.000766393	1
cg05391423	0.685238	0.549803	0.854034	0.000767276	1
cg06022113	1.04989	1.02053	1.0801	0.000768339	1
cg00292662	0.893663	0.837001	0.954161	0.000768365	1
cg26982279	1.02025	1.0084	1.03224	0.000772902	1
cg13178487	0.87104	0.803647	0.944084	0.00077821	1
cg19927508	1.01627	1.00675	1.02588	0.000780237	1
cg00529757	0.961262	0.939359	0.983676	0.000780874	1
cg16885608	1.66374	1.23593	2.23964	0.000788885	1
cg18165196	0.965516	0.945931	0.985507	0.0007902	1
cg04425820	1.09537	1.03862	1.15522	0.000791025	1
cg07618730	1.34214	1.13013	1.59393	0.000795317	1
cg00642749	1.03074	1.01266	1.04915	0.000800518	1
cg03028529	0.976298	0.962693	0.990095	0.000807581	1
cg02162605	0.979113	0.96709	0.991285	0.000812242	1
cg07898573	0.964936	0.944985	0.985308	0.000812492	1
cg05360714	0.979699	0.968006	0.991533	0.000814433	1
cg00783905	1.83138	1.28508	2.60992	0.000814906	1
cg12349683	0.679201	0.541546	0.851847	0.000815225	1
cg09977852	1.12133	1.04857	1.19913	0.000821039	1
cg20685352	0.822486	0.733507	0.922258	0.000821759	1
cg26564768	0.972294	0.956414	0.988437	0.000825102	1
cg17453456	0.980548	0.969321	0.991905	0.000827932	1
cg23215333	2.36517	1.42786	3.91776	0.000828053	1
cg03989569	1.86474	1.29407	2.68708	0.00082886	1
cg27314249	0.961512	0.939636	0.983897	0.000830291	1
cg04145681	1.00737	1.00304	1.01172	0.000831211	1
cg18090197	0.981243	0.970408	0.9922	0.000831399	1
cg09507386	0.975535	0.96146	0.989816	0.00083637	1
cg26193744	0.704556	0.573683	0.865283	0.000837496	1
cg22153116	1.52152	1.18933	1.94649	0.000838842	1
cg10507582	0.935649	0.899828	0.972896	0.000838957	1
cg03570006	1.0575	1.02336	1.09277	0.000839747	1
cg15986469	0.961492	0.93958	0.983915	0.000841964	1
cg02201774	1.03041	1.01245	1.04869	0.000842378	1
cg04888241	1.03004	1.0123	1.04809	0.000842811	1
cg16072884	1.02406	1.00986	1.03845	0.000843581	1
cg11189139	2.37213	1.42834	3.93955	0.000845566	1
cg14508093	0.981831	0.971315	0.992462	0.000846402	1
cg23250185	1.03616	1.01477	1.058	0.000846975	1
cg05979264	0.971457	0.95507	0.988125	0.000849011	1
cg21597152	0.978381	0.965892	0.99103	0.00085414	1
cg12269394	0.961931	0.940224	0.984138	0.000859269	1
cg24051350	1.02771	1.01132	1.04436	0.000859331	1
cg15538070	1.03197	1.01304	1.05125	0.000864017	1
cg26198776	0.76489	0.653306	0.895532	0.000864066	1
cg21721155	1.89789	1.30183	2.76686	0.000864205	1
cg09998591	1.02654	1.01084	1.04249	0.000864866	1
cg03065476	1.02252	1.00921	1.03601	0.000865016	1
cg14221039	0.914265	0.867294	0.963781	0.000865731	1
cg22434409	1.01256	1.00515	1.02002	0.000865877	1
cg12288758	1.15945	1.06272	1.26498	0.000872444	1
cg06218124	1.58867	1.20962	2.08652	0.000873953	1
cg22570053	1.72372	1.25082	2.37541	0.000875316	1
cg06237697	0.978046	0.965341	0.990917	0.000875498	1
cg25423732	0.923804	0.881672	0.96795	0.000875677	1
cg19732566	1.04931	1.01998	1.07948	0.000875831	1
cg13272839	2.35566	1.4221	3.90209	0.000876379	1
cg20219100	0.93695	0.901689	0.973591	0.00087653	1
cg26639985	0.979243	0.967218	0.991417	0.000877033	1
cg14159747	1.01852	1.00757	1.02958	0.000878256	1
cg11884778	0.983726	0.974262	0.993282	0.000878904	1
cg18099844	1.06258	1.02525	1.10126	0.00087974	1
cg03179429	1.21848	1.08455	1.36895	0.000880399	1
cg22924060	0.982988	0.9731	0.992977	0.000880621	1
cg23022053	1.007	1.00287	1.01115	0.00088336	1
cg10968649	0.701111	0.56871	0.864337	0.000883398	1
cg11467381	0.948994	0.920155	0.978738	0.000884584	1
cg17873451	1.16582	1.06501	1.27618	0.00088489	1
cg03622831	4.94847	1.92776	12.7025	0.000885557	1
cg26955383	0.980283	0.968841	0.99186	0.000886105	1
cg10984852	1.29214	1.11086	1.503	0.00089027	1
cg25192902	1.40485	1.14959	1.7168	0.000892127	1
cg05548349	0.96072	0.938275	0.983701	0.000892423	1
cg27308166	0.634957	0.48569	0.830099	0.000894263	1
cg24449091	0.980082	0.968515	0.991786	0.000894941	1
cg22717607	1.29097	1.11037	1.50095	0.000895244	1
cg08886973	1.02038	1.0083	1.03261	0.000896761	1
cg10518264	0.988825	0.982286	0.995407	0.000899906	1
cg18566819	1.03026	1.01229	1.04855	0.000900329	1
cg01359809	0.968539	0.950432	0.986992	0.000900861	1
cg00037072	1.44122	1.16149	1.78832	0.000901145	1
cg20110707	0.973307	0.957883	0.98898	0.000901599	1
cg00364287	1.01503	1.00613	1.024	0.000902105	1
cg02879960	0.979677	0.967866	0.991632	0.000906822	1
cg15004702	1.38475	1.14251	1.67835	0.000906963	1
cg16367989	1.08252	1.03298	1.13444	0.000908128	1
cg17082026	1.01774	1.00722	1.02837	0.000910612	1
cg09449449	1.13876	1.05459	1.22965	0.00091165	1
cg24727561	1.02538	1.0103	1.04068	0.000913011	1
cg04863703	1.05951	1.02392	1.09633	0.000913357	1
cg14497673	0.66433	0.521664	0.846014	0.00091433	1
cg19160975	1.32712	1.12264	1.56885	0.000916557	1
cg17244466	2.92769	1.5512	5.52563	0.000917563	1
cg20054385	0.980268	0.968784	0.991889	0.000918674	1
cg04238303	0.978975	0.966749	0.991355	0.000919443	1
cg03149958	0.988411	0.981621	0.995249	0.000919715	1
cg10425624	1.02619	1.01061	1.042	0.000923446	1
cg18825221	0.985948	0.977726	0.994239	0.000926029	1
cg14837817	0.835836	0.751683	0.929411	0.000926217	1
cg21464975	1.01966	1.00798	1.03147	0.00092627	1
cg07399960	0.970219	0.953014	0.987734	0.000926534	1
cg22586603	0.987157	0.979634	0.994737	0.000926809	1
cg02371040	1.05308	1.02133	1.08582	0.000929886	1
cg00910333	1.95299	1.31402	2.90268	0.00093062	1
cg03426451	1.55666	1.19788	2.02291	0.000930711	1
cg21546155	0.986955	0.979313	0.994658	0.000931106	1
cg00351804	0.976641	0.96307	0.990404	0.000931276	1
cg13209335	0.973515	0.958166	0.989111	0.000932213	1
cg20211779	0.917311	0.871605	0.965414	0.000933862	1
cg01203331	1.04067	1.01639	1.06552	0.000934397	1
cg25094921	0.921975	0.878665	0.967421	0.000935713	1
cg04762347	1.53535	1.19098	1.9793	0.000937287	1
cg13437635	0.917609	0.872031	0.965569	0.000940031	1
cg08690379	1.19132	1.07393	1.32154	0.000941363	1
cg02414618	1.33821	1.12602	1.59039	0.000941826	1
cg14947411	0.972671	0.956825	0.988779	0.000944685	1
cg08220598	1.06461	1.02582	1.10487	0.000944814	1
cg08594218	1.01175	1.00477	1.01878	0.000946099	1
cg03759454	0.984636	0.975638	0.993716	0.000947003	1
cg25810484	0.986786	0.979034	0.994599	0.000947304	1
cg19744936	0.990181	0.984405	0.995992	0.000948198	1
cg09390974	1.62415	1.21819	2.16538	0.00094993	1
cg12440566	1.49258	1.177	1.89278	0.000950924	1
cg03324101	0.973349	0.957878	0.989069	0.000951635	1
cg11877467	1.01794	1.00726	1.02873	0.000951867	1
cg06885652	1.13729	1.05373	1.22747	0.000952359	1
cg21016855	0.989623	0.983518	0.995767	0.000954622	1
cg20247380	0.850635	0.772777	0.936337	0.000956374	1
cg19144701	1.07133	1.02841	1.11605	0.000957535	1
cg00615941	0.97651	0.962832	0.990383	0.000957624	1
cg00384205	1.01606	1.00649	1.02571	0.000959861	1
cg14609960	1.07544	1.03	1.12288	0.000961176	1
cg01619509	0.97486	0.960231	0.989711	0.000964616	1
cg23067810	1.03963	1.01591	1.06389	0.000964635	1
cg08911208	0.974557	0.959755	0.989586	0.00096483	1
cg15402232	0.981231	0.970252	0.992334	0.000965112	1
cg13209739	1.01771	1.00715	1.02838	0.000967174	1
cg06572031	0.981905	0.971313	0.992613	0.000967793	1
cg11989421	0.977424	0.964256	0.990772	0.000968142	1
cg14136260	0.981611	0.970848	0.992493	0.000968288	1
cg19419497	1.16196	1.06283	1.27034	0.000969949	1
cg14291225	1.05751	1.02296	1.09323	0.000970293	1
cg14162120	1.05904	1.02355	1.09575	0.00097233	1
cg21341878	1.14199	1.05531	1.23579	0.000978879	1
cg04911739	0.961215	0.938871	0.98409	0.000978948	1
cg13910484	1.54215	1.19197	1.99521	0.000979933	1
cg16165450	0.971356	0.954715	0.988288	0.000980229	1
cg14835062	0.756525	0.640838	0.893095	0.000983414	1
cg11211486	0.937287	0.901867	0.974098	0.000983524	1
cg11059971	1.01614	1.00651	1.02586	0.000983658	1
cg12440258	1.0103	1.00416	1.01648	0.000986721	1
cg15908081	1.24249	1.09191	1.41384	0.000987713	1
cg21364719	1.02964	1.0119	1.04769	0.000989146	1
cg26763365	1.12937	1.05049	1.21418	0.000990439	1
cg11459714	1.05172	1.02062	1.08376	0.000993281	1
cg17220116	1.04293	1.01715	1.06936	0.00099596	1
cg25314111	1.17502	1.06742	1.29348	0.000997369	1
cg13407881	0.645793	0.497718	0.837923	0.000999467	1
cg26437845	0.981394	0.970475	0.992436	0.00100196	1
cg21008040	0.980745	0.969451	0.992171	0.00100197	1
cg04289131	1.39581	1.14424	1.70269	0.00100628	1
cg05051152	0.71304	0.582872	0.872277	0.00100665	1
cg19951297	1.03556	1.01422	1.05736	0.00100827	1
cg01850202	1.02429	1.00974	1.03905	0.00100862	1
cg20040765	0.982159	0.971673	0.992757	0.00101153	1
cg01675596	1.01184	1.00476	1.01897	0.00101159	1
cg12586594	1.02091	1.00839	1.03358	0.00101179	1
cg14965979	1.1532	1.05923	1.25549	0.00101274	1
cg03454017	0.98693	0.979217	0.994703	0.0010139	1
cg16728604	1.01681	1.00675	1.02697	0.00101401	1
cg17180607	1.31214	1.11583	1.543	0.00101845	1
cg19459804	0.860674	0.786983	0.941266	0.00101852	1
cg08872550	0.911989	0.863216	0.963519	0.0010192	1
cg08263361	0.863427	0.790999	0.942488	0.00101977	1
cg13001538	1.36461	1.13358	1.64274	0.00102076	1
cg10487904	0.958192	0.934082	0.982924	0.00102136	1
cg14453978	1.12166	1.04738	1.20121	0.00102266	1
cg21898343	1.14077	1.05451	1.23409	0.00102774	1
cg23148546	1.01329	1.00533	1.0213	0.00102856	1
cg27650089	0.860892	0.787239	0.941437	0.00102908	1
cg02557934	1.4236	1.15291	1.75785	0.00102972	1
cg01348970	0.984881	0.975961	0.993883	0.00103118	1
cg04585787	0.983869	0.974359	0.993471	0.00103128	1
cg09437327	1.01766	1.00708	1.02836	0.00103163	1
cg02764370	1.70707	1.24032	2.34948	0.00103265	1
cg08562543	0.587578	0.42769	0.807239	0.00103298	1
cg14177914	0.985228	0.976509	0.994025	0.00103325	1
cg06716437	1.02216	1.00886	1.03563	0.00103483	1
cg19035457	0.962173	0.940262	0.984596	0.00103511	1
cg00301239	0.978787	0.966329	0.991406	0.00103605	1
cg27294816	1.02363	1.00945	1.03802	0.00103704	1
cg23344321	1.05256	1.02082	1.08528	0.00104006	1
cg18762252	1.20855	1.07919	1.35341	0.00104035	1
cg11253957	0.956621	0.931584	0.982329	0.00104699	1
cg03574723	1.01545	1.00618	1.0248	0.00104768	1
cg20367072	1.09669	1.03779	1.15892	0.00104863	1
cg19863426	0.977147	0.963728	0.990754	0.00105091	1
cg25408950	0.982246	0.971775	0.992829	0.00105273	1
cg14150999	0.959381	0.935865	0.983487	0.00105675	1
cg08565675	0.909333	0.859041	0.96257	0.00105986	1
cg07111678	0.397849	0.229127	0.690813	0.00106114	1
cg11111696	1.23071	1.08687	1.39359	0.00106231	1
cg09818632	0.965073	0.944742	0.985842	0.00106581	1
cg20704635	1.11939	1.04627	1.19762	0.00106657	1
cg02389067	1.35832	1.13063	1.63187	0.00106995	1
cg02926368	1.49797	1.17584	1.90835	0.00107087	1
cg07498415	0.986639	0.978719	0.994623	0.0010715	1
cg03121508	1.00934	1.00373	1.01497	0.00107194	1
cg27061489	1.03839	1.0152	1.06211	0.00107728	1
cg05173159	0.951228	0.923138	0.980172	0.00107739	1
cg23467443	1.34382	1.12564	1.60429	0.00107809	1
cg01988129	1.01491	1.00594	1.02395	0.00107842	1
cg21402035	0.97704	0.963529	0.990741	0.00107853	1
cg15730464	0.984508	0.975334	0.993769	0.00108096	1
cg01000408	0.92534	0.883269	0.969414	0.00108156	1
cg12035532	1.05388	1.02122	1.08757	0.00108368	1
cg14962616	0.978341	0.965576	0.991275	0.00108417	1
cg00672332	0.964988	0.944573	0.985845	0.00108818	1
cg16808036	1.20812	1.07856	1.35324	0.00108845	1
cg10953508	1.41282	1.14822	1.73841	0.00108995	1
cg06869454	0.984114	0.974702	0.993617	0.001091	1
cg00486101	1.62809	1.21509	2.18147	0.00109474	1
cg16705464	0.677341	0.536069	0.855843	0.00109729	1
cg20355657	1.34741	1.12651	1.61162	0.00109889	1
cg17680823	1.0932	1.03623	1.15329	0.00110103	1
cg00699901	1.04087	1.01612	1.06621	0.0011019	1
cg18791823	0.931187	0.892143	0.971939	0.00110497	1
cg00127167	1.01986	1.00788	1.03198	0.00110685	1
cg00767886	0.970059	0.952498	0.987943	0.00110888	1
cg01869661	2.07916	1.33916	3.22808	0.00110984	1
cg20729891	2.0051	1.31991	3.04599	0.00111006	1
cg22969669	1.59827	1.20573	2.11861	0.00111024	1
cg23410501	0.978084	0.965143	0.991198	0.00111059	1
cg15253243	1.70937	1.23844	2.35936	0.00111182	1
cg03859915	0.932658	0.89438	0.972574	0.00111183	1
cg05934755	1.23371	1.08739	1.39973	0.00111203	1
cg11834956	0.883598	0.820246	0.951844	0.00111345	1
cg01024792	1.0145	1.00576	1.02331	0.00111368	1
cg05772678	0.785036	0.678727	0.907996	0.00111419	1
cg12824502	1.49851	1.17501	1.91107	0.00111512	1
cg19293995	1.49911	1.17519	1.91233	0.00111574	1
cg07066561	0.869085	0.798763	0.945598	0.00111678	1
cg19599972	0.958403	0.934226	0.983205	0.00111713	1
cg26438105	0.984921	0.975962	0.993962	0.00111796	1
cg14840081	1.10283	1.03978	1.16969	0.0011182	1
cg02398191	0.427201	0.256145	0.712492	0.00111861	1
cg17852172	0.931385	0.892402	0.972071	0.00112021	1
cg02929855	0.982831	0.972645	0.993124	0.00112168	1
cg06043500	0.944399	0.912446	0.977472	0.00112434	1
cg22976832	0.986404	0.978312	0.994563	0.00112532	1
cg09278283	1.11234	1.04331	1.18594	0.00112539	1
cg06253058	1.05257	1.02061	1.08553	0.00112543	1
cg24198678	0.876952	0.810328	0.949052	0.00112559	1
cg20538819	1.5401	1.18742	1.99753	0.00113536	1
cg18224436	0.933515	0.895628	0.973005	0.00113594	1
cg00600477	0.974987	0.960226	0.989976	0.00113683	1
cg14450427	1.07947	1.03088	1.13035	0.00113693	1
cg05969063	0.47659	0.304907	0.744943	0.00114582	1
cg12312988	1.04929	1.0193	1.08016	0.0011468	1
cg00597225	1.06391	1.02491	1.10439	0.00114748	1
cg21496408	1.15002	1.05709	1.25111	0.00114837	1
cg19734370	0.975043	0.960297	0.990015	0.00115147	1
cg25141674	1.03103	1.01221	1.05021	0.00115307	1
cg14552260	1.45185	1.15952	1.81789	0.00115344	1
cg24505978	0.799501	0.698548	0.915044	0.00115775	1
cg15909725	1.02314	1.00911	1.03735	0.00115976	1
cg08447324	1.03082	1.01211	1.04987	0.00116126	1
cg15503018	1.02308	1.00909	1.03727	0.00116145	1
cg27116713	1.69807	1.23363	2.33735	0.0011627	1
cg26964704	0.96954	0.951594	0.987825	0.00117456	1
cg19220923	0.979065	0.966631	0.99166	0.00117742	1
cg06518177	0.979755	0.967721	0.991938	0.00117994	1
cg22480555	1.85336	1.27657	2.69076	0.00118029	1
cg25881723	0.78056	0.672025	0.906623	0.00118166	1
cg21242079	0.988459	0.98155	0.995418	0.00118166	1
cg09012708	0.84447	0.762448	0.935315	0.00118394	1
cg20100006	0.974007	0.958621	0.989639	0.00118687	1
cg26255881	1.01474	1.0058	1.02376	0.00118824	1
cg26055950	0.982254	0.971678	0.992946	0.00118836	1
cg22439792	0.981236	0.970061	0.992541	0.00119075	1
cg14572581	1.21217	1.07898	1.3618	0.00119571	1
cg16611234	0.988881	0.982215	0.995593	0.0011972	1
cg23995786	0.766923	0.653169	0.900489	0.00119723	1
cg15955907	1.02926	1.01146	1.04738	0.00119752	1
cg13640690	1.03047	1.01192	1.04936	0.00119904	1
cg20033210	1.53476	1.18429	1.98894	0.00120031	1
cg04499646	1.01931	1.00758	1.03118	0.0012044	1
cg08359336	0.984767	0.975657	0.993962	0.00120679	1
cg13231747	2.10157	1.34041	3.29498	0.00120871	1
cg04958124	1.4596	1.16084	1.83525	0.00121056	1
cg27037648	1.11487	1.04382	1.19076	0.00121082	1
cg12801392	1.46283	1.16175	1.84193	0.00121607	1
cg15417149	1.07664	1.02953	1.1259	0.00121743	1
cg08648367	1.06608	1.02554	1.10823	0.00121886	1
cg27216780	0.982856	0.972611	0.99321	0.00121946	1
cg27308387	0.671564	0.527589	0.85483	0.00122049	1
cg26906998	1.02504	1.00979	1.04052	0.00122107	1
cg17319889	0.980951	0.969583	0.992453	0.00122141	1
cg25573740	2.11498	1.3432	3.3302	0.00122164	1
cg18537071	0.621212	0.4655	0.82901	0.00122213	1
cg15486123	1.01581	1.00619	1.02551	0.00122628	1
cg18118198	0.981336	0.970189	0.992611	0.00122751	1
cg09238483	0.734478	0.609128	0.885624	0.00122874	1
cg18335068	1.0103	1.00404	1.0166	0.00122915	1
cg01914744	1.27402	1.09999	1.47558	0.00123079	1
cg05046026	1.1703	1.06382	1.28744	0.00123283	1
cg04236329	1.20124	1.07479	1.34256	0.00123375	1
cg26306882	1.8097	1.26269	2.59367	0.00123734	1
cg25101869	0.749987	0.629844	0.893047	0.00123847	1
cg16270990	0.988826	0.982106	0.995592	0.00123936	1
cg22629528	1.01487	1.00582	1.024	0.00123998	1
cg15222563	1.17357	1.06493	1.29329	0.00124113	1
cg01357381	1.17654	1.06598	1.29857	0.00124259	1
cg12400881	1.27698	1.10083	1.48133	0.00124518	1
cg22043275	0.913052	0.863992	0.964898	0.0012465	1
cg00175901	0.923663	0.880182	0.969292	0.00124769	1
cg01979157	1.12092	1.04582	1.20141	0.00125385	1
cg09391128	1.46578	1.16193	1.84908	0.00125432	1
cg09795087	0.979112	0.966633	0.991751	0.00125659	1
cg02950621	0.957893	0.933172	0.983269	0.00126112	1
cg20301680	1.18417	1.06853	1.31231	0.00126251	1
cg02782622	0.903797	0.849899	0.961113	0.00126296	1
cg05308645	0.984656	0.975443	0.993955	0.00126357	1
cg21402364	0.978745	0.966043	0.991614	0.00126573	1
cg05098230	1.2186	1.08056	1.37427	0.00126779	1
cg24740325	1.03912	1.01515	1.06366	0.0012688	1
cg25997110	1.02927	1.01137	1.04749	0.00126893	1
cg15571405	1.02024	1.00788	1.03274	0.00127038	1
cg21982420	1.04757	1.01837	1.0776	0.00127158	1
cg12735892	0.757339	0.639542	0.896834	0.00127165	1
cg14522549	1.31295	1.11255	1.54946	0.00127247	1
cg06768019	0.944523	0.91229	0.977894	0.00127399	1
cg15365028	1.06441	1.02475	1.10561	0.00127495	1
cg13137891	0.892705	0.833138	0.956531	0.00127614	1
cg14748682	1.22192	1.08162	1.38043	0.00127882	1
cg09223851	0.961989	0.939565	0.984948	0.00128051	1
cg06830912	1.51372	1.17615	1.94818	0.00128091	1
cg01518279	0.969617	0.951578	0.987998	0.00128128	1
cg00926680	2.13309	1.34506	3.3828	0.00128218	1
cg12244668	1.0203	1.00789	1.03285	0.00128224	1
cg03004985	0.98449	0.975167	0.993902	0.00128252	1
cg13031551	0.977941	0.964752	0.99131	0.00128264	1
cg15442268	1.02589	1.01005	1.04198	0.00128469	1
cg00628211	1.11836	1.04473	1.19717	0.00128475	1
cg12149391	1.4021	1.14134	1.72243	0.00128527	1
cg12477903	1.02758	1.0107	1.04475	0.00128745	1
cg23792592	0.982067	0.971303	0.99295	0.00129012	1
cg00880562	1.01218	1.00474	1.01967	0.00129158	1
cg22587509	0.961422	0.938656	0.984741	0.00129286	1
cg06700146	0.986123	0.977764	0.994553	0.00129337	1
cg05637113	0.975233	0.960447	0.990246	0.00129351	1
cg05765798	1.30284	1.1089	1.53071	0.00129578	1
cg13165212	0.983017	0.97281	0.99333	0.00129711	1
cg17970107	0.915063	0.86688	0.965924	0.00129906	1
cg18494448	0.785306	0.677754	0.909926	0.00129979	1
cg11756777	0.983105	0.972946	0.993369	0.00130242	1
cg24075743	1.05105	1.01963	1.08344	0.00130381	1
cg17270081	0.986518	0.978388	0.994715	0.00130414	1
cg14166131	0.966777	0.947067	0.986897	0.00130418	1
cg17129645	0.932554	0.893689	0.97311	0.00130451	1
cg19084629	1.09415	1.03575	1.15585	0.00130513	1
cg08732879	0.974532	0.959322	0.989982	0.00130687	1
cg13239976	1.28023	1.10119	1.48838	0.0013089	1
cg03186993	0.900292	0.844423	0.959857	0.00131182	1
cg23297413	0.98076	0.969206	0.992451	0.00131215	1
cg05053327	0.803111	0.702576	0.918033	0.00131219	1
cg13580286	0.970397	0.952769	0.98835	0.00131455	1
cg26763542	0.974376	0.959067	0.989929	0.00131469	1
cg01062443	0.983257	0.973181	0.993438	0.00131477	1
cg25426807	1.01079	1.00419	1.01743	0.0013148	1
cg13319042	0.979938	0.967897	0.992129	0.00131557	1
cg27646230	0.973794	0.958145	0.9897	0.0013159	1
cg02910793	1.06035	1.02311	1.09895	0.00131727	1
cg01508386	0.804338	0.70426	0.918637	0.00131914	1
cg04736951	0.98107	0.969695	0.992579	0.00131969	1
cg03602528	1.74136	1.24132	2.44284	0.0013197	1
cg24531520	1.02374	1.00918	1.0385	0.00132105	1
cg24172509	0.985063	0.976054	0.994156	0.00132562	1
cg27524515	0.8829	0.818251	0.952657	0.00132725	1
cg17298489	0.828574	0.738696	0.929387	0.00132734	1
cg01850464	1.28548	1.10268	1.49858	0.00133208	1
cg12966392	1.02025	1.00783	1.03282	0.0013325	1
cg27390207	0.871301	0.80098	0.947796	0.00133327	1
cg00849854	1.01329	1.00515	1.0215	0.0013355	1
cg18011078	1.023	1.00888	1.0373	0.00133638	1
cg11754676	1.36657	1.12919	1.65385	0.00133659	1
cg00562265	1.03525	1.01356	1.05741	0.00134033	1
cg08247612	0.970194	0.952418	0.988302	0.00134091	1
cg17290332	1.57045	1.19164	2.06968	0.00135101	1
cg01875118	0.976566	0.962506	0.990831	0.00135117	1
cg04726800	0.793329	0.688579	0.914014	0.00135352	1
cg04436690	0.962492	0.940243	0.985268	0.00135647	1
cg19770116	0.933704	0.89533	0.973722	0.0013571	1
cg20964065	1.05168	1.01975	1.08461	0.00135878	1
cg21365077	0.540494	0.370907	0.787621	0.00136159	1
cg07537699	0.970015	0.952109	0.988257	0.00136223	1
cg14270346	1.01186	1.00458	1.01919	0.00136508	1
cg06266993	1.02122	1.00817	1.03444	0.00136935	1
cg03172341	1.14501	1.0539	1.244	0.00137005	1
cg09411356	0.977813	0.96447	0.991341	0.00137149	1
cg15034300	0.975881	0.961397	0.990583	0.00137327	1
cg01028869	2.21221	1.36028	3.59767	0.00137385	1
cg24815353	0.907364	0.854909	0.963038	0.00137624	1
cg25902627	0.565542	0.398863	0.801874	0.00137715	1
cg15765813	1.03648	1.01398	1.05948	0.00137768	1
cg02602915	1.07218	1.02736	1.11896	0.00138061	1
cg23402661	0.653451	0.50348	0.848092	0.00138105	1
cg21422622	0.845688	0.763122	0.937187	0.00138563	1
cg10498717	1.55505	1.18635	2.03832	0.00138579	1
cg14930586	0.907646	0.855299	0.963196	0.00138776	1
cg03879251	0.785779	0.67782	0.910932	0.00138823	1
cg07337250	0.981333	0.97006	0.992737	0.00139114	1
cg08337184	0.908804	0.857049	0.963685	0.00139138	1
cg25046651	1.01878	1.00722	1.03047	0.00139403	1
cg18049474	0.968846	0.950221	0.987836	0.00139499	1
cg21607066	1.27031	1.09692	1.47112	0.00139683	1
cg21379800	1.31244	1.11084	1.55064	0.00139704	1
cg02836531	0.855756	0.777774	0.941557	0.00139723	1
cg07484403	1.28267	1.10102	1.49429	0.00139752	1
cg13438549	0.976692	0.962658	0.99093	0.001404	1
cg09721630	1.01846	1.00709	1.02996	0.00140622	1
cg08310866	0.980703	0.969044	0.992503	0.00140722	1
cg13221767	0.969059	0.950542	0.987936	0.00140775	1
cg07696592	1.46799	1.1598	1.85806	0.00140792	1
cg01727408	1.02148	1.00824	1.03489	0.00140817	1
cg14285050	0.981661	0.97057	0.99288	0.00141055	1
cg08538976	1.16129	1.05942	1.27296	0.0014114	1
cg01871428	1.09612	1.03605	1.15966	0.00141384	1
cg04602007	1.0137	1.00526	1.02221	0.00141672	1
cg05125483	1.28455	1.10142	1.49812	0.00141833	1
cg00435834	1.03152	1.01204	1.05138	0.00142082	1
cg16064425	0.983337	0.973237	0.993542	0.00142302	1
cg06640728	0.92127	0.875995	0.968884	0.00142556	1
cg20190552	0.964886	0.943922	0.986316	0.0014258	1
cg07561547	1.05985	1.02266	1.09839	0.00142603	1
cg12695707	1.01828	1.007	1.02968	0.00142884	1
cg15479073	0.726447	0.596882	0.884137	0.00142978	1
cg21114126	1.61677	1.20325	2.17241	0.00143473	1
cg26712428	0.968001	0.948835	0.987555	0.00143596	1
cg00928393	1.25241	1.09052	1.43833	0.00143755	1
cg06623778	0.973587	0.957691	0.989747	0.00143794	1
cg22217463	0.91118	0.860512	0.964831	0.00144012	1
cg03727732	0.980089	0.968036	0.992292	0.00144476	1
cg11164142	1.13632	1.05039	1.22927	0.00144539	1
cg10899637	1.27027	1.09638	1.47173	0.00144764	1
cg03392145	1.79567	1.25245	2.57451	0.0014498	1
cg16586152	1.19715	1.07164	1.33737	0.00145064	1
cg14744050	0.962232	0.939697	0.985307	0.00145181	1
cg09649196	0.881139	0.815109	0.952517	0.00145244	1
cg05826823	0.981909	0.970933	0.99301	0.00145743	1
cg01817521	0.987282	0.979532	0.995094	0.00145764	1
cg26402169	0.976041	0.961574	0.990727	0.00145931	1
cg03827164	1.6932	1.22421	2.34188	0.00146042	1
cg24802244	0.513326	0.340426	0.77404	0.00146134	1
cg22553313	1.74571	1.23853	2.46056	0.00146478	1
cg23268486	0.837377	0.750645	0.93413	0.00146574	1
cg03522216	0.843568	0.759622	0.93679	0.00146816	1
cg11936639	1.03169	1.01205	1.05172	0.00146935	1
cg26873392	1.02357	1.00898	1.03837	0.0014696	1
cg05353868	0.970813	0.953251	0.988697	0.00147047	1
cg04478015	0.979134	0.966492	0.991941	0.00147119	1
cg25995916	1.2867	1.10155	1.50296	0.0014717	1
cg06777812	1.0189	1.00721	1.03073	0.00147283	1
cg07254987	1.01692	1.00646	1.02749	0.00147348	1
cg02977955	0.919206	0.872688	0.968203	0.00147531	1
cg11706540	0.969723	0.951513	0.988281	0.00147913	1
cg04642165	0.985796	0.977138	0.99453	0.00147916	1
cg02076939	1.51675	1.17318	1.96094	0.00147945	1
cg10869879	1.04048	1.01533	1.06625	0.00148085	1
cg25487650	0.976443	0.962194	0.990904	0.00148154	1
cg22305850	1.01094	1.00418	1.01774	0.00148155	1
cg25575065	1.10435	1.03877	1.17407	0.00148381	1
cg24117192	0.96067	0.937184	0.984744	0.00148641	1
cg11807006	0.979356	0.966835	0.99204	0.0014868	1
cg20740024	0.944695	0.912113	0.97844	0.00148769	1
cg00420808	0.94403	0.911059	0.978193	0.00149563	1
cg00253403	0.914273	0.86507	0.966275	0.00149595	1
cg06880365	1.04754	1.01793	1.078	0.00149771	1
cg16249894	2.10215	1.32886	3.32543	0.00149835	1
cg07085815	1.04165	1.01574	1.06823	0.00149921	1
cg09456094	0.769503	0.654576	0.904609	0.00149995	1
cg09278656	0.648427	0.496257	0.847259	0.00150047	1
cg17868307	1.02238	1.0085	1.03644	0.00150193	1
cg14700325	0.976755	0.962673	0.991044	0.00150261	1
cg15943437	0.655001	0.504399	0.850568	0.00150292	1
cg18720285	1.23635	1.08454	1.40942	0.00150333	1
cg06913388	0.718538	0.585875	0.88124	0.00150383	1
cg09157144	0.896582	0.838135	0.959106	0.0015039	1
cg20061654	1.01314	1.005	1.02133	0.00150424	1
cg22462240	0.978517	0.965481	0.991729	0.00150547	1
cg21083556	0.982537	0.971904	0.993286	0.00150606	1
cg09149541	0.954512	0.927458	0.982356	0.00150655	1
cg20235651	1.31759	1.1112	1.56233	0.0015092	1
cg17185810	1.37889	1.13064	1.68165	0.00151222	1
cg25441412	1.47908	1.16128	1.88385	0.00151653	1
cg18462898	0.980727	0.969001	0.992594	0.00151825	1
cg10149337	1.02856	1.01081	1.04662	0.00151848	1
cg21486659	2.01536	1.30689	3.10791	0.00151893	1
cg23328390	3.4837	1.61058	7.53527	0.00152052	1
cg22470850	0.889085	0.826759	0.95611	0.00152283	1
cg26460867	1.89468	1.27629	2.8127	0.00152356	1
cg25543578	1.02513	1.00952	1.04097	0.00152398	1
cg09099476	0.923007	0.878396	0.969883	0.00152538	1
cg00232874	1.12507	1.046	1.21013	0.0015276	1
cg23472379	1.01838	1.00698	1.02992	0.00152816	1
cg13763952	1.08088	1.03012	1.13415	0.00152885	1
cg21463446	1.02947	1.01114	1.04812	0.00152895	1
cg08129583	0.9894	0.982901	0.995942	0.00152914	1
cg13388944	0.748428	0.625626	0.895333	0.00152945	1
cg13224583	0.974561	0.95915	0.990219	0.00153192	1
cg18674234	0.987389	0.979668	0.995171	0.00153237	1
cg06635764	1.01609	1.00611	1.02617	0.00153284	1
cg13145669	1.52295	1.174	1.97563	0.0015343	1
cg18309528	0.678203	0.533359	0.862382	0.00153595	1
cg19107291	0.964898	0.943799	0.986469	0.00153642	1
cg00331096	1.31051	1.10858	1.54922	0.00153828	1
cg25626079	1.13789	1.05047	1.23258	0.0015384	1
cg10865887	0.976876	0.962836	0.991122	0.00153845	1
cg10305780	1.58779	1.19271	2.11374	0.00153926	1
cg23892580	1.45609	1.15399	1.83729	0.00153933	1
cg04239009	2.12564	1.33287	3.38994	0.00154257	1
cg17754783	1.16208	1.0589	1.27532	0.00154364	1
cg18468511	1.0512	1.01921	1.0842	0.00154365	1
cg04274223	3.1339	1.54525	6.35583	0.00154427	1
cg07167632	0.719946	0.587439	0.882342	0.00154476	1
cg24103475	0.970463	0.952618	0.988643	0.00154481	1
cg09448951	0.589149	0.424575	0.817516	0.00154847	1
cg20755651	0.976697	0.962541	0.991061	0.00154878	1
cg17054432	1.17974	1.06497	1.30689	0.00154945	1
cg07204550	1.01569	1.00595	1.02553	0.00155009	1
cg15105359	1.01617	1.00613	1.02632	0.0015505	1
cg26940518	0.955036	0.928211	0.982636	0.00155083	1
cg03804240	0.986848	0.97879	0.994972	0.00155096	1
cg10809166	1.0157	1.00595	1.02555	0.0015512	1
cg24285858	1.0117	1.00444	1.01902	0.00155138	1
cg10252135	0.84804	0.765744	0.93918	0.00155209	1
cg13470735	0.974716	0.959376	0.990302	0.00155632	1
cg21631583	1.7449	1.23589	2.46354	0.00155884	1
cg24436932	0.945651	0.91347	0.978966	0.00155953	1
cg05602439	0.966539	0.946369	0.987139	0.00156192	1
cg10112407	1.03636	1.01367	1.05955	0.00156231	1
cg18943623	1.09469	1.03499	1.15782	0.00156561	1
cg26732720	0.982106	0.971176	0.993159	0.00156616	1
cg23696834	1.07438	1.02764	1.12323	0.00156795	1
cg18082322	2.26974	1.36551	3.77276	0.00156927	1
cg12538950	1.02494	1.00941	1.04072	0.00156999	1
cg13310541	1.26574	1.09366	1.46488	0.00157286	1
cg15625117	1.17521	1.06325	1.29896	0.00157485	1
cg11724085	0.973501	0.95742	0.989851	0.00157615	1
cg00806680	0.95999	0.935985	0.984611	0.00157617	1
cg13702053	1.02598	1.00979	1.04243	0.00157679	1
cg11415932	1.51122	1.16979	1.95232	0.00157695	1
cg00668515	1.0185	1.00698	1.03014	0.00157709	1
cg06417831	1.58686	1.19159	2.11325	0.00158179	1
cg23574752	2.49588	1.41492	4.40266	0.0015858	1
cg15827031	1.02606	1.00981	1.04257	0.00158597	1
cg10878287	0.746827	0.623061	0.895178	0.00158974	1
cg09693508	1.28236	1.09891	1.49644	0.00159228	1
cg04066637	1.02524	1.0095	1.04124	0.00159572	1
cg14136502	1.03477	1.01304	1.05696	0.00159595	1
cg26522297	1.0218	1.00821	1.03558	0.0015972	1
cg14698025	1.02856	1.01073	1.0467	0.00159749	1
cg17364076	2.79725	1.4768	5.29834	0.00159798	1
cg15941948	1.0358	1.01342	1.05868	0.00159962	1
cg08076462	0.832751	0.743277	0.932996	0.00160033	1
cg08676585	1.13963	1.05077	1.23599	0.00160052	1
cg10705394	2.538	1.42319	4.52606	0.00160147	1
cg02081722	0.975139	0.960009	0.990507	0.00160174	1
cg05417087	1.34228	1.1179	1.6117	0.00160964	1
cg02723291	1.01387	1.00523	1.02259	0.00161022	1
cg24002071	0.931788	0.891765	0.973607	0.00161027	1
cg26808810	1.22018	1.07822	1.38082	0.00161399	1
cg13453244	0.977318	0.96348	0.991355	0.0016145	1
cg19693494	0.855206	0.775975	0.942527	0.00161476	1
cg16904599	0.806021	0.704905	0.921642	0.00161569	1
cg25557739	1.03937	1.01471	1.06463	0.00162167	1
cg19758758	1.89143	1.27253	2.81135	0.00162271	1
cg07396407	1.34552	1.11876	1.61825	0.00162341	1
cg11568368	0.895274	0.835737	0.959051	0.00162825	1
cg08228350	0.981143	0.969591	0.992832	0.00163	1
cg21258697	0.539975	0.368013	0.792289	0.00163165	1
cg02112609	0.955642	0.929042	0.983004	0.00163208	1
cg22728904	0.985351	0.976345	0.99444	0.00163233	1
cg00921722	0.77632	0.663156	0.908794	0.0016345	1
cg08264435	1.4105	1.1387	1.74718	0.0016368	1
cg16315740	0.979144	0.966384	0.992072	0.00163692	1
cg21198712	1.01567	1.00589	1.02555	0.00163704	1
cg01805480	0.929463	0.888097	0.972757	0.00163783	1
cg05236768	1.22343	1.07911	1.38705	0.00163935	1
cg15006866	1.02226	1.00834	1.03636	0.00164116	1
cg12307314	0.982093	0.971108	0.993202	0.00164159	1
cg07119404	1.08171	1.03009	1.13592	0.00164181	1
cg12800939	1.17613	1.06312	1.30115	0.00164724	1
cg16184495	0.990721	0.984986	0.99649	0.0016495	1
cg14934253	0.988125	0.980799	0.995505	0.00165134	1
cg15235057	1.21844	1.07736	1.378	0.00165135	1
cg08188330	0.978313	0.965043	0.991766	0.00165247	1
cg00708258	1.11219	1.0409	1.18836	0.00165551	1
cg08914678	0.988122	0.980793	0.995506	0.00165693	1
cg06516769	0.976682	0.962428	0.991147	0.0016579	1
cg12994505	1.04212	1.01567	1.06925	0.001658	1
cg13979581	0.989892	0.983643	0.996181	0.00166584	1
cg14103336	0.972995	0.956527	0.989747	0.00167042	1
cg14930269	0.818558	0.722476	0.927419	0.00167367	1
cg06868481	0.966321	0.945891	0.987192	0.00167653	1
cg22703113	0.979987	0.967706	0.992424	0.00167829	1
cg09600152	1.23626	1.08305	1.41114	0.00167894	1
cg11349187	0.97442	0.958795	0.990301	0.00167981	1
cg03910048	1.6596	1.2099	2.27646	0.00168026	1
cg26876514	1.04949	1.01833	1.08159	0.0016807	1
cg17043722	0.982869	0.97233	0.993523	0.0016813	1
cg26376030	0.971908	0.954781	0.989342	0.00168222	1
cg24059154	1.19951	1.07079	1.34369	0.00168382	1
cg17647273	1.03241	1.01206	1.05316	0.00168472	1
cg20944315	0.984394	0.974779	0.994104	0.00168532	1
cg14621103	2.10411	1.32262	3.34735	0.00168736	1
cg14940405	0.909978	0.857944	0.965168	0.00168899	1
cg11650584	1.06986	1.0257	1.11593	0.00169145	1
cg03304019	0.987684	0.980072	0.995356	0.00169385	1
cg02566611	0.820306	0.724881	0.928293	0.00169402	1
cg24663256	1.01262	1.00472	1.02057	0.00169488	1
cg21618455	0.991008	0.985434	0.996614	0.00169695	1
cg08582801	1.03237	1.01203	1.0531	0.00169722	1
cg04171329	0.464425	0.28767	0.749784	0.00169922	1
cg21935981	1.0109	1.00408	1.01777	0.00169968	1
cg11896271	1.05728	1.02113	1.0947	0.00170025	1
cg04547181	0.990048	0.983881	0.996254	0.00170515	1
cg11759354	1.16185	1.05791	1.276	0.00170572	1
cg20698069	0.857478	0.778939	0.943937	0.00170609	1
cg21765359	0.963609	0.941547	0.986187	0.00170705	1
cg25282454	1.01417	1.00529	1.02313	0.00170744	1
cg04794420	1.05031	1.01858	1.08302	0.0017096	1
cg06747745	0.625626	0.466695	0.838679	0.00170987	1
cg10343442	1.21257	1.07497	1.36778	0.00171056	1
cg10968404	1.30648	1.10544	1.54407	0.00171382	1
cg01918706	1.72692	1.22735	2.42984	0.00171427	1
cg02488653	0.977015	0.962915	0.991321	0.00171718	1
cg26312785	1.87927	1.26675	2.78797	0.00171907	1
cg23796525	0.978684	0.965589	0.991957	0.00171957	1
cg03328107	0.98001	0.967715	0.992461	0.0017199	1
cg25008444	1.0094	1.00351	1.01532	0.00172357	1
cg20095237	0.976874	0.962682	0.991275	0.00172681	1
cg20915447	0.862449	0.786205	0.946086	0.00172705	1
cg00991875	1.00937	1.0035	1.01527	0.00172792	1
cg22773093	0.979628	0.967095	0.992324	0.00173074	1
cg07576376	0.963132	0.940761	0.986035	0.00173109	1
cg25848060	1.55616	1.18001	2.0522	0.00173344	1
cg15972264	1.02036	1.00757	1.03332	0.0017343	1
cg00821483	0.898117	0.839711	0.960586	0.00173592	1
cg19205909	0.987082	0.979084	0.995147	0.00173671	1
cg03314548	1.01543	1.00575	1.02521	0.00173824	1
cg01112899	0.978215	0.964823	0.991794	0.00173867	1
cg16133964	1.20393	1.0719	1.35223	0.00173975	1
cg11584499	1.21581	1.07584	1.37399	0.00174007	1
cg04988917	1.01271	1.00474	1.02076	0.00174268	1
cg04632887	0.976742	0.962458	0.991238	0.00174357	1
cg00710862	0.988073	0.980679	0.995523	0.0017439	1
cg14353516	0.726058	0.594174	0.887214	0.00174792	1
cg25402137	0.980648	0.968722	0.992722	0.00174801	1
cg18621091	1.04234	1.01562	1.06977	0.00174942	1
cg18385190	0.975792	0.960931	0.990884	0.00175085	1
cg03570636	1.02413	1.00895	1.03955	0.0017553	1
cg02190211	1.0183	1.00679	1.02994	0.00176149	1
cg14249564	1.01993	1.0074	1.03263	0.00176295	1
cg08056957	1.04531	1.01668	1.07475	0.00176381	1
cg14438399	1.71862	1.22401	2.41311	0.00176437	1
cg01112674	1.0487	1.0179	1.08043	0.0017687	1
cg25021970	1.0268	1.00991	1.04397	0.00177724	1
cg11857646	0.981925	0.970754	0.993224	0.00178024	1
cg20664061	0.980825	0.968984	0.99281	0.00178225	1
cg13443733	0.983899	0.973931	0.99397	0.00178309	1
cg22225065	0.928103	0.88566	0.972579	0.00178311	1
cg12797070	0.96397	0.942033	0.986419	0.00178312	1
cg08738600	0.816395	0.718832	0.927199	0.00178411	1
cg23922289	0.586046	0.419112	0.81947	0.00178468	1
cg02289339	0.776168	0.662074	0.909924	0.00178658	1
cg22802068	1.44296	1.14633	1.81634	0.00178952	1
cg15167547	1.01615	1.00598	1.02641	0.00179146	1
cg09079580	1.03208	1.01183	1.05275	0.00179236	1
cg15641500	1.04762	1.01747	1.07867	0.00179442	1
cg19845809	0.828412	0.736083	0.932323	0.00179473	1
cg24679905	0.974974	0.959585	0.99061	0.00179533	1
cg13809915	0.98752	0.979765	0.995337	0.00179734	1
cg00455523	1.01272	1.00472	1.02079	0.00179839	1
cg05048159	1.07307	1.02659	1.12166	0.00179935	1
cg27623451	0.99083	0.985115	0.996579	0.00180268	1
cg27002758	1.62017	1.1966	2.19368	0.00180378	1
cg15017226	0.976943	0.96273	0.991367	0.00181155	1
cg16691989	1.58117	1.18566	2.10862	0.0018118	1
cg26134248	1.02301	1.00849	1.03774	0.00181241	1
cg08121890	0.978649	0.965467	0.992011	0.00181263	1
cg06473578	0.96813	0.948626	0.988036	0.00181398	1
cg15569292	1.01003	1.00371	1.01638	0.00181467	1
cg20553782	0.735912	0.606931	0.892304	0.00181488	1
cg12299599	0.982285	0.971314	0.993381	0.00181583	1
cg12030941	0.963995	0.942034	0.986468	0.00181611	1
cg12219045	1.22507	1.07833	1.39177	0.00181765	1
cg26641455	0.952294	0.923481	0.982005	0.00181854	1
cg20126635	1.042	1.0154	1.0693	0.00181971	1
cg01288598	0.89594	0.836141	0.960016	0.00182218	1
cg15403942	0.97766	0.963873	0.991645	0.0018226	1
cg06081306	0.939798	0.903816	0.977213	0.00182584	1
cg21171314	1.04256	1.01559	1.07025	0.00182645	1
cg22249985	1.03662	1.01344	1.06033	0.00182653	1
cg10218733	0.968295	0.948875	0.988112	0.00182765	1
cg14100362	1.0296	1.01089	1.04866	0.00182781	1
cg02505827	1.04137	1.01516	1.06826	0.00182831	1
cg04101340	2.47123	1.39893	4.36546	0.00183127	1
cg16346591	0.912454	0.861361	0.966577	0.0018318	1
cg15012214	1.01803	1.00665	1.02954	0.00183263	1
cg10150871	1.0235	1.00866	1.03856	0.00183329	1
cg00607989	0.982398	0.971484	0.993433	0.00183369	1
cg12019806	0.975753	0.960803	0.990935	0.00183395	1
cg00502932	1.41715	1.13806	1.76467	0.00183509	1
cg18620396	1.29146	1.09952	1.5169	0.00183532	1
cg14856585	0.918297	0.870342	0.968893	0.00184088	1
cg11449935	0.783501	0.671982	0.913528	0.00184286	1
cg03374559	1.30184	1.10272	1.53693	0.001843	1
cg06341370	0.84651	0.762233	0.940104	0.0018436	1
cg23491743	0.983629	0.973464	0.9939	0.00184374	1
cg24282486	3.09825	1.5201	6.31481	0.00185409	1
cg26173447	0.950058	0.919893	0.981213	0.00185831	1
cg10631546	0.983198	0.97276	0.993749	0.00186129	1
cg26922038	0.977314	0.963286	0.991546	0.00186477	1
cg20000994	2.50948	1.40547	4.48071	0.00186622	1
cg03917492	0.969675	0.951041	0.988674	0.00186747	1
cg14484045	1.03874	1.01416	1.06392	0.00186835	1
cg16151494	0.989014	0.982152	0.995924	0.00187207	1
cg05643349	0.726623	0.594144	0.888641	0.00187363	1
cg02252918	1.32048	1.10823	1.57338	0.00187454	1
cg16649771	1.04539	1.01654	1.07506	0.00187571	1
cg25423563	0.964415	0.942634	0.986699	0.0018783	1
cg25246092	1.10118	1.03625	1.17019	0.00188136	1
cg12057946	0.961143	0.937418	0.985468	0.0018844	1
cg25034766	1.01513	1.00556	1.02478	0.00188468	1
cg07759377	1.48786	1.15803	1.91163	0.00188739	1
cg00553120	0.248528	0.103278	0.598058	0.00188776	1
cg26361535	1.01539	1.00565	1.02522	0.00189015	1
cg06686679	0.972672	0.955817	0.989824	0.00189188	1
cg06890779	1.03965	1.01446	1.06547	0.00189205	1
cg16930746	1.01534	1.00564	1.02514	0.0018921	1
cg15219650	1.21796	1.07549	1.37931	0.00189305	1
cg02049682	0.975486	0.960329	0.990882	0.00189354	1
cg25529965	1.11064	1.03948	1.18666	0.00189554	1
cg02837432	0.981645	0.970236	0.993188	0.00189719	1
cg02011404	0.92248	0.876681	0.970671	0.00189842	1
cg04021672	1.01458	1.00535	1.02389	0.00190039	1
cg13598480	0.960453	0.9363	0.985229	0.00190218	1
cg23568998	1.48727	1.15762	1.9108	0.00190421	1
cg24255269	1.02934	1.01072	1.04831	0.0019076	1
cg05253165	0.985382	0.976262	0.994587	0.00190823	1
cg06175025	1.17901	1.06257	1.30821	0.0019106	1
cg11197905	0.983301	0.9729	0.993813	0.00191069	1
cg14338425	1.02508	1.00917	1.04123	0.00191157	1
cg27195914	0.98199	0.970783	0.993326	0.00191318	1
cg11817999	0.951708	0.922417	0.981929	0.0019137	1
cg04986591	0.984832	0.975371	0.994385	0.00191379	1
cg13665008	0.971385	0.953736	0.989361	0.00191439	1
cg06303168	0.986888	0.978695	0.995149	0.00191447	1
cg18864674	0.982999	0.97241	0.993704	0.00191575	1
cg12294026	1.04997	1.01812	1.08281	0.00191627	1
cg21885309	1.05195	1.01883	1.08615	0.00191688	1
cg17839399	1.01405	1.00515	1.02304	0.00191909	1
cg15882566	0.967415	0.947378	0.987876	0.00192043	1
cg20271029	1.02185	1.00799	1.03591	0.00192214	1
cg14866419	1.6348	1.19831	2.23027	0.00192498	1
cg19218607	0.981363	0.969764	0.993101	0.00192714	1
cg18966265	0.943487	0.909428	0.97882	0.0019277	1
cg24058145	1.0113	1.00415	1.01852	0.0019278	1
cg09398185	1.56334	1.17871	2.07348	0.00192798	1
cg18266620	2.29022	1.3564	3.86695	0.00193153	1
cg14266862	1.15157	1.05328	1.25904	0.00193371	1
cg26530971	1.24966	1.08542	1.43875	0.0019341	1
cg10518543	1.08574	1.03071	1.14371	0.00193638	1
cg04161859	0.984996	0.975625	0.994457	0.00193702	1
cg09837298	1.03458	1.01258	1.05706	0.00193737	1
cg00711734	1.45906	1.14899	1.85281	0.00193976	1
cg18755783	1.03089	1.01125	1.05091	0.00193985	1
cg23101910	1.59853	1.18814	2.15067	0.00194309	1
cg23401684	0.980346	0.968115	0.992732	0.00194373	1
cg14993964	1.16832	1.05883	1.28912	0.00194413	1
cg04346459	0.974157	0.958157	0.990425	0.00194435	1
cg07338983	0.612159	0.448781	0.835015	0.00194659	1
cg00787919	0.413398	0.236418	0.722866	0.00194688	1
cg17105014	0.989065	0.982209	0.995969	0.00194754	1
cg16326979	1.24872	1.08501	1.43714	0.00194914	1
cg02183001	1.01449	1.0053	1.02376	0.00195191	1
cg00035398	1.12747	1.04504	1.21641	0.00195418	1
cg05630016	1.0186	1.00679	1.03056	0.00195716	1
cg02862904	1.15516	1.05437	1.26558	0.00195732	1
cg07220085	1.56996	1.17997	2.08883	0.00196258	1
cg17974515	0.979276	0.966378	0.992347	0.00196395	1
cg23169512	0.98643	0.977933	0.995001	0.00196498	1
cg07269724	1.36606	1.12121	1.66438	0.00196675	1
cg26301661	1.57488	1.18125	2.09967	0.00196713	1
cg27513495	0.963344	0.94083	0.986397	0.00196747	1
cg17083475	0.986757	0.978462	0.995123	0.00196843	1
cg10214350	1.76645	1.232	2.53276	0.00196956	1
cg08888249	2.82374	1.46305	5.44993	0.00197337	1
cg02757179	0.970474	0.952224	0.989075	0.00197411	1
cg17479303	0.580365	0.411163	0.819197	0.00197455	1
cg22510462	0.971618	0.954056	0.989503	0.00197521	1
cg07063082	2.25493	1.34718	3.77435	0.0019756	1
cg19571071	1.79059	1.23799	2.58985	0.00197646	1
cg04386206	1.01509	1.0055	1.02477	0.00197856	1
cg19860515	0.987768	0.980095	0.995501	0.00197919	1
cg23516310	0.986657	0.978294	0.995091	0.00198001	1
cg08099381	0.889737	0.826244	0.958109	0.00198243	1
cg08574156	1.39078	1.12842	1.71414	0.00198313	1
cg03507326	0.991103	0.985506	0.996732	0.00198394	1
cg07699608	0.934526	0.895268	0.975505	0.00198452	1
cg12230296	0.72096	0.585933	0.887105	0.00198725	1
cg01807862	0.906878	0.852367	0.964874	0.00199805	1
cg20953388	1.08347	1.02976	1.13998	0.00199916	1
cg18347642	1.0152	1.00553	1.02497	0.00200028	1
cg26439963	0.945808	0.912967	0.979829	0.00200097	1
cg26520976	1.24969	1.08493	1.43946	0.00200118	1
cg05956747	1.28471	1.09594	1.506	0.00200327	1
cg23649280	0.987553	0.979738	0.995431	0.00200395	1
cg16163116	0.940952	0.905312	0.977995	0.00200568	1
cg25724283	1.0239	1.00867	1.03935	0.00200585	1
cg01873637	1.01218	1.00444	1.01999	0.00200843	1
cg12504247	1.02096	1.00761	1.03448	0.00200898	1
cg14592099	0.983814	0.973679	0.994054	0.00200945	1
cg13692001	1.46082	1.14855	1.85798	0.00201024	1
cg01607530	1.01776	1.00645	1.02919	0.00201159	1
cg11820558	2.21371	1.33689	3.66559	0.00201265	1
cg20820543	0.850893	0.768008	0.942723	0.00201528	1
cg01805427	0.97747	0.963432	0.991712	0.00201785	1
cg08402572	0.95933	0.934374	0.984953	0.00201937	1
cg09481234	0.920454	0.873267	0.97019	0.00202143	1
cg00648184	1.02152	1.0078	1.03543	0.00202185	1
cg13383153	1.14741	1.05145	1.25213	0.00202941	1
cg17432748	1.01655	1.00601	1.0272	0.0020309	1
cg26832893	0.718551	0.582474	0.886417	0.00203211	1
cg13120952	1.28172	1.09473	1.50065	0.00203641	1
cg03590668	1.0575	1.0206	1.09574	0.00203686	1
cg03937605	1.10466	1.03696	1.17677	0.002037	1
cg01591470	1.13299	1.04658	1.22654	0.00203702	1
cg12799818	0.984129	0.974176	0.994184	0.00203758	1
cg17174493	0.523111	0.346569	0.789584	0.00203806	1
cg03892041	0.980488	0.968287	0.992843	0.0020407	1
cg10873086	0.978134	0.964487	0.991974	0.00204185	1
cg02114954	0.979192	0.966194	0.992365	0.00204193	1
cg12250062	0.960305	0.935901	0.985346	0.00204277	1
cg10058920	0.978553	0.965162	0.99213	0.00204324	1
cg14400672	1.01824	1.00661	1.03002	0.00204984	1
cg01373705	2.86608	1.46743	5.59784	0.00205058	1
cg26991761	1.02205	1.00798	1.03633	0.00205107	1
cg07689396	0.987446	0.979546	0.995409	0.00205128	1
cg21658291	0.839534	0.751175	0.938288	0.00205211	1
cg01024473	0.945868	0.912981	0.979939	0.0020538	1
cg15826897	0.989794	0.983359	0.996272	0.00205396	1
cg20255094	1.05975	1.02136	1.0996	0.00205472	1
cg07115110	0.973227	0.956574	0.990169	0.00205696	1
cg19494913	1.01657	1.006	1.02726	0.00205754	1
cg25119690	1.06654	1.02373	1.11115	0.00205863	1
cg01678339	0.750434	0.625185	0.900776	0.00205895	1
cg19607474	0.983986	0.973934	0.994143	0.00206163	1
cg03550965	0.906592	0.851768	0.964945	0.00206181	1
cg04334243	1.01146	1.00415	1.01882	0.00206333	1
cg18024801	1.20927	1.07158	1.36466	0.00206387	1
cg01242123	0.979536	0.966736	0.992506	0.00206406	1
cg19826848	0.960983	0.936955	0.985627	0.00206591	1
cg07094853	2.37405	1.36958	4.1152	0.00206632	1
cg03469079	0.566012	0.394059	0.813	0.00206661	1
cg06755263	0.964754	0.942977	0.987033	0.00206708	1
cg04232816	0.975493	0.960212	0.991017	0.00206871	1
cg24207616	1.00791	1.00287	1.01298	0.00207177	1
cg21469772	1.01207	1.00437	1.01983	0.00207336	1
cg19494960	0.902138	0.844898	0.963256	0.00207502	1
cg01465438	3.39199	1.55888	7.38069	0.00207549	1
cg08166513	0.867589	0.792589	0.949686	0.00207649	1
cg16535788	0.95636	0.929579	0.983914	0.00207675	1
cg00898190	0.983896	0.97378	0.994117	0.00207691	1
cg08046751	1.01779	1.00643	1.02928	0.0020796	1
cg18596952	0.689115	0.543672	0.873467	0.00208073	1
cg12904950	1.3448	1.11362	1.62396	0.00208253	1
cg27353073	1.33936	1.11195	1.61328	0.00208583	1
cg24461814	1.08877	1.03137	1.14938	0.00208783	1
cg23867718	1.19147	1.06567	1.33211	0.00208905	1
cg05519582	1.00755	1.00274	1.0124	0.00209083	1
cg14443694	0.497699	0.319108	0.77624	0.00209156	1
cg06459066	0.726822	0.593136	0.890639	0.0020927	1
cg10007222	0.966786	0.946204	0.987816	0.0020942	1
cg04109822	0.977644	0.963661	0.991831	0.0020983	1
cg05865746	0.985568	0.976481	0.99474	0.00209891	1
cg20691120	1.44078	1.14165	1.81829	0.00210027	1
cg08864381	1.97232	1.27938	3.04056	0.00210061	1
cg03050669	0.976763	0.962238	0.991508	0.00210129	1
cg05369582	0.768157	0.649296	0.908776	0.0021033	1
cg02608491	1.1686	1.05813	1.29061	0.00210363	1
cg14287869	0.981174	0.969359	0.993133	0.00210681	1
cg25198049	0.986721	0.978348	0.995165	0.00210722	1
cg09887627	1.14043	1.04877	1.2401	0.00211206	1
cg08519447	0.97143	0.95364	0.989552	0.00211423	1
cg22356527	1.0165	1.00595	1.02716	0.0021148	1
cg18009825	0.603834	0.437734	0.832961	0.00211541	1
cg00621943	0.977717	0.963765	0.99187	0.00211809	1
cg13959088	0.769033	0.650433	0.909258	0.0021185	1
cg12159259	1.02473	1.00888	1.04082	0.00212155	1
cg01618304	1.48294	1.15335	1.9067	0.00212273	1
cg03718528	0.843791	0.757145	0.940352	0.00212296	1
cg24869475	0.695587	0.551797	0.876847	0.00212441	1
cg13654253	0.583458	0.413722	0.82283	0.00212811	1
cg01510990	1.0134	1.00483	1.02205	0.00212826	1
cg03477303	0.981974	0.970643	0.993438	0.00212905	1
cg11802553	1.01423	1.00513	1.02342	0.00212907	1
cg16955407	1.0309	1.01107	1.05111	0.00212955	1
cg04155280	0.968161	0.948374	0.988359	0.00213073	1
cg23274689	0.940925	0.905062	0.978209	0.00213229	1
cg00774435	0.983377	0.972911	0.993954	0.00213462	1
cg01131147	1.17973	1.06158	1.31103	0.00214121	1
cg11361442	0.945828	0.912783	0.980069	0.00214408	1
cg16636114	0.964953	0.943219	0.987188	0.0021455	1
cg05816380	0.915174	0.864811	0.968471	0.00214573	1
cg05729836	0.986576	0.978097	0.995128	0.0021486	1
cg08157300	3.00894	1.48885	6.08103	0.00215014	1
cg21654404	1.10454	1.03657	1.17696	0.00215081	1
cg04166962	0.779421	0.66472	0.913914	0.0021527	1
cg06173857	1.39828	1.12872	1.73223	0.00215424	1
cg15989935	0.982828	0.972013	0.993764	0.00215515	1
cg00438309	0.95221	0.922881	0.982471	0.00215574	1
cg16886895	1.22247	1.07522	1.3899	0.00215921	1
cg24774154	0.889365	0.825164	0.958562	0.00216206	1
cg02155627	1.36198	1.11796	1.65924	0.00216234	1
cg00971332	1.00966	1.00348	1.01589	0.00216611	1
cg17241841	0.983962	0.973844	0.994184	0.00216932	1
cg01852585	1.053	1.01881	1.08835	0.00216963	1
cg26302103	0.546529	0.371424	0.804187	0.00217087	1
cg06392126	1.01803	1.00646	1.02972	0.00217408	1
cg19375530	1.03379	1.01206	1.056	0.00217473	1
cg05705096	1.03975	1.01415	1.06599	0.00217592	1
cg01283685	0.988019	0.980433	0.995664	0.00217716	1
cg04256065	0.968157	0.948327	0.988402	0.00217843	1
cg25263238	1.00973	1.0035	1.016	0.00218033	1
cg25210451	1.04359	1.0155	1.07246	0.00218098	1
cg07594845	1.24934	1.08353	1.44053	0.00218218	1
cg06909248	0.978566	0.965097	0.992223	0.00218362	1
cg17873420	0.561394	0.388038	0.812198	0.00218495	1
cg24836607	1.01922	1.00688	1.0317	0.00218579	1
cg08825817	0.984557	0.974803	0.994409	0.00218638	1
cg09368805	1.68944	1.20793	2.36288	0.00218698	1
cg06181531	1.11301	1.03932	1.19192	0.00218793	1
cg04520401	2.08672	1.30334	3.34094	0.00218965	1
cg18270627	1.52687	1.16466	2.00174	0.00218992	1
cg22933469	0.856067	0.775026	0.945583	0.00219377	1
cg15819853	1.3723	1.12069	1.68041	0.00219441	1
cg00683788	0.98097	0.968982	0.993107	0.00219482	1
cg08270913	1.22678	1.07635	1.39823	0.0021957	1
cg04530976	1.1801	1.06142	1.31205	0.00219674	1
cg08883853	0.981148	0.969268	0.993174	0.00219843	1
cg10064079	1.73649	1.21968	2.47229	0.0022006	1
cg01075463	1.08168	1.02864	1.13745	0.00220567	1
cg24871046	1.04089	1.01452	1.06795	0.00220652	1
cg18426477	0.983951	0.97381	0.994198	0.00220732	1
cg05306134	0.885825	0.819649	0.957343	0.00221034	1
cg13520026	1.27181	1.09029	1.48355	0.00221171	1
cg10376337	0.856944	0.776264	0.946009	0.00221234	1
cg22234630	1.26979	1.08966	1.47969	0.00221304	1
cg02991513	0.948947	0.917624	0.981339	0.0022141	1
cg17812013	1.31896	1.10463	1.57486	0.00221427	1
cg12179044	5.99332	1.90341	18.8713	0.00221473	1
cg13423666	1.09579	1.03343	1.16192	0.00221516	1
cg27561949	1.28944	1.09568	1.51748	0.0022154	1
cg24688636	0.973201	0.956412	0.990284	0.00221606	1
cg00847044	1.07034	1.02473	1.11799	0.00221851	1
cg17309711	1.15944	1.0546	1.27471	0.00221871	1
cg23418645	1.07185	1.02523	1.12058	0.00222495	1
cg26344026	1.07924	1.02776	1.13329	0.00222663	1
cg05611218	1.3915	1.12594	1.71969	0.00222925	1
cg20194595	1.0317	1.01127	1.05255	0.0022296	1
cg09573761	0.986097	0.977288	0.994987	0.00223059	1
cg26803969	1.02885	1.01026	1.04777	0.00223304	1
cg19673418	1.03087	1.01097	1.05115	0.00223311	1
cg23063986	0.764144	0.64309	0.907985	0.00223633	1
cg14989602	0.673325	0.522502	0.867683	0.00223654	1
cg08822136	0.98581	0.976818	0.994885	0.00223713	1
cg01099231	0.967502	0.947221	0.988217	0.00223877	1
cg11117531	1.11889	1.04111	1.20247	0.00224334	1
cg07359633	0.983472	0.973014	0.994041	0.00224496	1
cg00022308	0.890417	0.826537	0.959234	0.0022452	1
cg18590590	1.31005	1.10164	1.55789	0.00225098	1
cg24730871	1.19985	1.06748	1.34862	0.00225123	1
cg15344192	0.986699	0.978258	0.995213	0.00225355	1
cg21450723	1.01533	1.00546	1.02528	0.0022549	1
cg01211091	1.53931	1.16713	2.03017	0.00225545	1
cg24196612	1.04187	1.01481	1.06967	0.00225553	1
cg21209510	0.966766	0.946022	0.987966	0.00225834	1
cg07209960	1.2749	1.09084	1.49002	0.00226623	1
cg23498221	1.04404	1.01554	1.07333	0.0022692	1
cg23740897	1.46529	1.14653	1.87267	0.00226977	1
cg09431525	1.01881	1.00669	1.03107	0.00227038	1
cg14544666	1.01234	1.0044	1.02035	0.0022722	1
cg23049079	1.06868	1.02405	1.11525	0.00227314	1
cg19981409	0.987681	0.979849	0.995575	0.00227341	1
cg09492074	0.981324	0.969515	0.993278	0.00227451	1
cg01786048	0.988048	0.980446	0.995708	0.00227722	1
cg20011794	0.916557	0.866665	0.969321	0.00228033	1
cg18354686	1.29104	1.09564	1.52129	0.00228234	1
cg26280097	1.22745	1.07603	1.40018	0.00228242	1
cg04270788	0.713449	0.574316	0.886289	0.00228392	1
cg06450634	0.980988	0.968964	0.993162	0.00228508	1
cg16964728	0.986198	0.97743	0.995044	0.00228534	1
cg27126872	1.02764	1.00979	1.04581	0.00229047	1
cg21410100	1.06583	1.02304	1.11041	0.00229184	1
cg11422045	0.887478	0.821934	0.958249	0.00229272	1
cg11560280	0.986331	0.977645	0.995095	0.00229283	1
cg03006225	0.841115	0.752585	0.94006	0.00229385	1
cg27603495	1.02396	1.0085	1.03967	0.00229403	1
cg01473507	0.973638	0.95706	0.990504	0.00229663	1
cg02663175	0.980075	0.967476	0.992838	0.00229811	1
cg26005303	1.9433	1.26778	2.97878	0.00229825	1
cg18145877	1.02285	1.0081	1.03782	0.00230177	1
cg02309355	1.02821	1.00998	1.04676	0.00230301	1
cg18357696	1.05589	1.0196	1.09348	0.00230384	1
cg20699340	0.985575	0.976409	0.994827	0.00230446	1
cg14040055	1.14698	1.05016	1.25272	0.00230486	1
cg09474156	2.07062	1.29642	3.30715	0.00231426	1
cg24046927	0.884213	0.81691	0.957062	0.00231546	1
cg22059098	1.27364	1.09009	1.4881	0.0023165	1
cg06802488	1.01128	1.00401	1.01861	0.00231671	1
cg12844784	1.02609	1.00923	1.04324	0.0023183	1
cg24317255	1.10961	1.03778	1.18642	0.00231836	1
cg08322234	1.0388	1.01367	1.06457	0.0023187	1
cg21820517	0.900706	0.842091	0.963401	0.00231937	1
cg27229613	0.980257	0.967758	0.992917	0.00232176	1
cg06541968	0.984441	0.974555	0.994427	0.00232513	1
cg25112641	0.980076	0.967463	0.992854	0.00232553	1
cg21521949	1.15554	1.05287	1.26823	0.00232569	1
cg02795284	1.15086	1.05134	1.2598	0.00232771	1
cg13069892	0.989694	0.983116	0.996316	0.00232887	1
cg17683593	0.987586	0.979676	0.995559	0.00232941	1
cg26446803	1.01908	1.00675	1.03155	0.00233234	1
cg24929966	1.10689	1.03683	1.18169	0.00233307	1
cg16804825	1.07705	1.02678	1.12978	0.002336	1
cg10879722	0.968538	0.948803	0.988684	0.00233935	1
cg16558485	1.02573	1.00908	1.04264	0.00234024	1
cg08578510	0.553192	0.377795	0.81002	0.0023436	1
cg06263126	0.931933	0.890556	0.975233	0.00234781	1
cg16172837	0.887787	0.822256	0.958541	0.00234812	1
cg12537168	1.01889	1.00668	1.03124	0.00235106	1
cg01507342	0.979506	0.966524	0.992662	0.00235112	1
cg25129837	1.15341	1.05206	1.26453	0.00235496	1
cg03459656	0.986316	0.977597	0.995114	0.00235825	1
cg05765371	0.931599	0.890009	0.975132	0.00236054	1
cg19787125	0.983858	0.973592	0.994233	0.00236055	1
cg09446896	0.968563	0.948825	0.988712	0.00236066	1
cg03554264	1.47085	1.14697	1.88619	0.00236128	1
cg15244756	0.857187	0.776131	0.946708	0.00236172	1
cg06688916	0.978481	0.964854	0.992299	0.00236286	1
cg16028793	0.768012	0.647843	0.910472	0.00236329	1
cg19487819	0.968982	0.949498	0.988866	0.00236349	1
cg05721253	1.41568	1.13146	1.77129	0.00236448	1
cg25694156	1.87837	1.25095	2.82048	0.00236942	1
cg27021986	0.985601	0.976426	0.994863	0.00237262	1
cg01508159	2.45102	1.3748	4.36971	0.00237388	1
cg05526731	0.96207	0.938374	0.986365	0.00237401	1
cg14332346	1.12771	1.04358	1.21861	0.00237858	1
cg00659953	1.57603	1.17522	2.11353	0.00237888	1
cg07616990	1.15098	1.05117	1.26027	0.00238074	1
cg24598495	0.98924	0.982359	0.996168	0.00238142	1
cg10975913	0.736919	0.605179	0.897336	0.00238195	1
cg19052547	0.971032	0.952788	0.989625	0.002384	1
cg08206098	0.514408	0.334985	0.789933	0.00238576	1
cg12484393	0.815861	0.715457	0.930356	0.00238669	1
cg08501054	0.798753	0.690934	0.923398	0.00238832	1
cg15278510	0.704918	0.562507	0.883385	0.0023909	1
cg11383208	1.01065	1.00376	1.01759	0.00239509	1
cg14280424	0.744395	0.615233	0.900672	0.00239829	1
cg22488975	1.26358	1.08643	1.46962	0.00240016	1
cg12964065	1.02478	1.00871	1.0411	0.00240108	1
cg12345456	1.10331	1.03544	1.17562	0.00240524	1
cg06395692	1.83254	1.23929	2.70977	0.0024059	1
cg24937280	1.04429	1.01547	1.07393	0.00240795	1
cg25411849	1.10863	1.03719	1.18499	0.00240874	1
cg20132801	0.970915	0.95258	0.989604	0.00241097	1
cg14707431	1.47177	1.14663	1.88912	0.00241153	1
cg04322978	2.34384	1.35197	4.06336	0.0024119	1
cg26873311	0.786125	0.672941	0.918346	0.00241411	1
cg15545468	1.01572	1.00554	1.02601	0.00241575	1
cg02207638	1.01509	1.00531	1.02496	0.00241686	1
cg01936942	1.0505	1.01759	1.08448	0.00241733	1
cg22769406	1.58495	1.177	2.13428	0.00241856	1
cg26097271	0.798627	0.690624	0.923519	0.00241962	1
cg02647388	0.806627	0.702046	0.926787	0.00242053	1
cg07403374	0.92306	0.876516	0.972075	0.00242251	1
cg08983966	0.881878	0.81307	0.956509	0.0024233	1
cg11480264	1.74673	1.21809	2.5048	0.00242412	1
cg08662757	1.02508	1.0088	1.04162	0.00242413	1
cg18560720	1.28623	1.09312	1.51347	0.0024244	1
cg14861020	1.06201	1.0215	1.10413	0.00242905	1
cg09767504	1.82588	1.23723	2.6946	0.00242937	1
cg12229597	1.55416	1.16867	2.06682	0.00243274	1
cg12848614	0.971799	0.953986	0.989945	0.00244001	1
cg12016437	0.982502	0.971347	0.993784	0.00244367	1
cg21910821	1.04025	1.01404	1.06715	0.00244406	1
cg20857416	0.979078	0.965779	0.992561	0.00244512	1
cg08034216	2.13272	1.3066	3.48117	0.0024478	1
cg15737675	1.02359	1.00826	1.03914	0.0024491	1
cg23668631	0.982734	0.971723	0.993871	0.00245105	1
cg21227785	0.681153	0.531316	0.873246	0.00245137	1
cg00410831	1.20372	1.06764	1.35714	0.00245183	1
cg01300218	1.02688	1.00941	1.04466	0.00245201	1
cg15975750	1.01307	1.00459	1.02162	0.00245213	1
cg20109936	1.08613	1.02959	1.14578	0.00245234	1
cg03080538	0.92089	0.873067	0.971332	0.0024536	1
cg11140305	0.609964	0.442976	0.839901	0.00245394	1
cg13461813	1.05211	1.01809	1.08727	0.00245536	1
cg16439394	0.980569	0.968196	0.9931	0.00245613	1
cg04312903	1.47351	1.14658	1.89366	0.00245643	1
cg10397063	1.66746	1.19765	2.32157	0.00246066	1
cg09095364	1.01389	1.00488	1.02298	0.00246334	1
cg03358735	0.987102	0.978841	0.995432	0.00246378	1
cg25649515	0.994486	0.990934	0.998052	0.00246381	1
cg10227368	0.983707	0.973301	0.994225	0.0024665	1
cg25878744	1.02665	1.00932	1.04429	0.00246672	1
cg23820285	1.78748	1.22726	2.60342	0.00246687	1
cg24052772	0.972507	0.955111	0.99022	0.00246809	1
cg19120746	1.41001	1.12874	1.76137	0.00247171	1
cg08235864	1.01779	1.00623	1.02948	0.00247539	1
cg02369548	0.972881	0.95571	0.99036	0.00247626	1
cg13876222	0.955568	0.927849	0.984114	0.00247677	1
cg00807475	1.17903	1.05974	1.31174	0.00247754	1
cg04456666	1.22817	1.07509	1.40305	0.00247885	1
cg01391022	0.983595	0.973112	0.994192	0.00248278	1
cg14041462	1.10379	1.03538	1.17672	0.00248536	1
cg06445561	1.32163	1.10317	1.58336	0.00248583	1
cg18132076	1.01934	1.00677	1.03207	0.00248705	1
cg01179055	1.05026	1.01741	1.08416	0.00248707	1
cg13681935	0.981143	0.969114	0.993321	0.00248822	1
cg16171484	0.985847	0.976781	0.994997	0.0024955	1
cg09004287	0.988557	0.981209	0.995959	0.00249684	1
cg23545258	0.971129	0.95286	0.989748	0.00249894	1
cg03983213	0.985833	0.976756	0.994994	0.002499	1
cg12517191	1.03271	1.01139	1.05449	0.00249955	1
cg12126706	0.988492	0.981102	0.995937	0.00249972	1
cg13629903	0.926846	0.882305	0.973635	0.00250023	1
cg16471864	0.945313	0.911469	0.980414	0.00250041	1
cg23696955	1.01493	1.00523	1.02473	0.00250204	1
cg23349227	1.42102	1.13151	1.78461	0.00250387	1
cg18371475	1.01979	1.00692	1.03284	0.00250403	1
cg00813135	0.984488	0.974558	0.994518	0.00250421	1
cg04377618	0.975938	0.960647	0.991473	0.00250443	1
cg22678754	0.985513	0.976231	0.994883	0.00250629	1
cg12577610	1.40907	1.12812	1.75998	0.00250718	1
cg05363382	0.982928	0.972011	0.993968	0.00251334	1
cg10084202	0.53434	0.355853	0.802351	0.00251378	1
cg04499701	0.989361	0.98252	0.996249	0.00251405	1
cg10462803	0.869515	0.794123	0.952063	0.002515	1
cg06659629	0.987519	0.979506	0.995598	0.0025165	1
cg18550517	1.06376	1.02195	1.10728	0.00251816	1
cg10699049	1.04304	1.01491	1.07196	0.00252069	1
cg27287882	0.566096	0.391336	0.8189	0.00252267	1
cg04399205	0.976956	0.962287	0.991848	0.00252428	1
cg14172094	1.0332	1.01153	1.05534	0.00252616	1
cg13918626	0.976476	0.961505	0.99168	0.00252932	1
cg14781778	1.00937	1.00328	1.01549	0.0025316	1
cg01801101	0.98397	0.973701	0.994347	0.00253477	1
cg25836044	1.02769	1.00962	1.04607	0.00254091	1
cg21531040	1.01525	1.00532	1.02528	0.00254159	1
cg09225691	0.74496	0.615313	0.901924	0.00254357	1
cg02881684	1.01419	1.00495	1.02351	0.00254371	1
cg07937542	0.642189	0.481676	0.85619	0.00254425	1
cg12136772	1.01662	1.00579	1.02756	0.00254836	1
cg06666008	0.99099	0.985182	0.996833	0.0025486	1
cg02053114	0.964624	0.942319	0.987458	0.00254972	1
cg00776808	1.26675	1.08639	1.47706	0.00255075	1
cg13036656	0.98309	0.972258	0.994043	0.00255288	1
cg24662231	0.977978	0.963933	0.992229	0.00255329	1
cg19741500	0.451041	0.268885	0.756597	0.00255445	1
cg02619315	0.963329	0.940228	0.986997	0.00255475	1
cg19808825	0.85631	0.774199	0.947129	0.00256014	1
cg09609649	0.869905	0.794581	0.952368	0.00256037	1
cg00261942	0.854503	0.771505	0.946431	0.00256077	1
cg21754400	1.02415	1.00839	1.04015	0.00256159	1
cg04096472	0.892232	0.828503	0.960864	0.00256282	1
cg05201080	1.07071	1.02421	1.11932	0.00256356	1
cg17150854	1.10682	1.03617	1.1823	0.00256394	1
cg11967894	1.04431	1.01529	1.07415	0.00256441	1
cg21616552	1.1265	1.04258	1.21718	0.00256583	1
cg23037644	1.06017	1.02066	1.10121	0.00256699	1
cg27496526	0.984922	0.975243	0.994697	0.00256804	1
cg06211459	0.854719	0.771792	0.946557	0.00257184	1
cg09024430	2.46392	1.37091	4.42838	0.00257298	1
cg08515891	0.975931	0.960593	0.991514	0.00257549	1
cg12791245	0.977813	0.963652	0.992183	0.00257561	1
cg20541601	3.80409	1.5957	9.06879	0.00257617	1
cg00094255	0.970825	0.952311	0.989699	0.00257849	1
cg00793543	0.970029	0.951021	0.989416	0.00257988	1
cg01807408	0.987573	0.979575	0.995638	0.00258134	1
cg10802414	0.95351	0.924441	0.983494	0.00258148	1
cg13191935	0.212833	0.0777928	0.582289	0.00258603	1
cg23701703	1.11561	1.03898	1.19789	0.00258621	1
cg13664931	1.04742	1.01632	1.07947	0.00258662	1
cg07073120	1.08302	1.02827	1.1407	0.00258663	1
cg25949363	0.976543	0.961578	0.991741	0.00259082	1
cg27042266	0.990908	0.985037	0.996815	0.00259429	1
cg22975671	0.987214	0.978981	0.995516	0.00259681	1
cg17858880	1.01391	1.00484	1.02306	0.00259831	1
cg13978542	1.01958	1.00679	1.03253	0.00260132	1
cg18751588	0.916804	0.866408	0.970132	0.00260266	1
cg06443034	0.976952	0.962236	0.991893	0.00260316	1
cg01284116	1.05145	1.01766	1.08635	0.00260583	1
cg14626759	0.986115	0.977179	0.995132	0.0026066	1
cg17876581	0.732368	0.597948	0.897006	0.00260783	1
cg18288161	0.95674	0.929584	0.98469	0.00261158	1
cg13706352	1.96407	1.26552	3.0482	0.00261218	1
cg00220113	0.973756	0.957039	0.990765	0.00261228	1
cg19534703	1.04166	1.01434	1.06972	0.00261269	1
cg20054983	1.25913	1.0837	1.46297	0.00261341	1
cg08449838	0.86707	0.79016	0.951466	0.00261431	1
cg05734220	1.07735	1.0263	1.13093	0.00262694	1
cg17428748	1.07855	1.0267	1.13302	0.00262851	1
cg10326447	1.55583	1.16648	2.07514	0.00263115	1
cg00897276	0.971161	0.952816	0.989859	0.00263372	1
cg12138330	1.02423	1.00837	1.04034	0.00263401	1
cg00008671	0.990197	0.98386	0.996575	0.00263555	1
cg16996281	0.979267	0.965984	0.992732	0.00264	1
cg12801225	1.529	1.1593	2.01659	0.00264161	1
cg26385222	1.01488	1.00516	1.0247	0.00264297	1
cg24441185	0.949616	0.918145	0.982166	0.00264302	1
cg00549973	1.02251	1.00778	1.03746	0.00264327	1
cg16229954	1.17767	1.05856	1.31017	0.00264604	1
cg26175448	0.976786	0.961938	0.991863	0.00265233	1
cg11418783	1.01861	1.00643	1.03093	0.00265235	1
cg08263099	1.03384	1.01164	1.05652	0.00265506	1
cg06937552	0.816152	0.714855	0.931803	0.00265911	1
cg00361695	1.06302	1.02147	1.10625	0.00266285	1
cg10950723	0.978945	0.965447	0.992631	0.0026644	1
cg09636079	0.844336	0.756073	0.942904	0.00266826	1
cg12144374	0.638107	0.47596	0.855493	0.00266981	1
cg07889337	1.08459	1.02861	1.14362	0.00267308	1
cg06865363	0.989703	0.98304	0.996411	0.00267311	1
cg14846700	0.781607	0.66549	0.917985	0.00267476	1
cg21625386	1.0689	1.02341	1.11642	0.00267529	1
cg24675664	1.6295	1.18478	2.24116	0.00267656	1
cg21089584	1.01257	1.00435	1.02085	0.00267729	1
cg26779716	1.04978	1.01701	1.08361	0.00267947	1
cg13404054	1.01457	1.00504	1.0242	0.00268081	1
cg24394934	0.469037	0.286093	0.768965	0.00268645	1
cg08013737	0.916881	0.866371	0.970337	0.00268669	1
cg04018325	1.01165	1.00403	1.01932	0.0026867	1
cg12380209	0.611	0.44292	0.842864	0.00268696	1
cg15638898	1.20496	1.06683	1.36098	0.00268818	1
cg10636821	0.836331	0.744193	0.939877	0.00268967	1
cg08042223	0.981444	0.969511	0.993525	0.0026941	1
cg19774478	0.972951	0.955675	0.990538	0.00269928	1
cg01569170	1.28722	1.09147	1.51809	0.00270137	1
cg04173864	0.978456	0.96463	0.99248	0.0027032	1
cg14304349	1.03547	1.01215	1.05933	0.00270432	1
cg08558449	0.878954	0.807884	0.956276	0.00270625	1
cg01661494	0.774586	0.655509	0.915294	0.0027064	1
cg24131671	1.01318	1.00455	1.02188	0.00270719	1
cg04755409	1.25642	1.08229	1.45857	0.00271033	1
cg10414026	1.07218	1.02443	1.12216	0.00271258	1
cg13144783	0.989812	0.983209	0.99646	0.00271413	1
cg08167286	1.05983	1.02033	1.10086	0.0027144	1
cg06856889	0.969157	0.94951	0.989209	0.0027153	1
cg04172049	0.970828	0.952219	0.989801	0.00271623	1
cg11163620	1.02382	1.00819	1.0397	0.00271635	1
cg27259731	0.975158	0.959249	0.99133	0.00272168	1
cg12056618	7.29495	1.9893	26.7512	0.00272299	1
cg14291066	0.894934	0.832275	0.962311	0.00272382	1
cg23302638	0.730314	0.594626	0.896964	0.00272777	1
cg14667406	1.03536	1.0121	1.05916	0.00272806	1
cg06754984	1.10761	1.03598	1.1842	0.00273328	1
cg01937793	1.04607	1.0157	1.07736	0.0027374	1
cg00329014	0.809748	0.705319	0.929638	0.00273861	1
cg15357661	0.640326	0.478326	0.857193	0.00274108	1
cg01385795	0.7696	0.648384	0.913478	0.00274563	1
cg09580153	0.946205	0.912573	0.981076	0.00274787	1
cg09563311	1.05213	1.01771	1.08771	0.00275088	1
cg01811543	2.82324	1.43116	5.56937	0.00275218	1
cg07345708	0.835669	0.743013	0.93988	0.00275307	1
cg01844514	0.980086	0.967265	0.993077	0.00275342	1
cg23279929	0.820478	0.720788	0.933956	0.0027559	1
cg25845890	0.853301	0.769122	0.946693	0.00275603	1
cg22434763	0.988668	0.981319	0.996073	0.00275676	1
cg25461186	1.01141	1.00392	1.01895	0.0027607	1
cg12277310	0.829921	0.734549	0.937675	0.00276082	1
cg06421755	0.694964	0.547613	0.881965	0.00276204	1
cg07315006	0.977972	0.96381	0.992342	0.00276303	1
cg16430880	0.943216	0.907785	0.98003	0.00276649	1
cg04831076	0.986421	0.977627	0.995293	0.00276654	1
cg05207583	1.02062	1.00707	1.03436	0.00276894	1
cg08160663	1.28741	1.09105	1.5191	0.00277133	1
cg02619167	0.87034	0.794656	0.953232	0.00277284	1
cg26041446	1.04792	1.01627	1.08055	0.00277476	1
cg24221639	0.972567	0.955004	0.990454	0.00277588	1
cg06543526	1.09728	1.03252	1.16611	0.00277991	1
cg04899361	0.953134	0.923621	0.98359	0.00278036	1
cg12894055	0.977263	0.962645	0.992103	0.00278103	1
cg04160749	1.01849	1.00633	1.03079	0.00278298	1
cg12360886	0.874368	0.80072	0.954788	0.0027849	1
cg17870270	1.25254	1.08068	1.45175	0.00278712	1
cg24356544	1.01782	1.0061	1.02967	0.00278804	1
cg24598330	0.599774	0.429007	0.838517	0.00278854	1
cg05825596	0.986448	0.977665	0.99531	0.00278921	1
cg18039855	0.734911	0.600553	0.899329	0.00278972	1
cg23555592	0.701862	0.556496	0.8852	0.00279161	1
cg21273366	0.436698	0.253635	0.751886	0.00280224	1
cg26507657	1.08464	1.02835	1.14401	0.00280498	1
cg11625077	0.926564	0.881353	0.974095	0.00280555	1
cg16716518	1.35875	1.11125	1.66137	0.00280637	1
cg25356006	0.955626	0.927594	0.984504	0.00280733	1
cg17961725	0.98806	0.980306	0.995876	0.00280938	1
cg04979725	2.13375	1.29787	3.50798	0.00280968	1
cg10046115	0.886629	0.819333	0.959453	0.00281091	1
cg06482428	1.01386	1.00475	1.02305	0.00281104	1
cg01557883	0.90104	0.841502	0.964791	0.00281159	1
cg15975824	1.04834	1.01637	1.08132	0.00281355	1
cg06722639	1.01095	1.00375	1.0182	0.00281534	1
cg13825375	1.02463	1.00839	1.04112	0.0028287	1
cg15927263	1.54726	1.16175	2.06069	0.00283156	1
cg09303701	0.850578	0.764832	0.945937	0.0028346	1
cg20522761	0.979278	0.965905	0.992836	0.00283719	1
cg19404832	1.01784	1.00609	1.02973	0.00283792	1
cg06022902	1.05894	1.01985	1.09952	0.00284021	1
cg00335219	0.985427	0.975971	0.994974	0.00284303	1
cg07131157	0.901715	0.842477	0.965117	0.00284436	1
cg21502927	1.0376	1.01274	1.06306	0.00284771	1
cg19393755	1.01432	1.00489	1.02384	0.00284923	1
cg21132577	0.9877	0.979701	0.995764	0.00285222	1
cg25032865	0.974769	0.958539	0.991274	0.00285425	1
cg02775804	0.985181	0.975562	0.994894	0.00285862	1
cg08083901	1.22389	1.07172	1.39765	0.00285874	1
cg09475815	0.70034	0.554161	0.88508	0.00286382	1
cg02669989	1.6704	1.19224	2.34035	0.00286489	1
cg21323630	0.975691	0.960036	0.991602	0.00286512	1
cg14093553	0.98483	0.974983	0.994777	0.00286975	1
cg25763212	1.04214	1.01424	1.07081	0.00287011	1
cg16548265	1.10837	1.03587	1.18595	0.00287209	1
cg05835744	1.46605	1.14001	1.88533	0.00287307	1
cg06517965	0.793971	0.682225	0.924021	0.00287311	1
cg13610241	0.880611	0.809991	0.957388	0.0028733	1
cg21940568	1.04572	1.01543	1.07692	0.00287702	1
cg24522384	1.03511	1.01189	1.05887	0.00287814	1
cg14784497	1.02847	1.00966	1.04764	0.00288204	1
cg17501384	1.02481	1.00843	1.04147	0.00288229	1
cg01062937	0.977087	0.962304	0.992097	0.00288233	1
cg27317026	1.634	1.18302	2.25691	0.00288327	1
cg11366683	1.04122	1.01392	1.06926	0.00288527	1
cg16555194	0.988809	0.981517	0.996156	0.00288535	1
cg23679085	1.66073	1.18956	2.31852	0.00288637	1
cg25575145	1.03722	1.01258	1.06246	0.00288879	1
cg01281078	1.38438	1.1177	1.71468	0.00289004	1
cg13390740	0.924398	0.877799	0.97347	0.00289366	1
cg27077250	1.85156	1.23451	2.77704	0.00289575	1
cg09603584	1.08757	1.02912	1.14934	0.002896	1
cg18402490	0.660101	0.502227	0.867601	0.00289817	1
cg07753791	1.42647	1.12913	1.80211	0.00289918	1
cg23846459	1.39615	1.12084	1.73908	0.00290183	1
cg02886878	0.629387	0.464042	0.853646	0.00290529	1
cg10799668	1.01859	1.00631	1.03101	0.00290593	1
cg14294077	1.01199	1.00408	1.01997	0.00290867	1
cg01632865	0.984206	0.973944	0.994576	0.00291016	1
cg18310205	1.17654	1.0571	1.30947	0.00291371	1
cg12911496	0.986276	0.977341	0.995293	0.00292002	1
cg14568183	1.0201	1.00682	1.03356	0.00292202	1
cg03672752	1.10208	1.03374	1.17495	0.00292229	1
cg25882709	0.911842	0.858063	0.96899	0.00292404	1
cg11621667	1.15906	1.05167	1.27741	0.00292424	1
cg00598766	0.902681	0.8438	0.96567	0.00292997	1
cg04681472	1.06397	1.02138	1.10833	0.00293085	1
cg24058386	0.984465	0.97436	0.994674	0.00293431	1
cg17771031	0.991755	0.98636	0.99718	0.00293534	1
cg26266274	1.0136	1.00462	1.02266	0.00293588	1
cg21375105	0.982275	0.970768	0.99392	0.00293686	1
cg03216867	0.981662	0.969761	0.993709	0.00293926	1
cg10852165	1.01326	1.0045	1.0221	0.00294038	1
cg07379140	1.34422	1.1061	1.63359	0.00294208	1
cg13295193	1.64164	1.1841	2.27599	0.00294249	1
cg18316500	1.0269	1.00909	1.04503	0.00294335	1
cg00766289	0.984006	0.973601	0.994521	0.00295023	1
cg01496136	0.98697	0.978472	0.995542	0.00295269	1
cg26809127	1.14047	1.04579	1.24371	0.00295293	1
cg11449134	1.12751	1.04172	1.22036	0.0029547	1
cg22509539	0.90016	0.83984	0.964814	0.00295735	1
cg04824913	1.14795	1.04811	1.2573	0.00295872	1
cg04918708	1.0396	1.01331	1.06658	0.00295875	1
cg02055889	0.987427	0.979221	0.995701	0.00296049	1
cg20808681	1.79306	1.21994	2.63542	0.00296145	1
cg26221568	0.934734	0.894036	0.977285	0.0029624	1
cg13136036	0.873507	0.79896	0.95501	0.00296459	1
cg06388099	0.978829	0.96511	0.992743	0.00296518	1
cg15766557	1.90994	1.24635	2.92685	0.00296725	1
cg19839691	0.866313	0.788054	0.952342	0.00297012	1
cg22522920	0.966888	0.945643	0.988609	0.00297209	1
cg19027827	1.06358	1.02119	1.10773	0.002976	1
cg06244512	1.43556	1.13083	1.8224	0.00297832	1
cg12304937	0.986579	0.97782	0.995416	0.00298064	1
cg21035402	0.93747	0.898351	0.978294	0.00298712	1
cg18663341	1.09315	1.03073	1.15934	0.00298756	1
cg16185947	0.983737	0.973146	0.994443	0.00298775	1
cg01410163	0.989128	0.982015	0.996293	0.0029918	1
cg22785136	1.01273	1.00431	1.02122	0.00299185	1
cg23608384	1.05267	1.01759	1.08896	0.00299534	1
cg04675539	0.98017	0.96729	0.993222	0.00299975	1
cg10911660	1.05589	1.01864	1.0945	0.00300069	1
cg05458429	0.980708	0.968172	0.993407	0.00300138	1
cg12893030	1.01457	1.00492	1.02431	0.00300776	1
cg06638338	1.08841	1.02917	1.15107	0.0030079	1
cg05358291	0.982965	0.971871	0.994186	0.00300846	1
cg13219127	1.04519	1.01511	1.07616	0.0030093	1
cg14871712	0.803872	0.695896	0.928603	0.00301217	1
cg00827973	0.847118	0.759165	0.945261	0.00301248	1
cg13421038	1.07813	1.02585	1.13308	0.00301363	1
cg03477609	0.984885	0.975023	0.994847	0.00301481	1
cg20503117	1.12302	1.04014	1.2125	0.00301711	1
cg04710628	0.938842	0.900487	0.978831	0.00302354	1
cg04401067	1.00998	1.00337	1.01663	0.00302366	1
cg11368281	1.16918	1.05442	1.29645	0.00302582	1
cg13519918	1.01216	1.00411	1.02028	0.00302657	1
cg25684349	0.988619	0.981167	0.996128	0.00302737	1
cg16684939	2.10613	1.28718	3.44613	0.00302856	1
cg17565360	0.904106	0.845818	0.96641	0.00302863	1
[truncated: 309,894+ more rows]
