# Supplementary material for: Epigenome-wide gene–age interaction analysis reveals reversed effects of PRODH DNA methylation on survival between young and elderly early-stage NSCLC patients
Source: Aging (Albany NY). 2020 Jun 8;12(11):10642–62. doi: 10.18632/aging.103284 (PMC7346054; doi:10.18632/aging.103284)
Supplement: Supplementary Material 3 [file aging-12-103284-s003..xlsx]

## Sheet: Supp3_trans_genes_result
Supplementary Material 3. Results of genome-wide trans-regulation analysis of cg14326354 methylation using gene expression data and DNA methylation data from TCGA.
Gene	CpG	r	pvalue	Bonf
BCL11B	cg14326354	-0.460181	1.36e-18	2.78e-14
C14orf64	cg14326354	-0.430578	3.09e-16	6.33e-12
IRF2	cg14326354	-0.40041	4.63e-14	9.49e-10
PRKCQ	cg14326354	-0.399974	4.96e-14	1.02e-09
CTSE	cg14326354	-0.395189	1.05e-13	2.15e-09
ZNF695	cg14326354	0.390568	2.14e-13	4.38e-09
CD97	cg14326354	-0.38451	5.33e-13	1.09e-08
CYFIP2	cg14326354	-0.38397	5.78e-13	1.19e-08
RAB37	cg14326354	-0.383221	6.47e-13	1.33e-08
SOX8	cg14326354	-0.37723	1.56e-12	3.21e-08
OLFM1	cg14326354	-0.377033	1.61e-12	3.3e-08
DCTD	cg14326354	-0.375955	1.88e-12	3.86e-08
SFTPA2	cg14326354	-0.372503	3.1e-12	6.36e-08
UBA7	cg14326354	-0.370763	3.98e-12	8.15e-08
CTSO	cg14326354	-0.369975	4.45e-12	9.12e-08
CD5	cg14326354	-0.369403	4.83e-12	9.89e-08
RAC2	cg14326354	-0.369097	5.04e-12	1.03e-07
BRIX1	cg14326354	0.367956	5.92e-12	1.21e-07
CD40LG	cg14326354	-0.36766	6.18e-12	1.27e-07
EPHB6	cg14326354	-0.366551	7.22e-12	1.48e-07
ABI3BP	cg14326354	-0.364791	9.24e-12	1.9e-07
ZBTB7C	cg14326354	-0.362461	1.28e-11	2.62e-07
BLNK	cg14326354	-0.362217	1.32e-11	2.71e-07
TRANK1	cg14326354	-0.361888	1.38e-11	2.84e-07
SFTPA1	cg14326354	-0.361281	1.51e-11	3.09e-07
NFATC1	cg14326354	-0.360037	1.79e-11	3.66e-07
CD96	cg14326354	-0.358109	2.33e-11	4.77e-07
CCT5	cg14326354	0.357883	2.4e-11	4.92e-07
TLR3	cg14326354	-0.357792	2.43e-11	4.98e-07
ZNF131	cg14326354	0.357007	2.71e-11	5.55e-07
PIP5K1A	cg14326354	0.356151	3.04e-11	6.23e-07
CNDP2	cg14326354	-0.354318	3.89e-11	7.98e-07
PSRC1	cg14326354	0.353955	4.09e-11	8.38e-07
MAGEA3	cg14326354	0.35302	4.64e-11	9.5e-07
CCL19	cg14326354	-0.353016	4.64e-11	9.51e-07
NAPSB	cg14326354	-0.352179	5.19e-11	1.06e-06
GRAP2	cg14326354	-0.352158	5.2e-11	1.07e-06
CYP4F12	cg14326354	-0.351998	5.32e-11	1.09e-06
TMEM173	cg14326354	-0.351675	5.55e-11	1.14e-06
LOC115110	cg14326354	-0.351226	5.89e-11	1.21e-06
ZBTB7A	cg14326354	-0.351226	5.89e-11	1.21e-06
GNG7	cg14326354	-0.35046	6.53e-11	1.34e-06
APOL3	cg14326354	-0.350164	6.79e-11	1.39e-06
CD22	cg14326354	-0.350015	6.92e-11	1.42e-06
ERCC5	cg14326354	-0.348975	7.95e-11	1.63e-06
BCL2L14	cg14326354	-0.347329	9.87e-11	2.02e-06
LRRK1	cg14326354	-0.346239	1.14e-10	2.34e-06
PTK2B	cg14326354	-0.346168	1.15e-10	2.36e-06
TPK1	cg14326354	-0.345855	1.2e-10	2.46e-06
C11orf63	cg14326354	-0.345631	1.23e-10	2.53e-06
SPTLC3	cg14326354	-0.345447	1.26e-10	2.59e-06
DARC	cg14326354	-0.345324	1.28e-10	2.63e-06
ILF2	cg14326354	0.345058	1.33e-10	2.73e-06
SPIB	cg14326354	-0.344514	1.43e-10	2.93e-06
TNFRSF13B	cg14326354	-0.344032	1.52e-10	3.12e-06
TRIM22	cg14326354	-0.343896	1.55e-10	3.17e-06
RYR2	cg14326354	-0.343716	1.58e-10	3.25e-06
TMEM37	cg14326354	-0.341927	2e-10	4.09e-06
CBX7	cg14326354	-0.341002	2.25e-10	4.61e-06
C5orf22	cg14326354	0.341	2.25e-10	4.61e-06
CSE1L	cg14326354	0.34079	2.31e-10	4.74e-06
GCNT4	cg14326354	-0.340599	2.37e-10	4.85e-06
FAM133A	cg14326354	0.339501	2.73e-10	5.59e-06
PYHIN1	cg14326354	-0.339367	2.77e-10	5.68e-06
PTPRN2	cg14326354	-0.339133	2.86e-10	5.86e-06
PAIP1	cg14326354	0.338773	2.99e-10	6.13e-06
C5orf33	cg14326354	0.338158	3.23e-10	6.63e-06
FLT3LG	cg14326354	-0.337648	3.45e-10	7.08e-06
SELL	cg14326354	-0.337626	3.46e-10	7.1e-06
TNFRSF1B	cg14326354	-0.337489	3.52e-10	7.22e-06
STIP1	cg14326354	0.337345	3.59e-10	7.35e-06
GATA6	cg14326354	-0.336869	3.81e-10	7.81e-06
COL2A1	cg14326354	0.336745	3.87e-10	7.93e-06
C3	cg14326354	-0.335909	4.3e-10	8.82e-06
SFTPD	cg14326354	-0.335891	4.31e-10	8.84e-06
LOC100188949	cg14326354	-0.335891	4.31e-10	8.84e-06
GTPBP1	cg14326354	-0.335618	4.46e-10	9.15e-06
C1orf135	cg14326354	0.335607	4.47e-10	9.16e-06
BEND7	cg14326354	-0.335169	4.72e-10	9.68e-06
PRKD2	cg14326354	-0.33478	4.96e-10	1.02e-05
CKS1B	cg14326354	0.334656	5.04e-10	1.03e-05
HLA-E	cg14326354	-0.3344	5.2e-10	1.07e-05
VPS72	cg14326354	0.332729	6.41e-10	1.31e-05
MAGEA2	cg14326354	0.332275	6.79e-10	1.39e-05
MAGEA6	cg14326354	0.332106	6.93e-10	1.42e-05
JAK2	cg14326354	-0.332073	6.96e-10	1.43e-05
RCC1	cg14326354	0.331862	7.14e-10	1.46e-05
ANO5	cg14326354	-0.331595	7.39e-10	1.51e-05
VILL	cg14326354	-0.331435	7.53e-10	1.54e-05
PLCH2	cg14326354	-0.331387	7.58e-10	1.55e-05
FAM83D	cg14326354	0.331146	7.81e-10	1.6e-05
C12orf56	cg14326354	0.330753	8.2e-10	1.68e-05
IKZF1	cg14326354	-0.330555	8.4e-10	1.72e-05
SMARCA2	cg14326354	-0.330206	8.77e-10	1.8e-05
C7orf68	cg14326354	0.330133	8.85e-10	1.81e-05
APOBEC3H	cg14326354	-0.329658	9.39e-10	1.92e-05
SKP2	cg14326354	0.32871	1.06e-09	2.16e-05
C5orf34	cg14326354	0.328679	1.06e-09	2.17e-05
KIAA0406	cg14326354	0.328653	1.06e-09	2.18e-05
TRPV6	cg14326354	-0.328295	1.11e-09	2.28e-05
TAF11	cg14326354	0.328239	1.12e-09	2.29e-05
MYBL2	cg14326354	0.327993	1.15e-09	2.36e-05
IRF8	cg14326354	-0.327793	1.18e-09	2.42e-05
CD6	cg14326354	-0.327317	1.25e-09	2.57e-05
DSN1	cg14326354	0.326883	1.32e-09	2.71e-05
KLRB1	cg14326354	-0.326597	1.37e-09	2.8e-05
CARD11	cg14326354	-0.326	1.47e-09	3.01e-05
KIF2C	cg14326354	0.324806	1.7e-09	3.49e-05
APOBEC3G	cg14326354	-0.32381	1.92e-09	3.93e-05
CYP4F22	cg14326354	-0.323776	1.93e-09	3.95e-05
ZNF831	cg14326354	-0.323671	1.95e-09	4e-05
OSBPL7	cg14326354	-0.323406	2.01e-09	4.13e-05
ITM2A	cg14326354	-0.323278	2.05e-09	4.19e-05
NUP155	cg14326354	0.323065	2.1e-09	4.3e-05
DNMT3B	cg14326354	0.32306	2.1e-09	4.3e-05
GPR114	cg14326354	-0.322747	2.18e-09	4.47e-05
MED8	cg14326354	0.322624	2.21e-09	4.54e-05
GPR25	cg14326354	-0.322395	2.27e-09	4.66e-05
PTGDS	cg14326354	-0.322199	2.33e-09	4.77e-05
BLK	cg14326354	-0.32205	2.37e-09	4.86e-05
TOLLIP	cg14326354	-0.32169	2.48e-09	5.08e-05
MEGF11	cg14326354	-0.321036	2.68e-09	5.49e-05
KIAA0748	cg14326354	-0.320927	2.71e-09	5.56e-05
APOBEC3F	cg14326354	-0.3209	2.72e-09	5.58e-05
SIT1	cg14326354	-0.320863	2.73e-09	5.6e-05
LGALS4	cg14326354	-0.320851	2.74e-09	5.61e-05
NLRC3	cg14326354	-0.320405	2.89e-09	5.92e-05
TMEM106C	cg14326354	0.320155	2.97e-09	6.1e-05
FLT3	cg14326354	-0.320104	2.99e-09	6.13e-05
APOBEC3C	cg14326354	-0.319799	3.1e-09	6.36e-05
DNMT3A	cg14326354	0.319541	3.2e-09	6.56e-05
EXOSC10	cg14326354	0.319478	3.22e-09	6.61e-05
EDA2R	cg14326354	-0.319051	3.39e-09	6.95e-05
LGALS9C	cg14326354	-0.319002	3.41e-09	6.99e-05
TRAT1	cg14326354	-0.318806	3.49e-09	7.16e-05
CD3E	cg14326354	-0.318806	3.49e-09	7.16e-05
SCNM1	cg14326354	0.318771	3.51e-09	7.19e-05
CDC42EP4	cg14326354	-0.318666	3.55e-09	7.28e-05
UBE2T	cg14326354	0.318449	3.64e-09	7.47e-05
QPRT	cg14326354	0.318298	3.71e-09	7.6e-05
PRKCB	cg14326354	-0.318284	3.72e-09	7.62e-05
C1orf186	cg14326354	-0.318216	3.75e-09	7.68e-05
ZFYVE28	cg14326354	-0.318207	3.75e-09	7.69e-05
PLEKHA2	cg14326354	-0.317963	3.86e-09	7.91e-05
E2F1	cg14326354	0.317737	3.96e-09	8.13e-05
NFIX	cg14326354	-0.317725	3.97e-09	8.14e-05
UST	cg14326354	-0.317514	4.07e-09	8.34e-05
FAIM3	cg14326354	-0.317449	4.1e-09	8.41e-05
IL33	cg14326354	-0.317358	4.14e-09	8.5e-05
SERPINA1	cg14326354	-0.316895	4.38e-09	8.97e-05
MTF2	cg14326354	0.316823	4.41e-09	9.05e-05
GPR55	cg14326354	-0.316469	4.6e-09	9.44e-05
TMEM132C	cg14326354	-0.316354	4.67e-09	9.56e-05
RCSD1	cg14326354	-0.316123	4.79e-09	9.83e-05
KLF2	cg14326354	-0.315666	5.06e-09	0.000103697
GVIN1	cg14326354	-0.31562	5.09e-09	0.000104258
SOX9	cg14326354	-0.315437	5.2e-09	0.000106516
BTG2	cg14326354	-0.315367	5.24e-09	0.000107388
ZWINT	cg14326354	0.314786	5.61e-09	0.000114947
TMEM154	cg14326354	-0.314743	5.64e-09	0.000115527
MS4A1	cg14326354	-0.314191	6.01e-09	0.000123225
BTLA	cg14326354	-0.314052	6.11e-09	0.000125239
C17orf75	cg14326354	0.314036	6.12e-09	0.000125469
SMC1B	cg14326354	0.31396	6.17e-09	0.000126586
PIGU	cg14326354	0.313789	6.3e-09	0.000129134
CD74	cg14326354	-0.313695	6.37e-09	0.000130559
PLEKHM1	cg14326354	-0.313665	6.39e-09	0.000131015
LY9	cg14326354	-0.313403	6.59e-09	0.000135068
WRNIP1	cg14326354	0.313235	6.72e-09	0.00013773
CD27	cg14326354	-0.313048	6.87e-09	0.000140755
SCML4	cg14326354	-0.31274	7.12e-09	0.000145882
KDM1A	cg14326354	0.312115	7.65e-09	0.000156841
CASKIN1	cg14326354	0.312106	7.66e-09	0.000156998
AKNA	cg14326354	-0.312062	7.7e-09	0.000157805
CYLD	cg14326354	-0.311963	7.79e-09	0.000159631
TLR5	cg14326354	-0.31191	7.83e-09	0.000160612
SLAMF1	cg14326354	-0.31178	7.95e-09	0.000163028
GPA33	cg14326354	-0.311454	8.26e-09	0.000169291
RASAL3	cg14326354	-0.31141	8.3e-09	0.000170157
OAF	cg14326354	-0.311109	8.59e-09	0.000176179
NSUN2	cg14326354	0.310688	9.02e-09	0.000184918
IL12B	cg14326354	-0.310581	9.13e-09	0.000187228
MAZ	cg14326354	0.310158	9.59e-09	0.000196557
TBC1D10C	cg14326354	-0.310138	9.61e-09	0.000197013
MAP4K1	cg14326354	-0.310101	9.65e-09	0.000197841
SPATA18	cg14326354	-0.309838	9.95e-09	0.000203916
MEX3A	cg14326354	0.309304	1.06e-08	0.000216779
C14orf73	cg14326354	-0.308644	1.14e-08	0.000233795
PIWIL3	cg14326354	0.30846	1.16e-08	0.000238759
CTAG2	cg14326354	0.308325	1.18e-08	0.000242456
CD37	cg14326354	-0.30811	1.21e-08	0.00024849
LGALS9	cg14326354	-0.308099	1.21e-08	0.000248801
IQGAP2	cg14326354	-0.308005	1.23e-08	0.000251477
SLAMF6	cg14326354	-0.307947	1.23e-08	0.000253143
ERN2	cg14326354	-0.306922	1.39e-08	0.000284443
DNA2	cg14326354	0.306862	1.4e-08	0.00028639
CD79B	cg14326354	-0.306376	1.48e-08	0.000302639
RNF2	cg14326354	0.306013	1.54e-08	0.000315336
CD247	cg14326354	-0.305991	1.54e-08	0.000316093
IL16	cg14326354	-0.30588	1.56e-08	0.000320087
LGALS2	cg14326354	-0.305459	1.64e-08	0.000335693
PNCK	cg14326354	0.305396	1.65e-08	0.000338093
PARP2	cg14326354	0.305346	1.66e-08	0.000340018
CCND2	cg14326354	-0.3053	1.67e-08	0.000341778
CELF2	cg14326354	-0.305011	1.72e-08	0.000353085
IL7	cg14326354	-0.30485	1.75e-08	0.000359573
KIF23	cg14326354	0.304776	1.77e-08	0.000362577
CTSS	cg14326354	-0.304636	1.8e-08	0.000368345
PLA2G2D	cg14326354	-0.304584	1.81e-08	0.000370486
FCER2	cg14326354	-0.304533	1.82e-08	0.000372634
TRAIP	cg14326354	0.304484	1.83e-08	0.00037469
AGXT2L2	cg14326354	-0.304162	1.9e-08	0.000388512
DENND2D	cg14326354	-0.303948	1.94e-08	0.000397958
C18orf2	cg14326354	0.303905	1.95e-08	0.000399902
PLA2G4C	cg14326354	-0.303552	2.03e-08	0.000416052
UBASH3A	cg14326354	-0.303428	2.06e-08	0.000421836
CREBL2	cg14326354	-0.303382	2.07e-08	0.000424027
RASSF5	cg14326354	-0.303325	2.08e-08	0.00042676
ITIH5	cg14326354	-0.303161	2.12e-08	0.000434677
CT47A1	cg14326354	0.303111	2.13e-08	0.000437079
PIK3IP1	cg14326354	-0.303032	2.15e-08	0.000440984
2020-03-06	cg14326354	0.302918	2.18e-08	0.000446627
MACROD2	cg14326354	-0.302689	2.24e-08	0.000458228
DDX27	cg14326354	0.302348	2.32e-08	0.00047602
HLA-F	cg14326354	-0.301983	2.42e-08	0.00049577
NUF2	cg14326354	0.301945	2.43e-08	0.000497873
CENPA	cg14326354	0.301893	2.44e-08	0.000500757
CFI	cg14326354	-0.301525	2.54e-08	0.000521727
SCHIP1	cg14326354	0.301423	2.57e-08	0.000527677
SCTR	cg14326354	-0.301279	2.62e-08	0.000536198
ABCD2	cg14326354	-0.30109	2.67e-08	0.000547591
TNFRSF14	cg14326354	-0.300943	2.71e-08	0.000556594
GIMAP2	cg14326354	-0.300725	2.78e-08	0.000570221
PLD4	cg14326354	-0.300514	2.85e-08	0.000583704
ITGAL	cg14326354	-0.300206	2.95e-08	0.000603978
STAT5A	cg14326354	-0.300202	2.95e-08	0.00060424
MVP	cg14326354	-0.3002	2.95e-08	0.000604353
MEOX1	cg14326354	-0.300026	3.01e-08	0.000616118
NUP85	cg14326354	0.300005	3.01e-08	0.000617525
ZYG11A	cg14326354	0.299975	3.02e-08	0.000619599
CCNF	cg14326354	0.299845	3.07e-08	0.000628543
ITK	cg14326354	-0.299567	3.16e-08	0.000648157
CNR2	cg14326354	-0.299428	3.21e-08	0.000658201
CCRL2	cg14326354	-0.299391	3.22e-08	0.000660879
KCNH5	cg14326354	0.299121	3.32e-08	0.000680835
IL2RG	cg14326354	-0.29905	3.35e-08	0.000686223
S1PR4	cg14326354	-0.298945	3.39e-08	0.000694211
ACAP1	cg14326354	-0.298886	3.41e-08	0.000698701
ARHGEF6	cg14326354	-0.298703	3.48e-08	0.000712942
CTPS	cg14326354	0.298644	3.5e-08	0.000717581
TRAF3IP3	cg14326354	-0.298524	3.55e-08	0.000727115
GIMAP7	cg14326354	-0.298456	3.57e-08	0.000732568
CD2	cg14326354	-0.298358	3.61e-08	0.000740517
GINS1	cg14326354	0.298356	3.61e-08	0.000740702
CDC20	cg14326354	0.298324	3.63e-08	0.000743318
FAM64A	cg14326354	0.298211	3.67e-08	0.000752548
STMN1	cg14326354	0.297975	3.77e-08	0.000772307
GTF2H4	cg14326354	0.297926	3.79e-08	0.000776514
SIGLEC8	cg14326354	-0.297625	3.91e-08	0.000802543
LOC723809	cg14326354	-0.297547	3.95e-08	0.000809452
LOC148709	cg14326354	0.297407	4.01e-08	0.000821968
KIAA1908	cg14326354	-0.297405	4.01e-08	0.000822116
RAD1	cg14326354	0.297275	4.07e-08	0.000833917
SOX12	cg14326354	0.297152	4.12e-08	0.000845234
2020-09-14	cg14326354	0.297121	4.14e-08	0.000848067
CCDC69	cg14326354	-0.29693	4.22e-08	0.000865998
ZAP70	cg14326354	-0.296655	4.35e-08	0.000892437
SLA2	cg14326354	-0.296654	4.35e-08	0.00089249
PFDN4	cg14326354	0.296375	4.49e-08	0.000920135
DMBT1	cg14326354	-0.296223	4.56e-08	0.000935469
MBP	cg14326354	-0.296118	4.62e-08	0.000946319
WDR70	cg14326354	0.296011	4.67e-08	0.000957355
C14orf139	cg14326354	-0.295998	4.68e-08	0.00095868
ZNF643	cg14326354	0.295963	4.69e-08	0.000962405
PDCD6	cg14326354	0.295948	4.7e-08	0.000963937
ERBB4	cg14326354	-0.295912	4.72e-08	0.00096772
LTA	cg14326354	-0.295882	4.74e-08	0.000970956
MAP3K14	cg14326354	-0.295592	4.89e-08	0.00100201
CENPQ	cg14326354	0.295305	5.04e-08	0.00103376
FAM72D	cg14326354	0.295262	5.07e-08	0.00103864
METTL3	cg14326354	0.295103	5.15e-08	0.00105669
KLHL7	cg14326354	0.294976	5.23e-08	0.00107134
CCDC141	cg14326354	-0.29492	5.26e-08	0.00107797
MTMR10	cg14326354	-0.294851	5.3e-08	0.00108599
FAM54A	cg14326354	0.294843	5.3e-08	0.00108702
FAM155B	cg14326354	-0.294783	5.34e-08	0.00109403
AURKA	cg14326354	0.294751	5.35e-08	0.00109782
RCOR2	cg14326354	0.294725	5.37e-08	0.00110101
MLPH	cg14326354	-0.29466	5.41e-08	0.0011087
SH2D3C	cg14326354	-0.294617	5.43e-08	0.00111392
SASS6	cg14326354	0.294548	5.47e-08	0.00112228
PRSS12	cg14326354	-0.29454	5.48e-08	0.00112329
IRX1	cg14326354	-0.294496	5.51e-08	0.00112861
NASP	cg14326354	0.2944	5.56e-08	0.0011404
ARHGAP25	cg14326354	-0.294222	5.67e-08	0.00116263
AADAC	cg14326354	-0.294165	5.71e-08	0.00116981
CADM3	cg14326354	-0.294141	5.72e-08	0.00117289
MEST	cg14326354	0.293952	5.84e-08	0.00119704
TRIP13	cg14326354	0.293664	6.02e-08	0.00123493
NRXN2	cg14326354	-0.293635	6.04e-08	0.00123875
MSRA	cg14326354	-0.2931	6.4e-08	0.00131228
PSD4	cg14326354	-0.292637	6.73e-08	0.00137945
CARD8	cg14326354	-0.292566	6.78e-08	0.00139001
LOC284233	cg14326354	-0.292553	6.79e-08	0.00139188
KIF15	cg14326354	0.292349	6.94e-08	0.00142272
ACTR5	cg14326354	0.291932	7.26e-08	0.00148793
MAPK10	cg14326354	-0.291852	7.32e-08	0.0015007
TMEM229B	cg14326354	-0.291599	7.52e-08	0.00154196
C5orf56	cg14326354	-0.291489	7.61e-08	0.00156027
ARHGEF1	cg14326354	-0.291338	7.73e-08	0.00158564
CD48	cg14326354	-0.291267	7.79e-08	0.00159778
PCDHGC3	cg14326354	-0.291228	7.83e-08	0.0016044
AQP11	cg14326354	0.291205	7.85e-08	0.00160833
MRTO4	cg14326354	0.291167	7.88e-08	0.00161483
GPR18	cg14326354	-0.291126	7.91e-08	0.00162196
PIGR	cg14326354	-0.291102	7.93e-08	0.00162622
TUBB	cg14326354	0.291043	7.98e-08	0.00163644
GBAS	cg14326354	0.291016	8.01e-08	0.0016412
MFNG	cg14326354	-0.290905	8.1e-08	0.0016608
SIP1	cg14326354	0.290793	8.2e-08	0.00168076
TNFSF14	cg14326354	-0.290461	8.49e-08	0.00174142
BTF3L4	cg14326354	0.290419	8.53e-08	0.00174925
KIF22	cg14326354	0.290377	8.57e-08	0.00175698
SASH3	cg14326354	-0.290302	8.64e-08	0.00177115
APBB1IP	cg14326354	-0.290219	8.72e-08	0.0017869
TPSAB1	cg14326354	-0.290162	8.77e-08	0.00179765
FAM78A	cg14326354	-0.289884	9.03e-08	0.00185168
CXCR5	cg14326354	-0.28981	9.1e-08	0.00186631
SPN	cg14326354	-0.2898	9.11e-08	0.00186834
CCR7	cg14326354	-0.289763	9.15e-08	0.00187569
ADH1B	cg14326354	-0.289686	9.22e-08	0.0018912
PPIH	cg14326354	0.289669	9.24e-08	0.00189458
DCAF13	cg14326354	0.289651	9.26e-08	0.0018982
TMEM69	cg14326354	0.289627	9.28e-08	0.0019031
CDC42EP1	cg14326354	-0.289541	9.37e-08	0.00192053
TAPBPL	cg14326354	-0.289439	9.47e-08	0.0019414
HLA-DOA	cg14326354	-0.289437	9.47e-08	0.00194186
ZNF560	cg14326354	0.289345	9.56e-08	0.00196084
RFC4	cg14326354	0.289279	9.63e-08	0.00197463
YRDC	cg14326354	0.28911	9.81e-08	0.00201048
GPR64	cg14326354	-0.289082	9.84e-08	0.00201643
RASA3	cg14326354	-0.288966	9.96e-08	0.00204136
TMEM189	cg14326354	0.288909	1e-07	0.00205381
ATP9B	cg14326354	-0.288874	1.01e-07	0.0020615
LOC284749	cg14326354	-0.288665	1.03e-07	0.00210758
CCR6	cg14326354	-0.288637	1.03e-07	0.00211373
PLCG2	cg14326354	-0.288526	1.04e-07	0.00213875
EME1	cg14326354	0.288521	1.04e-07	0.00214001
TRIT1	cg14326354	0.288512	1.04e-07	0.00214188
CREB3L1	cg14326354	-0.28847	1.05e-07	0.00215141
ASB2	cg14326354	-0.288392	1.06e-07	0.00216942
ARHGAP15	cg14326354	-0.288299	1.07e-07	0.00219086
CSAG2	cg14326354	0.288273	1.07e-07	0.00219672
C1orf52	cg14326354	0.288191	1.08e-07	0.00221606
PCBD2	cg14326354	-0.288122	1.09e-07	0.00223212
C16orf59	cg14326354	0.287912	1.11e-07	0.0022823
FAM129C	cg14326354	-0.287836	1.12e-07	0.00230054
TCF7	cg14326354	-0.287823	1.12e-07	0.00230386
ZBTB32	cg14326354	-0.287793	1.13e-07	0.00231114
COL4A3BP	cg14326354	-0.287793	1.13e-07	0.00231121
TMC8	cg14326354	-0.287773	1.13e-07	0.00231609
C8orf34	cg14326354	-0.287738	1.13e-07	0.00232449
KCND3	cg14326354	-0.287707	1.14e-07	0.00233209
KLRG1	cg14326354	-0.287682	1.14e-07	0.00233845
RAI2	cg14326354	-0.287643	1.15e-07	0.00234792
NME6	cg14326354	0.287624	1.15e-07	0.00235258
KCNK1	cg14326354	-0.287607	1.15e-07	0.00235689
TBC1D22A	cg14326354	-0.287601	1.15e-07	0.00235836
LMX1B	cg14326354	-0.287587	1.15e-07	0.00236186
CCT6A	cg14326354	0.287477	1.17e-07	0.00238936
RUNX3	cg14326354	-0.28747	1.17e-07	0.00239117
TRIM21	cg14326354	-0.287357	1.18e-07	0.00241974
DYNLRB2	cg14326354	-0.287311	1.19e-07	0.00243151
TBXAS1	cg14326354	-0.287246	1.19e-07	0.00244824
CDK5RAP1	cg14326354	0.287214	1.2e-07	0.00245647
LCK	cg14326354	-0.287038	1.22e-07	0.00250264
THEMIS	cg14326354	-0.28703	1.22e-07	0.00250459
FANCB	cg14326354	0.287019	1.22e-07	0.00250746
DSCC1	cg14326354	0.286988	1.23e-07	0.00251584
CT47B1	cg14326354	0.286984	1.23e-07	0.00251665
PANX3	cg14326354	0.286735	1.26e-07	0.00258348
SP140	cg14326354	-0.286733	1.26e-07	0.00258407
SUV39H2	cg14326354	0.286553	1.28e-07	0.00263336
PSMD4	cg14326354	0.28649	1.29e-07	0.0026508
ASPHD2	cg14326354	-0.286303	1.32e-07	0.00270344
TMC4	cg14326354	-0.286127	1.34e-07	0.00275393
CXCR3	cg14326354	-0.285931	1.37e-07	0.00281108
CIITA	cg14326354	-0.285762	1.4e-07	0.0028613
LOC221710	cg14326354	0.285697	1.41e-07	0.00288079
SLC5A12	cg14326354	0.285689	1.41e-07	0.00288308
RBM43	cg14326354	-0.285612	1.42e-07	0.00290659
SFTA1P	cg14326354	-0.285568	1.42e-07	0.00292002
TMEM220	cg14326354	-0.285333	1.46e-07	0.00299266
KIFC1	cg14326354	0.285145	1.49e-07	0.00305199
POC1A	cg14326354	0.285097	1.5e-07	0.00306715
SELPLG	cg14326354	-0.284997	1.51e-07	0.00309964
LYSMD1	cg14326354	0.284809	1.54e-07	0.00316103
PTPRCAP	cg14326354	-0.284765	1.55e-07	0.00317559
SERPINB1	cg14326354	-0.284603	1.58e-07	0.00322957
NFKB1	cg14326354	-0.284585	1.58e-07	0.00323565
STAP1	cg14326354	-0.28442	1.61e-07	0.00329167
POU2AF1	cg14326354	-0.284395	1.61e-07	0.00330031
CDCA8	cg14326354	0.284372	1.61e-07	0.00330834
IL15RA	cg14326354	-0.284271	1.63e-07	0.00334303
LOC653501	cg14326354	-0.284249	1.63e-07	0.00335084
C1orf163	cg14326354	0.284232	1.64e-07	0.00335693
C7	cg14326354	-0.284125	1.66e-07	0.00339453
MAGEA10	cg14326354	0.283946	1.69e-07	0.00345822
LILRA4	cg14326354	-0.283785	1.72e-07	0.00351642
FCRL3	cg14326354	-0.283744	1.72e-07	0.00353158
FAM72B	cg14326354	0.283699	1.73e-07	0.00354807
P2RY12	cg14326354	-0.283538	1.76e-07	0.0036078
CSAG3	cg14326354	0.283438	1.78e-07	0.00364542
AHCYL2	cg14326354	-0.283403	1.78e-07	0.00365898
GOLPH3	cg14326354	0.283293	1.81e-07	0.00370077
SRGAP3	cg14326354	-0.283235	1.82e-07	0.00372312
DUOX1	cg14326354	-0.283222	1.82e-07	0.00372807
ANXA4	cg14326354	-0.283173	1.83e-07	0.003747
ADAMTS20	cg14326354	0.283157	1.83e-07	0.00375349
CDK1	cg14326354	0.283141	1.83e-07	0.00375972
SMG5	cg14326354	0.283084	1.84e-07	0.00378193
PARP4	cg14326354	-0.283072	1.85e-07	0.00378641
ZBTB8B	cg14326354	0.283028	1.86e-07	0.00380377
FAM110C	cg14326354	-0.282933	1.87e-07	0.00384131
CLDN2	cg14326354	-0.282827	1.89e-07	0.00388369
TROAP	cg14326354	0.282545	1.95e-07	0.00399884
LEPRE1	cg14326354	0.282364	1.99e-07	0.00407454
SDHA	cg14326354	0.282328	1.99e-07	0.00408978
HLTF	cg14326354	0.281923	2.08e-07	0.00426398
HSD17B2	cg14326354	-0.281823	2.1e-07	0.00430823
WBSCR17	cg14326354	-0.281779	2.11e-07	0.00432817
GPSM2	cg14326354	0.28172	2.12e-07	0.00435423
C11orf84	cg14326354	0.281653	2.14e-07	0.00438476
ATP6V0A4	cg14326354	0.281559	2.16e-07	0.00442701
DEPDC1	cg14326354	0.281477	2.18e-07	0.00446476
CLEC9A	cg14326354	-0.281469	2.18e-07	0.00446828
NME5	cg14326354	-0.281462	2.18e-07	0.0044715
CCT3	cg14326354	0.281455	2.18e-07	0.00447509
CCDC48	cg14326354	-0.281338	2.21e-07	0.00452895
TARS	cg14326354	0.28106	2.27e-07	0.00466057
HN1L	cg14326354	0.281035	2.28e-07	0.00467274
MAGEA12	cg14326354	0.281021	2.28e-07	0.00467945
SELP	cg14326354	-0.280994	2.29e-07	0.00469243
EIF1AD	cg14326354	0.280977	2.29e-07	0.00470044
MYO18B	cg14326354	0.280922	2.31e-07	0.00472703
TLR10	cg14326354	-0.280773	2.34e-07	0.0048002
MED20	cg14326354	0.280731	2.35e-07	0.00482053
ZNF285	cg14326354	0.280593	2.39e-07	0.00488968
RBP5	cg14326354	-0.280586	2.39e-07	0.00489322
ROS1	cg14326354	-0.280558	2.39e-07	0.00490725
PAK1IP1	cg14326354	0.280534	2.4e-07	0.00491895
ZNF516	cg14326354	-0.280517	2.4e-07	0.0049277
AURKAPS1	cg14326354	0.280504	2.41e-07	0.00493436
C8orf51	cg14326354	0.280366	2.44e-07	0.00500466
FAM20A	cg14326354	-0.280198	2.48e-07	0.00509146
CCR5	cg14326354	-0.280187	2.49e-07	0.00509751
SLC9A9	cg14326354	-0.280032	2.53e-07	0.00517879
GAPT	cg14326354	-0.279974	2.54e-07	0.00520976
METTL7B	cg14326354	-0.279884	2.56e-07	0.00525798
P2RY10	cg14326354	-0.279815	2.58e-07	0.00529499
2020-09-01	cg14326354	-0.279741	2.6e-07	0.0053354
PYCARD	cg14326354	-0.279694	2.62e-07	0.00536127
UBE2C	cg14326354	0.27956	2.65e-07	0.005435
SPCS3	cg14326354	-0.279301	2.72e-07	0.00558109
MAP6D1	cg14326354	0.279184	2.75e-07	0.00564796
EIF3B	cg14326354	0.279017	2.8e-07	0.00574469
PHF15	cg14326354	-0.278993	2.81e-07	0.0057588
BTN3A3	cg14326354	-0.278875	2.84e-07	0.00582845
DTX1	cg14326354	-0.278697	2.9e-07	0.00593509
CD3D	cg14326354	-0.278592	2.93e-07	0.00599942
MAN1C1	cg14326354	-0.27852	2.95e-07	0.00604352
CBFA2T3	cg14326354	-0.2785	2.95e-07	0.00605539
NCAPH	cg14326354	0.278387	2.99e-07	0.00612545
RARRES3	cg14326354	-0.27837	2.99e-07	0.00613632
TNFSF13	cg14326354	-0.278329	3.01e-07	0.00616189
CABYR	cg14326354	0.278311	3.01e-07	0.00617317
LTF	cg14326354	-0.278258	3.03e-07	0.00620686
LIN9	cg14326354	0.278174	3.05e-07	0.00625975
RPL39L	cg14326354	0.278158	3.06e-07	0.00626986
TMEM206	cg14326354	0.277963	3.12e-07	0.00639566
NAPA	cg14326354	-0.277858	3.15e-07	0.00646402
MYBPC2	cg14326354	-0.277841	3.16e-07	0.00647541
PAX5	cg14326354	-0.277829	3.16e-07	0.00648315
C19orf66	cg14326354	-0.277704	3.2e-07	0.00656601
ZNF683	cg14326354	-0.277639	3.22e-07	0.00660903
HYLS1	cg14326354	0.277535	3.26e-07	0.00667928
GALNT5	cg14326354	-0.277533	3.26e-07	0.00668061
ATP1A3	cg14326354	-0.277497	3.27e-07	0.00670527
RASGRP1	cg14326354	-0.27749	3.27e-07	0.00670962
EBI3	cg14326354	-0.277359	3.32e-07	0.00679977
EVI2B	cg14326354	-0.277275	3.34e-07	0.0068573
POLE2	cg14326354	0.277246	3.35e-07	0.00687754
C7orf70	cg14326354	0.277184	3.38e-07	0.00692116
EIF2AK1	cg14326354	0.277158	3.38e-07	0.00693925
HSF2BP	cg14326354	0.277059	3.42e-07	0.00700954
LRMP	cg14326354	-0.276948	3.46e-07	0.00708868
UBLCP1	cg14326354	-0.276915	3.47e-07	0.00711194
SUPT3H	cg14326354	0.276915	3.47e-07	0.00711223
GCET2	cg14326354	-0.276829	3.5e-07	0.00717391
F11	cg14326354	-0.276653	3.56e-07	0.00730297
GJB1	cg14326354	-0.276329	3.68e-07	0.00754581
APOL6	cg14326354	-0.276306	3.69e-07	0.00756346
TAGAP	cg14326354	-0.276243	3.71e-07	0.00761129
CYSLTR1	cg14326354	-0.276043	3.79e-07	0.00776648
IGJ	cg14326354	-0.275997	3.81e-07	0.00780277
YBX2	cg14326354	0.275884	3.85e-07	0.00789205
HIST1H3J	cg14326354	0.275857	3.86e-07	0.00791348
ATAD2	cg14326354	0.275796	3.88e-07	0.00796266
C15orf23	cg14326354	0.275794	3.88e-07	0.007964
MRPL9	cg14326354	0.275718	3.91e-07	0.00802522
AURKB	cg14326354	0.275693	3.92e-07	0.00804501
SLC8A3	cg14326354	-0.275662	3.94e-07	0.00807076
MTA3	cg14326354	0.275517	3.99e-07	0.00818907
MCM10	cg14326354	0.275466	4.01e-07	0.00823083
COL29A1	cg14326354	-0.275173	4.14e-07	0.00847725
MRPS30	cg14326354	0.275165	4.14e-07	0.00848417
HCG26	cg14326354	-0.275082	4.17e-07	0.00855514
ADAMTS17	cg14326354	-0.275015	4.2e-07	0.00861243
GIMAP1	cg14326354	-0.274855	4.27e-07	0.00875165
CDCA3	cg14326354	0.274853	4.27e-07	0.00875337
DMKN	cg14326354	-0.274697	4.34e-07	0.00889158
PANK1	cg14326354	0.274691	4.34e-07	0.00889698
SP100	cg14326354	-0.274611	4.37e-07	0.00896847
TXK	cg14326354	-0.274353	4.49e-07	0.00920315
RAG1AP1	cg14326354	0.274071	4.62e-07	0.0094666
MAT2B	cg14326354	-0.273951	4.67e-07	0.00958128
TRIM5	cg14326354	-0.273875	4.71e-07	0.00965415
ST3GAL1	cg14326354	-0.273804	4.74e-07	0.00972316
LAPTM4B	cg14326354	0.273557	4.86e-07	0.00996543
MAMSTR	cg14326354	0.273557	4.86e-07	0.00996598
WDR67	cg14326354	0.273494	4.89e-07	0.0100289
C14orf49	cg14326354	-0.273468	4.9e-07	0.0100544
TFPI	cg14326354	-0.273431	4.92e-07	0.0100922
LRRFIP1	cg14326354	-0.273388	4.94e-07	0.0101357
GPM6A	cg14326354	-0.273347	4.96e-07	0.0101766
ORC1L	cg14326354	0.273329	4.97e-07	0.0101952
CEACAM21	cg14326354	-0.273146	5.06e-07	0.010383
KLRK1	cg14326354	-0.27308	5.1e-07	0.0104511
LTB	cg14326354	-0.273027	5.12e-07	0.0105061
GLTSCR2	cg14326354	-0.272992	5.14e-07	0.010543
DOCK8	cg14326354	-0.272975	5.15e-07	0.0105607
PLK1	cg14326354	0.272833	5.22e-07	0.0107114
PLA1A	cg14326354	-0.272821	5.23e-07	0.0107244
GPR108	cg14326354	-0.272817	5.23e-07	0.010728
SLAMF7	cg14326354	-0.272737	5.28e-07	0.0108144
CLECL1	cg14326354	-0.272689	5.3e-07	0.0108654
C18orf1	cg14326354	-0.272627	5.33e-07	0.0109329
C19orf26	cg14326354	0.272458	5.42e-07	0.0111182
PPIL1	cg14326354	0.272426	5.44e-07	0.0111542
SNRPC	cg14326354	0.27234	5.49e-07	0.0112488
RETSAT	cg14326354	-0.272328	5.49e-07	0.0112632
CENPI	cg14326354	0.272262	5.53e-07	0.011337
BRD9	cg14326354	0.27223	5.55e-07	0.0113728
RIN3	cg14326354	-0.272228	5.55e-07	0.0113752
CTAG1B	cg14326354	0.272084	5.63e-07	0.0115384
LRRK2	cg14326354	-0.272053	5.65e-07	0.0115746
SNX30	cg14326354	-0.272039	5.65e-07	0.0115909
CDC42SE2	cg14326354	-0.271912	5.73e-07	0.0117376
FAM19A2	cg14326354	-0.271739	5.82e-07	0.0119406
ORC6L	cg14326354	0.271649	5.88e-07	0.0120476
NEK2	cg14326354	0.271603	5.9e-07	0.0121023
SLU7	cg14326354	-0.271573	5.92e-07	0.0121388
MAGEC2	cg14326354	0.271533	5.94e-07	0.0121865
PLEKHA8	cg14326354	0.271518	5.95e-07	0.0122042
CSAG1	cg14326354	0.271445	6e-07	0.0122928
GHDC	cg14326354	-0.271419	6.01e-07	0.0123242
UNC5A	cg14326354	-0.271353	6.05e-07	0.012405
GABRQ	cg14326354	0.271266	6.1e-07	0.0125124
KLHL6	cg14326354	-0.271112	6.2e-07	0.0127048
PARP11	cg14326354	-0.271075	6.22e-07	0.0127517
FGL2	cg14326354	-0.271013	6.26e-07	0.0128289
NCR3	cg14326354	-0.270901	6.33e-07	0.0129719
C17orf103	cg14326354	-0.270718	6.44e-07	0.013209
CLDN18	cg14326354	-0.270606	6.51e-07	0.0133554
FANCG	cg14326354	0.270598	6.52e-07	0.0133665
FLAD1	cg14326354	0.270564	6.54e-07	0.0134111
PLLP	cg14326354	-0.270459	6.61e-07	0.01355
STK10	cg14326354	-0.270411	6.64e-07	0.0136147
FGD1	cg14326354	0.270259	6.74e-07	0.0138195
MR1	cg14326354	-0.270245	6.75e-07	0.0138386
CHEK1	cg14326354	0.270166	6.8e-07	0.0139472
EML2	cg14326354	-0.270121	6.83e-07	0.014009
MAGEB1	cg14326354	0.270032	6.89e-07	0.0141319
CBX3	cg14326354	0.26996	6.94e-07	0.014233
CYP4B1	cg14326354	-0.269767	7.08e-07	0.0145052
C16orf54	cg14326354	-0.26975	7.09e-07	0.0145296
LGALS3BP	cg14326354	-0.26963	7.17e-07	0.0147021
BIRC5	cg14326354	0.269557	7.22e-07	0.0148074
SLC25A33	cg14326354	0.2695	7.26e-07	0.0148905
DHX58	cg14326354	-0.269463	7.29e-07	0.0149446
MRPL11	cg14326354	0.269388	7.34e-07	0.0150558
DPH2	cg14326354	0.269272	7.43e-07	0.0152273
SDCBP2	cg14326354	-0.269209	7.47e-07	0.0153227
CCR4	cg14326354	-0.269196	7.48e-07	0.015342
ADAMTS8	cg14326354	-0.269156	7.51e-07	0.0154016
MDGA1	cg14326354	-0.269137	7.53e-07	0.0154306
SPAG5	cg14326354	0.269072	7.57e-07	0.0155291
ACN9	cg14326354	0.269068	7.58e-07	0.0155358
C5orf20	cg14326354	-0.269018	7.62e-07	0.0156123
MRPL48	cg14326354	0.268988	7.64e-07	0.0156585
DDX55	cg14326354	0.268935	7.68e-07	0.0157398
BTN3A2	cg14326354	-0.268823	7.76e-07	0.0159131
PARK2	cg14326354	-0.268726	7.84e-07	0.0160654
CBR4	cg14326354	-0.268696	7.86e-07	0.0161123
B2M	cg14326354	-0.268574	7.95e-07	0.0163054
SKAP1	cg14326354	-0.268461	8.04e-07	0.0164868
HTR2C	cg14326354	0.268426	8.07e-07	0.0165435
C6orf97	cg14326354	-0.268315	8.16e-07	0.016724
DOCK2	cg14326354	-0.26828	8.19e-07	0.0167815
LOC440356	cg14326354	0.268226	8.23e-07	0.0168693
GAGE4	cg14326354	0.268152	8.29e-07	0.0169918
ANK1	cg14326354	-0.268144	8.29e-07	0.0170051
MAP2K3	cg14326354	-0.267992	8.42e-07	0.0172599
CHI3L2	cg14326354	-0.267832	8.55e-07	0.0175303
ZNF229	cg14326354	0.267749	8.62e-07	0.0176738
ESPL1	cg14326354	0.267563	8.78e-07	0.0179963
LIG3	cg14326354	0.267553	8.79e-07	0.018015
KCNIP1	cg14326354	-0.267545	8.79e-07	0.018029
FAM72A	cg14326354	0.2675	8.83e-07	0.0181072
SUPV3L1	cg14326354	0.267475	8.85e-07	0.0181524
PCGF6	cg14326354	0.267392	8.93e-07	0.018299
SEL1L3	cg14326354	-0.267374	8.94e-07	0.0183316
SARDH	cg14326354	-0.267323	8.99e-07	0.0184216
KIAA0090	cg14326354	0.267304	9e-07	0.0184557
C10orf95	cg14326354	-0.267292	9.01e-07	0.0184784
KBTBD11	cg14326354	-0.267142	9.15e-07	0.0187504
EXO1	cg14326354	0.267141	9.15e-07	0.0187519
RDBP	cg14326354	0.26712	9.16e-07	0.018789
GIMAP4	cg14326354	-0.267119	9.17e-07	0.0187919
GZMK	cg14326354	-0.2671	9.18e-07	0.0188264
STEAP3	cg14326354	-0.26707	9.21e-07	0.0188806
PARS2	cg14326354	0.267025	9.25e-07	0.0189648
TBRG4	cg14326354	0.267023	9.25e-07	0.018968
PML	cg14326354	-0.266815	9.44e-07	0.0193544
TDRD3	cg14326354	-0.266785	9.47e-07	0.0194106
HPDL	cg14326354	0.266785	9.47e-07	0.0194116
FOXQ1	cg14326354	-0.266709	9.54e-07	0.0195554
IQCC	cg14326354	0.266688	9.56e-07	0.0195961
SH3RF2	cg14326354	-0.266678	9.57e-07	0.0196139
WWC1	cg14326354	-0.266659	9.58e-07	0.0196499
RASGRP2	cg14326354	-0.266658	9.59e-07	0.0196531
PPP1R8	cg14326354	0.266638	9.61e-07	0.0196915
RPL13AP17	cg14326354	-0.266615	9.63e-07	0.0197342
TIMM8A	cg14326354	0.266429	9.8e-07	0.0200947
C10orf88	cg14326354	0.266416	9.81e-07	0.0201197
MIA2	cg14326354	-0.26635	9.88e-07	0.0202487
CCNB2	cg14326354	0.266266	9.96e-07	0.0204134
UBE2V2	cg14326354	0.266213	1e-06	0.0205199
STAT6	cg14326354	-0.266206	1e-06	0.0205337
IFRD1	cg14326354	0.266145	1.01e-06	0.0206545
XRCC2	cg14326354	0.26613	1.01e-06	0.0206857
C7orf30	cg14326354	0.266115	1.01e-06	0.0207146
SULT1C2	cg14326354	-0.266066	1.02e-06	0.0208139
HIST1H3B	cg14326354	0.26597	1.02e-06	0.0210071
BANK1	cg14326354	-0.265961	1.03e-06	0.0210264
PHOX2A	cg14326354	0.265847	1.04e-06	0.0212601
KPNA2	cg14326354	0.265723	1.05e-06	0.0215154
SUN1	cg14326354	0.265658	1.06e-06	0.0216508
LOC399815	cg14326354	0.265656	1.06e-06	0.0216551
KNDC1	cg14326354	-0.265652	1.06e-06	0.0216632
PRIM1	cg14326354	0.265583	1.06e-06	0.021808
GTF2F1	cg14326354	-0.265488	1.07e-06	0.0220102
RNASEN	cg14326354	0.265402	1.08e-06	0.0221934
ABCB1	cg14326354	-0.265394	1.08e-06	0.02221
OR8A1	cg14326354	0.265294	1.09e-06	0.022427
C6orf129	cg14326354	0.26529	1.09e-06	0.0224338
PLK4	cg14326354	0.265254	1.1e-06	0.0225121
CLEC10A	cg14326354	-0.265245	1.1e-06	0.0225335
FLI1	cg14326354	-0.265217	1.1e-06	0.0225942
GIMAP6	cg14326354	-0.265197	1.1e-06	0.0226365
TBR1	cg14326354	0.265182	1.11e-06	0.0226705
MYOM2	cg14326354	-0.265067	1.12e-06	0.0229217
TLR7	cg14326354	-0.265034	1.12e-06	0.022995
GRIN2D	cg14326354	0.264997	1.13e-06	0.0230781
RASSF2	cg14326354	-0.264949	1.13e-06	0.023186
SYK	cg14326354	-0.264876	1.14e-06	0.0233477
ISLR2	cg14326354	-0.264807	1.15e-06	0.0235043
JAZF1	cg14326354	-0.264774	1.15e-06	0.0235804
MTBP	cg14326354	0.264675	1.16e-06	0.0238054
GAB3	cg14326354	-0.264671	1.16e-06	0.0238141
RAD54L	cg14326354	0.264617	1.17e-06	0.023938
PARP3	cg14326354	-0.264611	1.17e-06	0.0239513
KLF13	cg14326354	-0.264576	1.17e-06	0.0240323
GAGE2A	cg14326354	0.264547	1.18e-06	0.0240992
CDC45	cg14326354	0.264496	1.18e-06	0.0242196
FIGNL1	cg14326354	0.264363	1.2e-06	0.0245304
NPDC1	cg14326354	-0.264271	1.21e-06	0.0247483
ANKRD22	cg14326354	-0.264266	1.21e-06	0.0247611
C4A	cg14326354	-0.264108	1.23e-06	0.0251403
GFRA1	cg14326354	-0.264067	1.23e-06	0.0252388
CCNG1	cg14326354	-0.264044	1.23e-06	0.0252937
FLJ42289	cg14326354	-0.263938	1.25e-06	0.0255541
D4S234E	cg14326354	-0.263858	1.26e-06	0.0257512
WHAMM	cg14326354	-0.263833	1.26e-06	0.025811
ENTPD3	cg14326354	-0.263729	1.27e-06	0.0260709
THRB	cg14326354	-0.263703	1.27e-06	0.026135
CD19	cg14326354	-0.263643	1.28e-06	0.0262856
ART4	cg14326354	-0.263621	1.28e-06	0.0263434
HLA-DOB	cg14326354	-0.263572	1.29e-06	0.0264654
TTK	cg14326354	0.263528	1.3e-06	0.0265783
PDZD4	cg14326354	-0.263498	1.3e-06	0.0266553
C9orf167	cg14326354	-0.263489	1.3e-06	0.0266779
MAOB	cg14326354	-0.263462	1.3e-06	0.0267465
GAGE2C	cg14326354	0.263373	1.32e-06	0.0269744
ADAM6	cg14326354	-0.263372	1.32e-06	0.0269778
UTP3	cg14326354	-0.263256	1.33e-06	0.0272791
E2F3	cg14326354	0.263101	1.35e-06	0.0276879
MTX1	cg14326354	0.263088	1.35e-06	0.0277217
C1orf56	cg14326354	0.26308	1.35e-06	0.0277418
SH2D1A	cg14326354	-0.26303	1.36e-06	0.0278754
APOBEC3D	cg14326354	-0.26302	1.36e-06	0.0279015
FBXO8	cg14326354	-0.263015	1.36e-06	0.0279149
FCRLA	cg14326354	-0.263007	1.36e-06	0.0279369
GMNN	cg14326354	0.263006	1.36e-06	0.0279411
GIMAP5	cg14326354	-0.262922	1.37e-06	0.0281648
SAMD3	cg14326354	-0.262862	1.38e-06	0.0283268
CD79A	cg14326354	-0.262816	1.39e-06	0.0284515
CDK18	cg14326354	-0.262804	1.39e-06	0.0284858
CYTIP	cg14326354	-0.262728	1.4e-06	0.0286922
PPP1R16B	cg14326354	-0.262632	1.41e-06	0.0289564
RAD54B	cg14326354	0.262614	1.41e-06	0.029006
N4BP2L1	cg14326354	-0.262602	1.42e-06	0.0290397
GABRR1	cg14326354	0.262534	1.43e-06	0.0292289
CLIC2	cg14326354	-0.262509	1.43e-06	0.0292983
PLCL2	cg14326354	-0.262399	1.44e-06	0.029607
ADH1A	cg14326354	-0.262315	1.46e-06	0.0298471
TET1	cg14326354	0.262166	1.48e-06	0.0302721
IRF4	cg14326354	-0.262156	1.48e-06	0.0303003
RAB6A	cg14326354	0.262127	1.48e-06	0.0303867
CCDC21	cg14326354	0.26212	1.48e-06	0.0304044
PRTFDC1	cg14326354	0.262111	1.48e-06	0.0304326
TUBD1	cg14326354	0.262065	1.49e-06	0.0305664
APEX1	cg14326354	0.262054	1.49e-06	0.0305967
DNAH14	cg14326354	0.26201	1.5e-06	0.030727
CEP55	cg14326354	0.261971	1.5e-06	0.0308409
GAGE12D	cg14326354	0.261965	1.51e-06	0.0308575
SERPINB6	cg14326354	-0.261924	1.51e-06	0.0309801
CD244	cg14326354	-0.261876	1.52e-06	0.0311217
ECE2	cg14326354	0.261809	1.53e-06	0.0313188
BMP7	cg14326354	-0.261696	1.54e-06	0.0316573
MMP28	cg14326354	-0.261662	1.55e-06	0.0317602
CHIT1	cg14326354	-0.261419	1.59e-06	0.0325024
OIP5	cg14326354	0.261278	1.61e-06	0.0329426
AKAP13	cg14326354	-0.261089	1.64e-06	0.0335383
FAM24B	cg14326354	0.261066	1.64e-06	0.0336093
TMEM232	cg14326354	-0.260995	1.65e-06	0.033838
PIK3R6	cg14326354	-0.260687	1.7e-06	0.0348392
SERPINA3	cg14326354	-0.260664	1.7e-06	0.0349181
SIRPG	cg14326354	-0.260643	1.71e-06	0.0349867
DPY30	cg14326354	0.260641	1.71e-06	0.0349917
ZFPM1	cg14326354	-0.260564	1.72e-06	0.0352471
MCM4	cg14326354	0.260432	1.74e-06	0.035691
CDC7	cg14326354	0.260419	1.74e-06	0.0357357
STARD5	cg14326354	-0.260354	1.75e-06	0.0359548
ABCA10	cg14326354	-0.260143	1.79e-06	0.0366796
KIAA2022	cg14326354	-0.260082	1.8e-06	0.0368936
VWA5A	cg14326354	-0.26005	1.8e-06	0.0370035
C1orf96	cg14326354	0.260039	1.81e-06	0.0370415
LOC116437	cg14326354	0.25999	1.82e-06	0.037215
DUOXA1	cg14326354	-0.259956	1.82e-06	0.0373359
CD52	cg14326354	-0.259916	1.83e-06	0.037475
LYSMD2	cg14326354	-0.259884	1.83e-06	0.0375892
MLKL	cg14326354	-0.259868	1.84e-06	0.0376458
SLC27A1	cg14326354	-0.25985	1.84e-06	0.0377118
MGLL	cg14326354	-0.259829	1.84e-06	0.0377846
SCGB2A1	cg14326354	-0.259793	1.85e-06	0.0379136
TMEM65	cg14326354	0.259782	1.85e-06	0.0379541
C1orf112	cg14326354	0.259713	1.86e-06	0.0382008
TRIM14	cg14326354	-0.259684	1.87e-06	0.0383064
ELMO1	cg14326354	-0.259659	1.87e-06	0.0383978
CLEC17A	cg14326354	-0.259574	1.89e-06	0.0387037
MCM2	cg14326354	0.259501	1.9e-06	0.0389711
LYL1	cg14326354	-0.259361	1.93e-06	0.0394901
FBXL18	cg14326354	0.259298	1.94e-06	0.0397256
ACY3	cg14326354	-0.25924	1.95e-06	0.0399414
HLA-DPA1	cg14326354	-0.259201	1.96e-06	0.0400904
SMPD3	cg14326354	-0.259008	1.99e-06	0.0408249
PNPLA7	cg14326354	-0.259002	1.99e-06	0.040849
GABRA3	cg14326354	0.258909	2.01e-06	0.0412047
ZNF490	cg14326354	-0.258876	2.02e-06	0.0413355
IDUA	cg14326354	-0.25879	2.03e-06	0.0416704
PAGE1	cg14326354	0.25872	2.05e-06	0.0419454
ZMPSTE24	cg14326354	0.258607	2.07e-06	0.0423929
EFNA3	cg14326354	0.258598	2.07e-06	0.0424299
CCR2	cg14326354	-0.258579	2.07e-06	0.0425036
C4orf7	cg14326354	-0.258566	2.08e-06	0.0425577
KIAA0040	cg14326354	-0.258558	2.08e-06	0.0425871
CD81	cg14326354	-0.258516	2.09e-06	0.0427551
C4BPA	cg14326354	-0.258468	2.09e-06	0.0429479
CD69	cg14326354	-0.258449	2.1e-06	0.0430266
YEATS2	cg14326354	0.258443	2.1e-06	0.043051
CDCA4	cg14326354	0.25838	2.11e-06	0.0433073
SLC35A1	cg14326354	-0.258378	2.11e-06	0.0433126
SFRS13B	cg14326354	0.258359	2.12e-06	0.043391
CCL5	cg14326354	-0.258325	2.12e-06	0.0435306
GSN	cg14326354	-0.257961	2.2e-06	0.0450419
PDCL2	cg14326354	0.25791	2.21e-06	0.0452577
RIOK1	cg14326354	0.2579	2.21e-06	0.0452994
C15orf42	cg14326354	0.257861	2.22e-06	0.0454664
MAST3	cg14326354	-0.257828	2.22e-06	0.0456041
RRAS	cg14326354	-0.25773	2.24e-06	0.0460234
CENPF	cg14326354	0.257708	2.25e-06	0.0461216
SRL	cg14326354	-0.257616	2.27e-06	0.0465203
CD8A	cg14326354	-0.257591	2.27e-06	0.0466278
HLA-B	cg14326354	-0.257521	2.29e-06	0.046935
CDKN2AIP	cg14326354	-0.257508	2.29e-06	0.0469903
HLA-DPB1	cg14326354	-0.257422	2.31e-06	0.0473699
GAGE12J	cg14326354	0.257373	2.32e-06	0.0475857
TBCE	cg14326354	0.257347	2.33e-06	0.047702
MS4A2	cg14326354	-0.257334	2.33e-06	0.0477629
C8orf79	cg14326354	-0.257305	2.34e-06	0.0478923
KCNJ5	cg14326354	-0.2573	2.34e-06	0.0479145
ZNF639	cg14326354	0.257296	2.34e-06	0.0479299
LOC440905	cg14326354	0.25727	2.34e-06	0.0480482
AP2A2	cg14326354	-0.257248	2.35e-06	0.0481483
NOC2L	cg14326354	0.257193	2.36e-06	0.048395
LOC285830	cg14326354	-0.257144	2.37e-06	0.048617
NGFR	cg14326354	-0.257123	2.38e-06	0.0487131
NARS2	cg14326354	0.257023	2.4e-06	0.0491677
GAGE2D	cg14326354	0.257009	2.4e-06	0.0492319
MAX	cg14326354	-0.256865	2.43e-06	0.0498998
MCTP1	cg14326354	-0.256634	2.49e-06	0.0509853
RAC3	cg14326354	0.256592	2.5e-06	0.0511823
TPX2	cg14326354	0.25651	2.52e-06	0.0515769
RANBP3	cg14326354	-0.256509	2.52e-06	0.0515807
PSMB10	cg14326354	-0.256494	2.52e-06	0.0516514
LRRC31	cg14326354	-0.256469	2.53e-06	0.0517719
GSPT2	cg14326354	-0.256387	2.54e-06	0.0521711
KIF20A	cg14326354	0.256384	2.55e-06	0.0521867
FAM82A1	cg14326354	-0.256346	2.55e-06	0.0523683
ETS1	cg14326354	-0.256339	2.56e-06	0.0524018
TIMD4	cg14326354	-0.256319	2.56e-06	0.052502
C9orf100	cg14326354	0.256316	2.56e-06	0.0525188
TBC1D7	cg14326354	0.256295	2.57e-06	0.0526181
PTPRC	cg14326354	-0.2562	2.59e-06	0.0530867
PAPD7	cg14326354	0.256172	2.6e-06	0.0532242
PCDP1	cg14326354	-0.256137	2.6e-06	0.0533994
PYCR1	cg14326354	0.255987	2.64e-06	0.0541467
KLK2	cg14326354	0.255966	2.65e-06	0.0542525
KIAA0125	cg14326354	-0.255964	2.65e-06	0.0542646
ATAD5	cg14326354	0.255941	2.65e-06	0.0543787
PCDH20	cg14326354	-0.255868	2.67e-06	0.0547483
MAGEA1	cg14326354	0.255856	2.67e-06	0.0548121
MAST4	cg14326354	-0.255831	2.68e-06	0.0549365
PREX1	cg14326354	-0.25581	2.68e-06	0.0550436
TNIP1	cg14326354	-0.255757	2.7e-06	0.0553149
KLHL29	cg14326354	-0.255754	2.7e-06	0.0553339
SNX20	cg14326354	-0.255711	2.71e-06	0.055551
FADS2	cg14326354	0.255643	2.73e-06	0.0559075
CST3	cg14326354	-0.255597	2.74e-06	0.0561416
FMO5	cg14326354	-0.255489	2.77e-06	0.056708
DDX10	cg14326354	0.255365	2.8e-06	0.0573656
ERAP1	cg14326354	-0.255329	2.81e-06	0.0575574
DGKA	cg14326354	-0.255326	2.81e-06	0.057572
SLC46A2	cg14326354	-0.255326	2.81e-06	0.0575738
NCAPG	cg14326354	0.255253	2.83e-06	0.0579656
PHF13	cg14326354	0.255117	2.86e-06	0.0586978
B3GNT4	cg14326354	0.255065	2.88e-06	0.0589791
IGF2BP3	cg14326354	0.255029	2.89e-06	0.0591758
TGFB1	cg14326354	-0.255026	2.89e-06	0.0591956
A2LD1	cg14326354	-0.254987	2.9e-06	0.0594085
CCNB1	cg14326354	0.25489	2.92e-06	0.0599422
CDHR1	cg14326354	-0.254875	2.93e-06	0.0600283
FCRL6	cg14326354	-0.254739	2.96e-06	0.0607846
A2M	cg14326354	-0.254681	2.98e-06	0.0611153
LOC100132707	cg14326354	-0.254628	3e-06	0.061412
POLR3GL	cg14326354	-0.254621	3e-06	0.0614539
PFDN6	cg14326354	0.25462	3e-06	0.0614561
MDC1	cg14326354	0.254607	3e-06	0.0615333
PHTF2	cg14326354	0.254547	3.02e-06	0.0618733
IL18R1	cg14326354	-0.254488	3.03e-06	0.0622116
TXNIP	cg14326354	-0.254473	3.04e-06	0.0622971
PTPRT	cg14326354	-0.254322	3.08e-06	0.0631756
POU3F1	cg14326354	-0.254237	3.11e-06	0.0636689
SAMD9L	cg14326354	-0.254203	3.12e-06	0.0638726
RAB27A	cg14326354	-0.254156	3.13e-06	0.064149
BTN3A1	cg14326354	-0.254152	3.13e-06	0.0641685
MPHOSPH8	cg14326354	-0.254098	3.15e-06	0.0644896
TRPM4	cg14326354	-0.254085	3.15e-06	0.0645674
CDC25A	cg14326354	0.254059	3.16e-06	0.064726
LIME1	cg14326354	-0.254002	3.17e-06	0.0650633
NDUFAF1	cg14326354	-0.253849	3.22e-06	0.0659903
ARHGAP27	cg14326354	-0.253702	3.26e-06	0.0668866
CLINT1	cg14326354	-0.253592	3.3e-06	0.0675684
GPR174	cg14326354	-0.253521	3.32e-06	0.0680086
NHEJ1	cg14326354	-0.253444	3.34e-06	0.0684933
C20orf20	cg14326354	0.253394	3.36e-06	0.0688092
TTYH2	cg14326354	-0.253384	3.36e-06	0.0688719
CPNE5	cg14326354	-0.253321	3.38e-06	0.069269
IFITM2	cg14326354	-0.253303	3.38e-06	0.0693872
ETV7	cg14326354	-0.253268	3.4e-06	0.069613
RTN4RL1	cg14326354	-0.253251	3.4e-06	0.0697178
TSPAN1	cg14326354	-0.253227	3.41e-06	0.0698734
PPP2R1B	cg14326354	0.253125	3.44e-06	0.0705291
CNOT6L	cg14326354	-0.253041	3.47e-06	0.0710764
SQRDL	cg14326354	-0.253003	3.48e-06	0.0713221
SLC6A12	cg14326354	-0.252989	3.48e-06	0.0714187
ARHGDIB	cg14326354	-0.252885	3.52e-06	0.0721034
HCP5	cg14326354	-0.252877	3.52e-06	0.0721558
CDKN3	cg14326354	0.252749	3.56e-06	0.0730073
CDCP1	cg14326354	-0.252691	3.58e-06	0.0733937
GPC2	cg14326354	0.252675	3.59e-06	0.0735009
NDC80	cg14326354	0.252533	3.63e-06	0.0744662
BUB1B	cg14326354	0.25251	3.64e-06	0.0746196
LOC144486	cg14326354	0.252415	3.67e-06	0.0752702
RNF125	cg14326354	-0.252411	3.67e-06	0.0753012
TIGIT	cg14326354	-0.25238	3.68e-06	0.0755124
PTGDR	cg14326354	-0.252336	3.7e-06	0.0758172
DMRTB1	cg14326354	0.252314	3.71e-06	0.0759716
C8orf80	cg14326354	-0.252311	3.71e-06	0.0759962
UFSP2	cg14326354	-0.252202	3.74e-06	0.0767563
FOXRED1	cg14326354	0.252131	3.77e-06	0.0772567
SFTPB	cg14326354	-0.252119	3.77e-06	0.0773366
CLTB	cg14326354	-0.252103	3.78e-06	0.077449
TMEM144	cg14326354	-0.252048	3.8e-06	0.0778398
CD28	cg14326354	-0.251999	3.81e-06	0.0781901
EIF2B3	cg14326354	0.251998	3.81e-06	0.0782006
LAX1	cg14326354	-0.251982	3.82e-06	0.078311
CT47A6	cg14326354	0.251932	3.84e-06	0.078674
NEK1	cg14326354	-0.25189	3.85e-06	0.0789716
MEF2C	cg14326354	-0.251862	3.86e-06	0.0791795
GPR137C	cg14326354	0.251832	3.87e-06	0.0793947
LRRC1	cg14326354	0.251832	3.87e-06	0.0793967
RICTOR	cg14326354	0.251817	3.88e-06	0.0795025
ARRDC4	cg14326354	-0.251757	3.9e-06	0.079939
PTPN7	cg14326354	-0.251713	3.91e-06	0.0802595
FEM1C	cg14326354	-0.25167	3.93e-06	0.0805776
ACSL5	cg14326354	-0.251667	3.93e-06	0.0805966
RAD51AP1	cg14326354	0.251666	3.93e-06	0.080608
FEM1A	cg14326354	-0.251663	3.93e-06	0.0806282
BUB1	cg14326354	0.251631	3.94e-06	0.080865
KIF14	cg14326354	0.25162	3.95e-06	0.0809474
MRPS17	cg14326354	0.251584	3.96e-06	0.0812114
ARHGAP9	cg14326354	-0.251573	3.97e-06	0.0812906
DOK7	cg14326354	-0.25154	3.98e-06	0.0815404
FBXO7	cg14326354	-0.25153	3.98e-06	0.081609
CA2	cg14326354	-0.25146	4.01e-06	0.0821356
IRF1	cg14326354	-0.251296	4.07e-06	0.0833699
SEMA4D	cg14326354	-0.251267	4.08e-06	0.0835928
EZH2	cg14326354	0.251263	4.08e-06	0.0836216
GLI1	cg14326354	-0.251214	4.1e-06	0.0839961
LZIC	cg14326354	0.251158	4.12e-06	0.0844286
HSD17B11	cg14326354	-0.251148	4.12e-06	0.0845005
ANKRD44	cg14326354	-0.251084	4.15e-06	0.0849964
C7orf11	cg14326354	0.250997	4.18e-06	0.0856744
VRK1	cg14326354	0.2509	4.22e-06	0.0864297
PPP2R5D	cg14326354	0.250767	4.27e-06	0.087482
KIF4A	cg14326354	0.250766	4.27e-06	0.087493
TPSB2	cg14326354	-0.250748	4.27e-06	0.0876328
CALU	cg14326354	0.250736	4.28e-06	0.0877271
ZCCHC17	cg14326354	0.250646	4.31e-06	0.0884498
EBNA1BP2	cg14326354	0.250617	4.33e-06	0.0886809
CNTN2	cg14326354	-0.25046	4.39e-06	0.0899618
ALDH16A1	cg14326354	-0.250423	4.4e-06	0.0902578
TBX21	cg14326354	-0.25038	4.42e-06	0.0906119
CCNDBP1	cg14326354	-0.250351	4.43e-06	0.0908514
SPC24	cg14326354	0.250286	4.46e-06	0.0913883
FGD2	cg14326354	-0.250166	4.51e-06	0.0923892
ELF1	cg14326354	-0.250163	4.51e-06	0.0924173
HLA-C	cg14326354	-0.250075	4.54e-06	0.093152
GIMAP8	cg14326354	-0.249923	4.61e-06	0.0944452
TLR2	cg14326354	-0.249908	4.61e-06	0.0945745
MTFR1	cg14326354	0.249743	4.68e-06	0.0959949
PSTPIP1	cg14326354	-0.249618	4.74e-06	0.0970942
P2RY8	cg14326354	-0.249564	4.76e-06	0.0975705
POFUT1	cg14326354	0.24953	4.77e-06	0.0978643
MAP6	cg14326354	-0.249489	4.79e-06	0.0982322
ATP10B	cg14326354	-0.249409	4.83e-06	0.0989463
RANBP1	cg14326354	0.249403	4.83e-06	0.0989943
LOC100128640	cg14326354	0.249397	4.83e-06	0.0990521
MTPAP	cg14326354	0.249353	4.85e-06	0.0994448
MELK	cg14326354	0.249326	4.86e-06	0.0996925
TNXB	cg14326354	-0.249259	4.89e-06	0.100289
FCRL1	cg14326354	-0.249251	4.9e-06	0.100362
HLF	cg14326354	-0.249201	4.92e-06	0.100821
CCL15	cg14326354	-0.249158	4.94e-06	0.101212
TH1L	cg14326354	0.249099	4.96e-06	0.101752
HNF4A	cg14326354	-0.249002	5.01e-06	0.102644
XPC	cg14326354	-0.248992	5.01e-06	0.10274
HDHD2	cg14326354	-0.248963	5.02e-06	0.103014
CHRDL1	cg14326354	-0.248961	5.03e-06	0.103032
TAF4	cg14326354	0.248931	5.04e-06	0.103312
RABL2A	cg14326354	-0.248903	5.05e-06	0.103572
GNL2	cg14326354	0.248848	5.08e-06	0.104086
DPF3	cg14326354	-0.248845	5.08e-06	0.10411
KIF11	cg14326354	0.248806	5.1e-06	0.104477
CSF2RB	cg14326354	-0.24875	5.12e-06	0.10501
STIL	cg14326354	0.248747	5.12e-06	0.105034
THG1L	cg14326354	-0.248657	5.17e-06	0.10589
MCM7	cg14326354	0.24861	5.19e-06	0.10634
CX3CR1	cg14326354	-0.248606	5.19e-06	0.106375
GPR158	cg14326354	0.248559	5.21e-06	0.106834
PFKFB4	cg14326354	0.248484	5.25e-06	0.10755
CXCL14	cg14326354	-0.248484	5.25e-06	0.107551
SLFN12L	cg14326354	-0.24847	5.25e-06	0.107685
SNRNP40	cg14326354	0.248363	5.3e-06	0.108729
PTGER4	cg14326354	-0.248335	5.32e-06	0.109007
TCFL5	cg14326354	0.248296	5.34e-06	0.10939
DPM1	cg14326354	0.248239	5.36e-06	0.109955
INPP5D	cg14326354	-0.248234	5.37e-06	0.110002
C17orf58	cg14326354	0.248229	5.37e-06	0.110051
PIK3C2B	cg14326354	-0.248151	5.41e-06	0.110822
CD59	cg14326354	-0.248107	5.43e-06	0.111263
DHRS9	cg14326354	-0.248039	5.46e-06	0.111948
AES	cg14326354	-0.247984	5.49e-06	0.112501
FBXL17	cg14326354	-0.247893	5.53e-06	0.113429
CD180	cg14326354	-0.247858	5.55e-06	0.113779
RECQL4	cg14326354	0.247841	5.56e-06	0.113954
MGAT3	cg14326354	-0.247813	5.57e-06	0.114247
RDM1	cg14326354	0.247752	5.6e-06	0.11487
TCL1A	cg14326354	-0.247741	5.61e-06	0.114983
VRK3	cg14326354	-0.247701	5.63e-06	0.115393
FCRL4	cg14326354	-0.247661	5.65e-06	0.115815
DNAJB6	cg14326354	0.24765	5.65e-06	0.115925
TNFRSF8	cg14326354	-0.247598	5.68e-06	0.116467
IL2RB	cg14326354	-0.2475	5.73e-06	0.117495
RPS2P32	cg14326354	0.247492	5.74e-06	0.117578
CDH18	cg14326354	0.247392	5.79e-06	0.118637
CENPL	cg14326354	0.247288	5.84e-06	0.119746
TRIM35	cg14326354	-0.247226	5.87e-06	0.12041
RAD51	cg14326354	0.247225	5.87e-06	0.120426
TSPAN8	cg14326354	-0.247184	5.9e-06	0.120871
TCN1	cg14326354	-0.247152	5.91e-06	0.121211
RABL2B	cg14326354	-0.247074	5.95e-06	0.12207
MMP7	cg14326354	-0.246923	6.04e-06	0.123726
CENPW	cg14326354	0.246891	6.05e-06	0.124079
HPGD	cg14326354	-0.246872	6.06e-06	0.124296
C2orf14	cg14326354	0.246751	6.13e-06	0.125649
IL12RB1	cg14326354	-0.246594	6.22e-06	0.127421
MGAT1	cg14326354	-0.246584	6.22e-06	0.127532
ZNF492	cg14326354	0.246561	6.23e-06	0.127792
MESP2	cg14326354	0.246484	6.28e-06	0.128671
MSH6	cg14326354	0.246473	6.28e-06	0.1288
HLA-DRB1	cg14326354	-0.24641	6.32e-06	0.129534
F2RL1	cg14326354	-0.246384	6.33e-06	0.129829
E2F2	cg14326354	0.246231	6.42e-06	0.131617
BTK	cg14326354	-0.246218	6.43e-06	0.131769
MRPS21	cg14326354	0.24621	6.43e-06	0.131857
PYGO2	cg14326354	0.246177	6.45e-06	0.132249
CD82	cg14326354	-0.246171	6.45e-06	0.132318
MYT1L	cg14326354	0.246168	6.46e-06	0.132355
C12orf48	cg14326354	0.246166	6.46e-06	0.132373
MECOM	cg14326354	-0.246124	6.48e-06	0.132878
C10orf54	cg14326354	-0.246087	6.5e-06	0.133309
C9orf152	cg14326354	-0.24601	6.55e-06	0.134238
INPP5K	cg14326354	-0.245967	6.57e-06	0.134741
H2AFV	cg14326354	0.245891	6.62e-06	0.135666
SAMD9	cg14326354	-0.245778	6.68e-06	0.13704
NFS1	cg14326354	0.245777	6.68e-06	0.137048
TAPBP	cg14326354	-0.245636	6.77e-06	0.138776
C1orf109	cg14326354	0.245597	6.79e-06	0.139255
DENND1C	cg14326354	-0.245583	6.8e-06	0.139437
C2orf85	cg14326354	-0.245525	6.84e-06	0.140158
HLA-J	cg14326354	-0.245477	6.87e-06	0.140757
NUSAP1	cg14326354	0.245468	6.87e-06	0.140865
LOC100127888	cg14326354	-0.245262	7e-06	0.143461
CXCR6	cg14326354	-0.24526	7e-06	0.143489
HLA-DMA	cg14326354	-0.245121	7.09e-06	0.145278
CD1D	cg14326354	-0.245076	7.11e-06	0.145853
STAT4	cg14326354	-0.245057	7.13e-06	0.1461
RLN3	cg14326354	0.24499	7.17e-06	0.146967
PLA2G10	cg14326354	-0.244986	7.17e-06	0.147019
CARD6	cg14326354	-0.244979	7.18e-06	0.147111
PRMT5	cg14326354	0.244974	7.18e-06	0.14718
PTPN13	cg14326354	-0.244957	7.19e-06	0.147399
RNASE4	cg14326354	-0.244864	7.25e-06	0.148623
LOC121952	cg14326354	-0.244819	7.28e-06	0.149219
SAPS2	cg14326354	-0.244817	7.28e-06	0.149244
FAT4	cg14326354	-0.244778	7.31e-06	0.149765
KIAA1524	cg14326354	0.244732	7.33e-06	0.150368
CEP120	cg14326354	-0.244682	7.37e-06	0.151038
C17orf53	cg14326354	0.244622	7.41e-06	0.151851
LPXN	cg14326354	-0.244616	7.41e-06	0.151932
CCL14	cg14326354	-0.244569	7.44e-06	0.152565
JAKMIP1	cg14326354	-0.244424	7.54e-06	0.154533
NUDT1	cg14326354	0.244375	7.57e-06	0.155202
SPINK5	cg14326354	-0.244313	7.61e-06	0.156062
CR2	cg14326354	-0.244282	7.63e-06	0.156484
LTBP4	cg14326354	-0.244263	7.65e-06	0.156742
RCBTB2	cg14326354	-0.244242	7.66e-06	0.157038
BANF1	cg14326354	0.244058	7.79e-06	0.159612
SNTG2	cg14326354	-0.243892	7.9e-06	0.161977
GANC	cg14326354	-0.243878	7.91e-06	0.162173
PIK3CD	cg14326354	-0.243875	7.91e-06	0.162217
DEPDC1B	cg14326354	0.243863	7.92e-06	0.162382
UBE2K	cg14326354	0.243848	7.93e-06	0.162598
SLC16A11	cg14326354	-0.243738	8.01e-06	0.16419
GHR	cg14326354	-0.243707	8.03e-06	0.164645
ZNF98	cg14326354	0.243702	8.03e-06	0.164706
SGOL1	cg14326354	0.243637	8.08e-06	0.165663
TSPAN32	cg14326354	-0.243635	8.08e-06	0.165692
ADAMTSL3	cg14326354	-0.243632	8.08e-06	0.165733
COL6A6	cg14326354	-0.243608	8.1e-06	0.166089
KAT2B	cg14326354	-0.243604	8.1e-06	0.166137
SC65	cg14326354	0.243526	8.16e-06	0.167282
IFI16	cg14326354	-0.243499	8.18e-06	0.167691
LGR6	cg14326354	-0.243488	8.19e-06	0.16785
ZNF658	cg14326354	-0.243475	8.2e-06	0.168041
HSD17B4	cg14326354	-0.243443	8.22e-06	0.168519
PLCB1	cg14326354	0.243266	8.35e-06	0.171169
DNAJC21	cg14326354	0.243157	8.43e-06	0.17282
KIAA1045	cg14326354	-0.243101	8.47e-06	0.173674
DSCR4	cg14326354	0.243034	8.52e-06	0.17469
C15orf59	cg14326354	-0.243009	8.54e-06	0.175078
CDKL1	cg14326354	-0.242958	8.58e-06	0.175862
CNPY1	cg14326354	-0.242945	8.59e-06	0.176072
GGTA1	cg14326354	-0.24291	8.61e-06	0.176612
CLEC2L	cg14326354	0.242847	8.66e-06	0.177595
SDK2	cg14326354	-0.242785	8.71e-06	0.178568
PARP15	cg14326354	-0.242784	8.71e-06	0.178576
RPS27L	cg14326354	-0.242766	8.72e-06	0.178858
DUOX2	cg14326354	-0.2426	8.85e-06	0.18148
MSH2	cg14326354	0.242598	8.85e-06	0.181525
ELOVL5	cg14326354	0.242564	8.88e-06	0.18206
GPR156	cg14326354	0.242562	8.88e-06	0.1821
PLEKHA6	cg14326354	-0.242544	8.9e-06	0.18238
SEMA5B	cg14326354	0.242505	8.93e-06	0.183007
LOC728819	cg14326354	0.242284	9.1e-06	0.186585
KIF18B	cg14326354	0.242237	9.14e-06	0.187366
NCAM2	cg14326354	-0.242161	9.2e-06	0.188607
SOAT2	cg14326354	-0.242081	9.26e-06	0.189933
TCF21	cg14326354	-0.242072	9.27e-06	0.190087
SLPI	cg14326354	-0.242039	9.3e-06	0.190631
MORF4L2	cg14326354	0.242019	9.32e-06	0.190977
CAPN6	cg14326354	-0.241987	9.34e-06	0.191513
MSX2P1	cg14326354	-0.241887	9.42e-06	0.193187
MCM6	cg14326354	0.24177	9.52e-06	0.195174
WIPI2	cg14326354	0.241751	9.54e-06	0.195511
FADS1	cg14326354	0.241731	9.55e-06	0.195853
ALPK1	cg14326354	-0.241649	9.62e-06	0.197263
DSCR8	cg14326354	0.241645	9.63e-06	0.19733
KCNA3	cg14326354	-0.241592	9.67e-06	0.198253
SLC16A7	cg14326354	-0.241504	9.74e-06	0.199769
CDCA5	cg14326354	0.241471	9.77e-06	0.200348
ISG20	cg14326354	-0.241446	9.79e-06	0.200786
RTN1	cg14326354	-0.241278	9.94e-06	0.203755
GABPB1	cg14326354	0.241271	9.94e-06	0.20388
FAM43A	cg14326354	-0.241188	1e-05	0.205362
MBNL3	cg14326354	-0.24108	1.01e-05	0.207315
GMPR	cg14326354	-0.24105	1.01e-05	0.207859
HEATR2	cg14326354	0.241036	1.02e-05	0.208114
C20orf11	cg14326354	0.240993	1.02e-05	0.208885
C6orf138	cg14326354	-0.240939	1.02e-05	0.209874
DEM1	cg14326354	0.240925	1.02e-05	0.210134
LPAR5	cg14326354	-0.240915	1.03e-05	0.21032
ANLN	cg14326354	0.240883	1.03e-05	0.210892
C5orf41	cg14326354	-0.240769	1.04e-05	0.212998
SIGLEC6	cg14326354	-0.240744	1.04e-05	0.21348
LSM2	cg14326354	0.240729	1.04e-05	0.213743
AIMP2	cg14326354	0.240695	1.05e-05	0.214387
DUOXA2	cg14326354	-0.24063	1.05e-05	0.215605
TIGD3	cg14326354	0.240591	1.06e-05	0.216344
ERCC6L	cg14326354	0.240551	1.06e-05	0.217083
DBF4	cg14326354	0.240478	1.07e-05	0.218478
KLF12	cg14326354	-0.24044	1.07e-05	0.219191
RGS9	cg14326354	-0.240363	1.08e-05	0.220668
CTSD	cg14326354	-0.240244	1.09e-05	0.222964
SLC15A3	cg14326354	-0.240242	1.09e-05	0.222996
C5orf51	cg14326354	0.240227	1.09e-05	0.223289
TBC1D2	cg14326354	-0.24007	1.1e-05	0.226358
INA	cg14326354	0.240055	1.11e-05	0.226653
FAH	cg14326354	-0.240054	1.11e-05	0.226669
CDK16	cg14326354	0.24003	1.11e-05	0.227146
ZBTB46	cg14326354	-0.239996	1.11e-05	0.227811
ASPM	cg14326354	0.239996	1.11e-05	0.227821
TNNI3K	cg14326354	-0.239951	1.12e-05	0.228712
TNFRSF13C	cg14326354	-0.23995	1.12e-05	0.228735
CAMK4	cg14326354	-0.239911	1.12e-05	0.229508
ENPP6	cg14326354	-0.239885	1.12e-05	0.230019
FZD6	cg14326354	0.239852	1.13e-05	0.230683
APOL2	cg14326354	-0.239734	1.14e-05	0.233051
OTX2	cg14326354	0.239701	1.14e-05	0.233735
TUBG1	cg14326354	0.239663	1.14e-05	0.234498
AGAP2	cg14326354	-0.239558	1.15e-05	0.236638
VPS13C	cg14326354	-0.23954	1.16e-05	0.237012
PAXIP1	cg14326354	0.239439	1.17e-05	0.239086
SFTPC	cg14326354	-0.239419	1.17e-05	0.239503
TNFSF13B	cg14326354	-0.239305	1.18e-05	0.24188
ACTL6A	cg14326354	0.239207	1.19e-05	0.243945
LARGE	cg14326354	-0.239166	1.19e-05	0.24482
C9orf125	cg14326354	-0.239122	1.2e-05	0.245736
TNFRSF17	cg14326354	-0.239121	1.2e-05	0.245773
C17orf87	cg14326354	-0.238998	1.21e-05	0.248404
FASLG	cg14326354	-0.238987	1.21e-05	0.248632
PARP16	cg14326354	-0.238898	1.22e-05	0.250547
NMU	cg14326354	0.238861	1.23e-05	0.251351
TUFT1	cg14326354	0.238855	1.23e-05	0.251482
NIPAL3	cg14326354	-0.238809	1.23e-05	0.252488
BIVM	cg14326354	-0.238806	1.23e-05	0.252541
JPH4	cg14326354	-0.238546	1.26e-05	0.258291
MRPL36	cg14326354	0.238539	1.26e-05	0.258438
LMO2	cg14326354	-0.238512	1.26e-05	0.259041
SP8	cg14326354	0.238428	1.27e-05	0.260934
MASTL	cg14326354	0.238389	1.28e-05	0.261798
ADAM17	cg14326354	0.238387	1.28e-05	0.261861
C4orf6	cg14326354	0.238369	1.28e-05	0.262267
MAN2B1	cg14326354	-0.238291	1.29e-05	0.264016
PGCP	cg14326354	-0.238277	1.29e-05	0.26435
MGC72080	cg14326354	0.238253	1.29e-05	0.26489
GNG2	cg14326354	-0.238238	1.29e-05	0.265236
GABRP	cg14326354	-0.238233	1.29e-05	0.265352
DNM2	cg14326354	-0.238158	1.3e-05	0.26706
CNGA4	cg14326354	-0.238147	1.3e-05	0.267332
AMICA1	cg14326354	-0.238123	1.31e-05	0.267874
CD3G	cg14326354	-0.238109	1.31e-05	0.268206
PAQR8	cg14326354	-0.238097	1.31e-05	0.268483
ARHGAP30	cg14326354	-0.238069	1.31e-05	0.26912
ABCA9	cg14326354	-0.238051	1.31e-05	0.269551
TBC1D2B	cg14326354	-0.237707	1.35e-05	0.277633
GTF3C2	cg14326354	0.237663	1.36e-05	0.278694
ABI3	cg14326354	-0.237618	1.36e-05	0.279766
KLHL5	cg14326354	0.237613	1.37e-05	0.279901
AOAH	cg14326354	-0.237589	1.37e-05	0.280459
HJURP	cg14326354	0.237547	1.37e-05	0.281491
GAGE2B	cg14326354	0.237518	1.38e-05	0.282189
CXorf57	cg14326354	-0.237465	1.38e-05	0.283483
LDLR	cg14326354	-0.237431	1.39e-05	0.284304
CNR1	cg14326354	-0.23738	1.39e-05	0.285549
IKBKB	cg14326354	-0.237354	1.4e-05	0.286185
NRSN2	cg14326354	0.237276	1.41e-05	0.288112
IL10RA	cg14326354	-0.237256	1.41e-05	0.288615
HERPUD1	cg14326354	-0.237175	1.42e-05	0.290626
FOXJ3	cg14326354	0.237134	1.42e-05	0.291652
ZNF189	cg14326354	-0.237105	1.43e-05	0.292365
RILPL2	cg14326354	-0.236983	1.44e-05	0.295447
DIO3	cg14326354	-0.236982	1.44e-05	0.295465
KIAA1430	cg14326354	-0.236978	1.44e-05	0.295559
ZDHHC3	cg14326354	-0.236935	1.45e-05	0.296662
DIAPH3	cg14326354	0.236907	1.45e-05	0.297375
ACSM5	cg14326354	-0.236902	1.45e-05	0.297508
FOXD4L2	cg14326354	-0.236874	1.45e-05	0.298213
MATK	cg14326354	-0.236842	1.46e-05	0.299023
PRR11	cg14326354	0.236832	1.46e-05	0.299276
TSPYL1	cg14326354	-0.236807	1.46e-05	0.299935
LOC400931	cg14326354	-0.236769	1.47e-05	0.300895
SHC2	cg14326354	-0.236714	1.47e-05	0.302318
MEI1	cg14326354	-0.236687	1.48e-05	0.303026
PEBP4	cg14326354	-0.236576	1.49e-05	0.305906
NCF4	cg14326354	-0.236529	1.5e-05	0.307161
FAM134B	cg14326354	-0.236387	1.52e-05	0.310906
GCM1	cg14326354	0.236349	1.52e-05	0.311925
C13orf30	cg14326354	-0.236338	1.52e-05	0.312204
AGPAT4	cg14326354	-0.236314	1.53e-05	0.312843
STAMBPL1	cg14326354	-0.236208	1.54e-05	0.315692
XPO5	cg14326354	0.236205	1.54e-05	0.315783
PLAC1	cg14326354	0.236196	1.54e-05	0.31601
BACE2	cg14326354	-0.23618	1.54e-05	0.316452
GRM7	cg14326354	-0.236156	1.55e-05	0.317104
GRIN3A	cg14326354	-0.236041	1.56e-05	0.320237
PRG4	cg14326354	-0.235982	1.57e-05	0.321844
WAS	cg14326354	-0.235955	1.57e-05	0.322588
TMEM48	cg14326354	0.235771	1.6e-05	0.327675
ZC3HC1	cg14326354	0.235762	1.6e-05	0.327928
HCST	cg14326354	-0.235728	1.6e-05	0.328881
TDRKH	cg14326354	0.235624	1.62e-05	0.331828
C2orf48	cg14326354	0.235547	1.63e-05	0.33401
RPS6KC1	cg14326354	0.235474	1.64e-05	0.336085
GRRP1	cg14326354	-0.235444	1.64e-05	0.336938
PIK3CG	cg14326354	-0.235391	1.65e-05	0.338472
PRAME	cg14326354	0.235345	1.66e-05	0.339796
GALNT12	cg14326354	-0.235276	1.67e-05	0.341795
CXCL13	cg14326354	-0.235086	1.69e-05	0.34735
CCDC152	cg14326354	-0.235061	1.7e-05	0.348101
AMPD1	cg14326354	-0.235055	1.7e-05	0.348266
ARL3	cg14326354	0.234996	1.71e-05	0.350031
IFT27	cg14326354	-0.234948	1.71e-05	0.351446
C5orf28	cg14326354	0.234915	1.72e-05	0.352442
KIRREL3	cg14326354	-0.234865	1.73e-05	0.353954
PAGE2	cg14326354	0.234792	1.74e-05	0.356156
STRA8	cg14326354	0.234772	1.74e-05	0.356761
FASTKD3	cg14326354	0.234769	1.74e-05	0.356853
FAM49B	cg14326354	0.234755	1.74e-05	0.35726
CHI3L1	cg14326354	-0.234738	1.75e-05	0.357792
C4orf41	cg14326354	-0.234726	1.75e-05	0.358146
FBXO5	cg14326354	0.234671	1.76e-05	0.359833
SERPINB8	cg14326354	-0.234654	1.76e-05	0.360343
IHH	cg14326354	-0.234621	1.76e-05	0.361358
ITIH2	cg14326354	-0.234537	1.78e-05	0.363927
ARHGAP31	cg14326354	-0.234534	1.78e-05	0.364022
CNGB3	cg14326354	0.234522	1.78e-05	0.364393
ADH1C	cg14326354	-0.234446	1.79e-05	0.366764
F8	cg14326354	-0.234425	1.79e-05	0.367418
CPEB4	cg14326354	-0.234395	1.8e-05	0.368349
MYCNOS	cg14326354	0.234291	1.81e-05	0.3716
PLXNB2	cg14326354	-0.234258	1.82e-05	0.372632
RAMP3	cg14326354	-0.234255	1.82e-05	0.372725
NTRK1	cg14326354	-0.234243	1.82e-05	0.373116
CALCOCO2	cg14326354	-0.234218	1.82e-05	0.373902
GIP	cg14326354	0.234182	1.83e-05	0.375044
ACVR2B	cg14326354	0.234181	1.83e-05	0.375075
IL8	cg14326354	0.234165	1.83e-05	0.375586
CHCHD8	cg14326354	0.234121	1.84e-05	0.376981
IBSP	cg14326354	0.234108	1.84e-05	0.377395
AGFG2	cg14326354	-0.234036	1.85e-05	0.379721
CAPN3	cg14326354	-0.233891	1.87e-05	0.384388
SGMS2	cg14326354	-0.23385	1.88e-05	0.385731
CCNH	cg14326354	-0.233789	1.89e-05	0.387719
ATP10D	cg14326354	-0.233738	1.9e-05	0.389386
KY	cg14326354	-0.2336	1.92e-05	0.393967
ANXA10	cg14326354	-0.23359	1.92e-05	0.394283
UGT2B15	cg14326354	-0.233587	1.92e-05	0.394387
SETDB2	cg14326354	-0.23357	1.93e-05	0.394961
UBE2V1	cg14326354	0.233534	1.93e-05	0.396179
RNF26	cg14326354	0.233488	1.94e-05	0.397694
KDELR2	cg14326354	0.233483	1.94e-05	0.397893
DMXL1	cg14326354	-0.233456	1.95e-05	0.398797
EMX1	cg14326354	-0.233451	1.95e-05	0.398957
LOC100130776	cg14326354	-0.233403	1.95e-05	0.400558
FMN1	cg14326354	-0.233273	1.98e-05	0.404988
EFCAB6	cg14326354	-0.233257	1.98e-05	0.405546
CCNA2	cg14326354	0.233256	1.98e-05	0.405565
CRTAM	cg14326354	-0.233126	2e-05	0.410048
HLA-L	cg14326354	-0.2331	2e-05	0.410947
FAM116B	cg14326354	-0.23306	2.01e-05	0.412323
RPRD1B	cg14326354	0.232954	2.03e-05	0.416018
LOC339524	cg14326354	-0.232942	2.03e-05	0.41643
PCDH1	cg14326354	-0.232848	2.05e-05	0.419736
MAD2L2	cg14326354	0.232805	2.05e-05	0.421259
MGC27382	cg14326354	-0.232714	2.07e-05	0.424527
MRPL47	cg14326354	0.232709	2.07e-05	0.424697
PNMA5	cg14326354	0.23264	2.08e-05	0.427166
ALG8	cg14326354	0.232599	2.09e-05	0.428632
CKAP2L	cg14326354	0.232584	2.09e-05	0.429185
FAM171A1	cg14326354	-0.232551	2.1e-05	0.430355
CTSG	cg14326354	-0.232543	2.1e-05	0.430655
ANKRD24	cg14326354	-0.232539	2.1e-05	0.430794
SPATA3	cg14326354	0.232533	2.1e-05	0.431029
GNL3	cg14326354	0.232517	2.11e-05	0.431599
HIST1H2AL	cg14326354	0.232503	2.11e-05	0.43212
PCDHGB2	cg14326354	-0.23249	2.11e-05	0.432593
BRDT	cg14326354	0.23233	2.14e-05	0.438427
CD226	cg14326354	-0.232231	2.16e-05	0.442083
CDC25C	cg14326354	0.232221	2.16e-05	0.442482
HLA-A	cg14326354	-0.232193	2.16e-05	0.443523
RAD21	cg14326354	0.232176	2.17e-05	0.444137
ACADL	cg14326354	-0.23217	2.17e-05	0.444373
ART5	cg14326354	0.232041	2.19e-05	0.449193
E2F8	cg14326354	0.232039	2.19e-05	0.44926
LINS1	cg14326354	-0.231992	2.2e-05	0.451047
ERMAP	cg14326354	-0.231966	2.2e-05	0.452016
PKHD1L1	cg14326354	-0.231809	2.23e-05	0.458006
METTL12	cg14326354	0.231797	2.24e-05	0.458487
GEMIN6	cg14326354	0.231773	2.24e-05	0.459417
KLHDC3	cg14326354	0.231767	2.24e-05	0.45964
CSNK2B	cg14326354	0.231761	2.24e-05	0.459862
GAGE8	cg14326354	0.231607	2.27e-05	0.465843
SKA3	cg14326354	0.231529	2.29e-05	0.468897
ZBP1	cg14326354	-0.231468	2.3e-05	0.471274
BEGAIN	cg14326354	-0.231441	2.3e-05	0.472354
SAPS3	cg14326354	0.231378	2.32e-05	0.474858
SLC39A1	cg14326354	0.231309	2.33e-05	0.477588
FXC1	cg14326354	-0.231285	2.33e-05	0.478531
NCKAP1L	cg14326354	-0.231274	2.34e-05	0.479011
ABCA6	cg14326354	-0.231081	2.37e-05	0.486792
DUSP18	cg14326354	-0.231057	2.38e-05	0.487748
CCDC150	cg14326354	0.231054	2.38e-05	0.48788
GFRA2	cg14326354	-0.231032	2.38e-05	0.488789
CD200R1	cg14326354	-0.230983	2.39e-05	0.490796
INMT	cg14326354	-0.230978	2.39e-05	0.490981
OAS2	cg14326354	-0.230968	2.4e-05	0.491386
PRC1	cg14326354	0.230931	2.4e-05	0.49291
TOP2A	cg14326354	0.23092	2.41e-05	0.493344
CENPO	cg14326354	0.230919	2.41e-05	0.493388
C1R	cg14326354	-0.230857	2.42e-05	0.495981
ADRA2A	cg14326354	-0.230838	2.42e-05	0.496749
RAB43	cg14326354	-0.2308	2.43e-05	0.498342
GZMA	cg14326354	-0.230789	2.43e-05	0.498791
ZMYND15	cg14326354	-0.230782	2.43e-05	0.499075
KCNQ1	cg14326354	-0.230776	2.44e-05	0.499318
MAGEC1	cg14326354	0.230761	2.44e-05	0.499939
PARL	cg14326354	0.230746	2.44e-05	0.500557
MCC	cg14326354	-0.230717	2.45e-05	0.501771
TIAL1	cg14326354	0.230688	2.45e-05	0.503011
FKBPL	cg14326354	0.230657	2.46e-05	0.504313
CDYL2	cg14326354	-0.230656	2.46e-05	0.504346
RACGAP1	cg14326354	0.230641	2.46e-05	0.50496
NPL	cg14326354	-0.230631	2.47e-05	0.505413
TAF5	cg14326354	0.230614	2.47e-05	0.506124
C8orf76	cg14326354	0.230596	2.47e-05	0.506882
KIAA0513	cg14326354	-0.230559	2.48e-05	0.508423
SSU72	cg14326354	0.230535	2.48e-05	0.509449
GAGE13	cg14326354	0.230506	2.49e-05	0.510705
PRPF3	cg14326354	0.230452	2.5e-05	0.513
ACTR3B	cg14326354	0.23039	2.52e-05	0.515643
PRIM2	cg14326354	0.230362	2.52e-05	0.516838
CLN5	cg14326354	-0.230287	2.54e-05	0.520101
NANP	cg14326354	0.230253	2.54e-05	0.521542
CD4	cg14326354	-0.230217	2.55e-05	0.523109
MYBL1	cg14326354	0.2301	2.58e-05	0.528263
TTC16	cg14326354	-0.230072	2.58e-05	0.529491
SEPP1	cg14326354	-0.230015	2.59e-05	0.53198
C9orf173	cg14326354	0.23	2.6e-05	0.532669
TNFRSF10A	cg14326354	-0.229988	2.6e-05	0.533179
DLGAP5	cg14326354	0.229973	2.6e-05	0.53386
SH2B2	cg14326354	0.229936	2.61e-05	0.535497
TDG	cg14326354	0.229917	2.62e-05	0.536346
HSPA12A	cg14326354	-0.229903	2.62e-05	0.536948
SOCS2	cg14326354	-0.229872	2.63e-05	0.538357
CARD16	cg14326354	-0.229778	2.65e-05	0.542565
CHEK2	cg14326354	0.229761	2.65e-05	0.543353
RFC5	cg14326354	0.229717	2.66e-05	0.54534
CNTFR	cg14326354	-0.229641	2.68e-05	0.548766
POU2F2	cg14326354	-0.229618	2.68e-05	0.549807
UQCRHL	cg14326354	0.229618	2.68e-05	0.549815
EPHA10	cg14326354	-0.229573	2.69e-05	0.551868
PGP	cg14326354	0.229572	2.69e-05	0.55194
ANKAR	cg14326354	-0.229537	2.7e-05	0.553546
CORO2B	cg14326354	-0.229525	2.7e-05	0.5541
CMKLR1	cg14326354	-0.229496	2.71e-05	0.555407
HSF5	cg14326354	-0.229482	2.71e-05	0.556046
PKNOX2	cg14326354	-0.22947	2.71e-05	0.556592
SNAI3	cg14326354	-0.229451	2.72e-05	0.55747
EIF2B4	cg14326354	0.229425	2.73e-05	0.558679
DKC1	cg14326354	0.229416	2.73e-05	0.559107
ZNF575	cg14326354	-0.229411	2.73e-05	0.559345
ITGAD	cg14326354	-0.229404	2.73e-05	0.559679
C1orf59	cg14326354	0.229325	2.75e-05	0.563361
ATP1A2	cg14326354	-0.229305	2.75e-05	0.564254
BHLHE41	cg14326354	-0.229136	2.79e-05	0.572224
PRR19	cg14326354	0.229114	2.8e-05	0.573285
FAM107A	cg14326354	-0.229109	2.8e-05	0.573525
CEBPA	cg14326354	-0.229091	2.8e-05	0.57437
TBC1D17	cg14326354	-0.228972	2.83e-05	0.580068
FAM95B1	cg14326354	-0.228947	2.84e-05	0.581242
XKR6	cg14326354	-0.228941	2.84e-05	0.58153
SLFN14	cg14326354	-0.228929	2.84e-05	0.582097
SOHLH1	cg14326354	0.228856	2.86e-05	0.585651
SPOCK2	cg14326354	-0.228818	2.87e-05	0.587486
FIGF	cg14326354	-0.228811	2.87e-05	0.587835
C16orf89	cg14326354	-0.228765	2.88e-05	0.590082
RHOH	cg14326354	-0.228734	2.89e-05	0.591596
REG1A	cg14326354	-0.228665	2.9e-05	0.594942
LRPPRC	cg14326354	0.228647	2.91e-05	0.595823
PARD3	cg14326354	0.228647	2.91e-05	0.595839
RGAG4	cg14326354	-0.228548	2.93e-05	0.600718
TESC	cg14326354	-0.228516	2.94e-05	0.602318
CPA3	cg14326354	-0.228474	2.95e-05	0.604422
IL21R	cg14326354	-0.228446	2.95e-05	0.605797
RFC2	cg14326354	0.228419	2.96e-05	0.607179
IQGAP1	cg14326354	-0.228379	2.97e-05	0.609192
SLC22A3	cg14326354	-0.228269	3e-05	0.614726
LRRC8D	cg14326354	0.228267	3e-05	0.614851
MAP4K2	cg14326354	0.228264	3e-05	0.614966
CSNK1G3	cg14326354	-0.228235	3.01e-05	0.616471
CD300LG	cg14326354	-0.228228	3.01e-05	0.616806
TMEM135	cg14326354	0.228186	3.02e-05	0.618949
SH2B3	cg14326354	-0.228127	3.03e-05	0.621992
LRRC33	cg14326354	-0.228065	3.05e-05	0.62517
GPR89A	cg14326354	0.228062	3.05e-05	0.625299
SUN3	cg14326354	0.227968	3.07e-05	0.630156
PSMB4	cg14326354	0.227956	3.08e-05	0.630772
ZNF687	cg14326354	0.227896	3.09e-05	0.633915
TIGD7	cg14326354	0.227855	3.1e-05	0.636054
NOL10	cg14326354	0.22782	3.11e-05	0.63788
SLC45A1	cg14326354	0.227809	3.11e-05	0.638457
CHST2	cg14326354	-0.227795	3.12e-05	0.639222
CYTH4	cg14326354	-0.227663	3.15e-05	0.646209
OSBPL5	cg14326354	-0.22766	3.15e-05	0.646335
METTL1	cg14326354	0.227606	3.17e-05	0.64924
RPAP3	cg14326354	0.227571	3.18e-05	0.6511
CHRNA9	cg14326354	0.227541	3.18e-05	0.652696
PCNA	cg14326354	0.227528	3.19e-05	0.653388
TMIGD2	cg14326354	-0.227507	3.19e-05	0.654525
CENPE	cg14326354	0.227388	3.22e-05	0.660952
UBD	cg14326354	-0.227387	3.22e-05	0.661006
BPHL	cg14326354	0.227385	3.22e-05	0.661131
GYPC	cg14326354	-0.227348	3.23e-05	0.663128
PRKCDBP	cg14326354	-0.227219	3.27e-05	0.670228
TARS2	cg14326354	0.227216	3.27e-05	0.670367
C16orf87	cg14326354	0.227171	3.28e-05	0.672843
C10orf116	cg14326354	-0.227037	3.32e-05	0.680289
C14orf33	cg14326354	0.226977	3.33e-05	0.683625
FOXM1	cg14326354	0.226946	3.34e-05	0.685369
SLC6A10P	cg14326354	0.226931	3.35e-05	0.686237
LTC4S	cg14326354	-0.226889	3.36e-05	0.688607
DUS4L	cg14326354	0.226868	3.36e-05	0.689791
RCC2	cg14326354	0.226863	3.37e-05	0.690044
ANXA2P2	cg14326354	-0.226831	3.37e-05	0.691903
DTHD1	cg14326354	-0.226762	3.39e-05	0.695806
RPA3	cg14326354	0.226712	3.41e-05	0.698654
MEMO1	cg14326354	0.226656	3.42e-05	0.701878
STAB2	cg14326354	-0.22664	3.43e-05	0.702784
ICOS	cg14326354	-0.226612	3.44e-05	0.704389
ANKHD1-EIF4EBP3	cg14326354	-0.226598	3.44e-05	0.705227
ZBTB10	cg14326354	0.226535	3.46e-05	0.708863
DOCK10	cg14326354	-0.226457	3.48e-05	0.713388
TIMELESS	cg14326354	0.226435	3.49e-05	0.714659
C17orf72	cg14326354	-0.226376	3.5e-05	0.718113
GBP4	cg14326354	-0.226343	3.51e-05	0.720057
KIF13B	cg14326354	-0.226322	3.52e-05	0.721291
RPS6KA1	cg14326354	-0.226205	3.55e-05	0.728267
C11orf21	cg14326354	-0.226202	3.55e-05	0.728411
WASF1	cg14326354	0.226187	3.56e-05	0.729344
FOXF2	cg14326354	-0.22617	3.56e-05	0.730331
MSN	cg14326354	-0.226168	3.56e-05	0.730452
GMPS	cg14326354	0.226164	3.56e-05	0.730699
TTC4	cg14326354	0.226117	3.58e-05	0.733483
ZSWIM1	cg14326354	0.225951	3.63e-05	0.743484
DDX50	cg14326354	0.225833	3.66e-05	0.750717
TUBA1C	cg14326354	0.22573	3.69e-05	0.757041
CACYBP	cg14326354	0.225716	3.7e-05	0.757917
PRR3	cg14326354	0.225682	3.71e-05	0.760033
CACNG6	cg14326354	-0.22563	3.72e-05	0.763246
FOLR2	cg14326354	-0.22557	3.74e-05	0.766957
DNPEP	cg14326354	-0.225549	3.75e-05	0.768272
CCDC99	cg14326354	0.225535	3.75e-05	0.769143
NDUFS6	cg14326354	0.225515	3.76e-05	0.770418
MYCBP2	cg14326354	-0.225373	3.8e-05	0.779385
MYADM	cg14326354	-0.225325	3.82e-05	0.782414
HIST1H4D	cg14326354	0.225303	3.82e-05	0.783844
FLJ40434	cg14326354	0.225136	3.88e-05	0.794536
NR1H2	cg14326354	-0.22513	3.88e-05	0.79497
SYNE1	cg14326354	-0.225101	3.89e-05	0.796851
DHX35	cg14326354	0.224934	3.94e-05	0.807691
C12orf69	cg14326354	-0.224914	3.95e-05	0.809044
POLQ	cg14326354	0.224868	3.96e-05	0.812029
EOMES	cg14326354	-0.224859	3.96e-05	0.812682
FCRL2	cg14326354	-0.224854	3.97e-05	0.812973
RGS13	cg14326354	-0.224843	3.97e-05	0.813677
GLMN	cg14326354	0.224809	3.98e-05	0.815943
ADAM28	cg14326354	-0.224765	3.99e-05	0.818903
TRAF1	cg14326354	-0.224763	4e-05	0.819022
PLIN2	cg14326354	0.224762	4e-05	0.819082
LRRN3	cg14326354	-0.224743	4e-05	0.820355
WIPF1	cg14326354	-0.224739	4e-05	0.820621
KIAA0947	cg14326354	0.224732	4e-05	0.821047
CLCN3	cg14326354	-0.224732	4.01e-05	0.821083
JAK1	cg14326354	-0.224698	4.02e-05	0.823379
UBL3	cg14326354	-0.22468	4.02e-05	0.824546
RNF144A	cg14326354	0.224663	4.03e-05	0.825695
CLTCL1	cg14326354	0.224607	4.05e-05	0.82944
FGD4	cg14326354	-0.224566	4.06e-05	0.832219
LAT	cg14326354	-0.224535	4.07e-05	0.83432
TOX2	cg14326354	-0.224505	4.08e-05	0.836336
LOC643837	cg14326354	0.224484	4.09e-05	0.837738
TCAM1P	cg14326354	0.224442	4.1e-05	0.840629
TRIB3	cg14326354	0.224387	4.12e-05	0.844398
2020-03-03	cg14326354	-0.224194	4.18e-05	0.857663
PRODH	cg14326354	-0.22416	4.2e-05	0.860061
TMEM92	cg14326354	-0.224153	4.2e-05	0.860559
CALCOCO1	cg14326354	-0.224138	4.2e-05	0.861557
MRPL12	cg14326354	0.22412	4.21e-05	0.862854
GTSF1	cg14326354	0.224055	4.23e-05	0.867428
SHH	cg14326354	-0.224041	4.24e-05	0.868391
CCNE2	cg14326354	0.223995	4.25e-05	0.871582
PPY2	cg14326354	0.223935	4.27e-05	0.875869
CDT1	cg14326354	0.223926	4.28e-05	0.87646
THSD1	cg14326354	-0.223873	4.29e-05	0.880289
MAGEB2	cg14326354	0.223801	4.32e-05	0.885424
SMC4	cg14326354	0.223764	4.33e-05	0.888065
P2RY13	cg14326354	-0.223757	4.33e-05	0.888521
CCDC138	cg14326354	0.223748	4.34e-05	0.889195
TIFAB	cg14326354	-0.223747	4.34e-05	0.889272
GATA5	cg14326354	-0.223696	4.36e-05	0.892924
AKAP7	cg14326354	-0.223681	4.36e-05	0.894057
ST8SIA1	cg14326354	-0.223666	4.37e-05	0.895101
PPARGC1B	cg14326354	-0.223659	4.37e-05	0.895596
CASP1	cg14326354	-0.223653	4.37e-05	0.896058
MLLT11	cg14326354	0.223629	4.38e-05	0.897801
MRPL21	cg14326354	0.223561	4.4e-05	0.90272
ZNF300	cg14326354	0.223533	4.41e-05	0.904758
HLA-DQA1	cg14326354	-0.223527	4.42e-05	0.9052
LMF1	cg14326354	-0.22349	4.43e-05	0.90796
GZMH	cg14326354	-0.223485	4.43e-05	0.908324
BYSL	cg14326354	0.223423	4.45e-05	0.912859
MGC29506	cg14326354	-0.223395	4.46e-05	0.914919
PHF11	cg14326354	-0.223322	4.49e-05	0.920282
ARL6IP5	cg14326354	-0.223284	4.5e-05	0.923122
USP28	cg14326354	0.223256	4.51e-05	0.925245
NOL9	cg14326354	0.223253	4.51e-05	0.925484
RAB2B	cg14326354	0.223142	4.55e-05	0.933799
MYO19	cg14326354	0.223135	4.56e-05	0.934288
LRRC42	cg14326354	0.223118	4.56e-05	0.935604
ERI3	cg14326354	0.223099	4.57e-05	0.93699
PPIE	cg14326354	0.223083	4.58e-05	0.938238
PRNP	cg14326354	-0.223078	4.58e-05	0.938576
VPREB3	cg14326354	-0.223063	4.58e-05	0.939728
CAD	cg14326354	0.223061	4.58e-05	0.939881
CLYBL	cg14326354	-0.22295	4.63e-05	0.948299
PRSS1	cg14326354	-0.222877	4.65e-05	0.953924
PSMG3	cg14326354	0.222867	4.66e-05	0.954726
GAS7	cg14326354	-0.222812	4.68e-05	0.95889
AK3	cg14326354	-0.222778	4.69e-05	0.961574
ACSS1	cg14326354	-0.222776	4.69e-05	0.961679
TST	cg14326354	-0.22277	4.69e-05	0.96214
RNF145	cg14326354	-0.222762	4.7e-05	0.962813
CNTNAP3	cg14326354	-0.222743	4.7e-05	0.964245
DUSP14	cg14326354	0.222739	4.71e-05	0.964603
LAGE3	cg14326354	0.222723	4.71e-05	0.965801
CCDC52	cg14326354	0.222697	4.72e-05	0.967838
CHAF1B	cg14326354	0.222694	4.72e-05	0.968048
HOOK1	cg14326354	0.222672	4.73e-05	0.96978
HERC6	cg14326354	-0.22266	4.73e-05	0.970703
TMEM143	cg14326354	-0.222647	4.74e-05	0.971737
PSMB5	cg14326354	0.222639	4.74e-05	0.972347
TRIM45	cg14326354	0.222617	4.75e-05	0.974053
MAST1	cg14326354	0.22261	4.75e-05	0.974627
ACSM1	cg14326354	-0.222569	4.77e-05	0.977857
IPO9	cg14326354	0.222478	4.8e-05	0.985039
C11orf45	cg14326354	-0.222378	4.84e-05	0.992996
LIN28B	cg14326354	0.222366	4.85e-05	0.993935
FAM122A	cg14326354	-0.222361	4.85e-05	0.994334
BANP	cg14326354	0.222343	4.86e-05	0.995755
RBPMS2	cg14326354	0.222332	4.86e-05	0.996685
FLJ36000	cg14326354	0.222289	4.88e-05	1
TYMS	cg14326354	0.222244	4.9e-05	1
LGALS9B	cg14326354	-0.222232	4.9e-05	1
TTC7B	cg14326354	0.222229	4.9e-05	1
HELQ	cg14326354	-0.222138	4.94e-05	1
C1QL4	cg14326354	0.222095	4.95e-05	1
NRG2	cg14326354	-0.222041	4.98e-05	1
SAP30L	cg14326354	-0.22201	4.99e-05	1
ZSCAN16	cg14326354	0.221946	5.01e-05	1
C11orf82	cg14326354	0.221945	5.01e-05	1
LEMD1	cg14326354	-0.221942	5.02e-05	1
METTL7A	cg14326354	-0.22194	5.02e-05	1
EDA	cg14326354	-0.221921	5.02e-05	1
SFXN3	cg14326354	-0.221915	5.03e-05	1
DIO3OS	cg14326354	-0.221869	5.05e-05	1
FAM83E	cg14326354	-0.221806	5.07e-05	1
SPINK7	cg14326354	-0.221746	5.1e-05	1
SHCBP1	cg14326354	0.221724	5.1e-05	1
PRPSAP1	cg14326354	0.221697	5.12e-05	1
TSPAN3	cg14326354	-0.221683	5.12e-05	1
HCG4	cg14326354	-0.221647	5.14e-05	1
MCM8	cg14326354	0.221627	5.14e-05	1
BOLL	cg14326354	0.221619	5.15e-05	1
OR52N4	cg14326354	-0.221584	5.16e-05	1
LOC146336	cg14326354	-0.221536	5.18e-05	1
SNTA1	cg14326354	0.221523	5.19e-05	1
HMBS	cg14326354	0.221479	5.21e-05	1
FCAMR	cg14326354	-0.22146	5.21e-05	1
MRPL37	cg14326354	0.221448	5.22e-05	1
SYT1	cg14326354	0.221446	5.22e-05	1
MAGOH	cg14326354	0.2214	5.24e-05	1
SNX1	cg14326354	-0.221391	5.24e-05	1
ABCC3	cg14326354	-0.221318	5.27e-05	1
GRIA1	cg14326354	-0.2213	5.28e-05	1
EIF4E3	cg14326354	-0.221282	5.29e-05	1
ARAP2	cg14326354	-0.221282	5.29e-05	1
COLEC12	cg14326354	-0.22123	5.31e-05	1
SLCO4A1	cg14326354	-0.22119	5.33e-05	1
H19	cg14326354	0.221169	5.34e-05	1
SNAPIN	cg14326354	0.221149	5.34e-05	1
DDB2	cg14326354	-0.221132	5.35e-05	1
FAS	cg14326354	-0.221129	5.35e-05	1
RBL1	cg14326354	0.221118	5.36e-05	1
HLA-DRA	cg14326354	-0.221042	5.39e-05	1
HPS1	cg14326354	-0.221031	5.4e-05	1
MKRN3	cg14326354	0.221018	5.4e-05	1
CLDN6	cg14326354	0.220961	5.43e-05	1
TANK	cg14326354	-0.220948	5.43e-05	1
NCAPD3	cg14326354	0.220935	5.44e-05	1
TARP	cg14326354	-0.220925	5.44e-05	1
CTHRC1	cg14326354	0.220874	5.46e-05	1
RPAP2	cg14326354	0.220872	5.46e-05	1
FAM66A	cg14326354	-0.220819	5.49e-05	1
P2RX2	cg14326354	-0.220712	5.53e-05	1
ISCU	cg14326354	-0.220707	5.54e-05	1
LOC100129034	cg14326354	-0.220681	5.55e-05	1
KNTC1	cg14326354	0.220624	5.57e-05	1
ANXA2	cg14326354	-0.220613	5.58e-05	1
PLIN5	cg14326354	-0.220535	5.61e-05	1
B3GNT8	cg14326354	-0.220496	5.63e-05	1
DNAJC9	cg14326354	0.220488	5.63e-05	1
OR8B2	cg14326354	0.220461	5.65e-05	1
PDE4C	cg14326354	-0.220431	5.66e-05	1
CHTF18	cg14326354	0.220389	5.68e-05	1
INCENP	cg14326354	0.220386	5.68e-05	1
LINGO4	cg14326354	-0.220385	5.68e-05	1
HLA-DRB5	cg14326354	-0.220336	5.7e-05	1
KCNAB2	cg14326354	-0.220333	5.7e-05	1
LOC401588	cg14326354	0.220317	5.71e-05	1
ATAD3B	cg14326354	0.220274	5.73e-05	1
RALA	cg14326354	0.220206	5.76e-05	1
KIAA1731	cg14326354	0.220202	5.76e-05	1
SERPING1	cg14326354	-0.220108	5.81e-05	1
PPP4C	cg14326354	0.220107	5.81e-05	1
VSIG1	cg14326354	-0.220077	5.82e-05	1
ADNP	cg14326354	0.219977	5.87e-05	1
XPOT	cg14326354	0.219925	5.89e-05	1
CBFA2T2	cg14326354	0.219903	5.9e-05	1
FAM167A	cg14326354	-0.219855	5.92e-05	1
FKBP10	cg14326354	0.219849	5.93e-05	1
CDS1	cg14326354	-0.219841	5.93e-05	1
FTHL17	cg14326354	0.219825	5.94e-05	1
LRRC4C	cg14326354	-0.219823	5.94e-05	1
EIF2S2	cg14326354	0.21981	5.95e-05	1
TMEM192	cg14326354	-0.219802	5.95e-05	1
MTCH1	cg14326354	0.219756	5.97e-05	1
LOC150786	cg14326354	0.219714	5.99e-05	1
TLE4	cg14326354	-0.219618	6.04e-05	1
SPRR3	cg14326354	-0.219586	6.05e-05	1
BZW2	cg14326354	0.219553	6.07e-05	1
FLJ22536	cg14326354	0.219533	6.08e-05	1
ZNF204P	cg14326354	-0.219472	6.11e-05	1
KIAA0895	cg14326354	0.21944	6.12e-05	1
P4HA1	cg14326354	0.219391	6.15e-05	1
CD1C	cg14326354	-0.219387	6.15e-05	1
C6	cg14326354	-0.219386	6.15e-05	1
BIRC3	cg14326354	-0.219383	6.15e-05	1
CBS	cg14326354	0.219371	6.16e-05	1
C1orf174	cg14326354	0.219356	6.16e-05	1
HHIP	cg14326354	-0.219321	6.18e-05	1
ETS2	cg14326354	-0.219287	6.2e-05	1
APBA2	cg14326354	0.219283	6.2e-05	1
POM121L2	cg14326354	-0.21927	6.21e-05	1
RPL3	cg14326354	-0.219243	6.22e-05	1
HNRNPA2B1	cg14326354	0.219242	6.22e-05	1
ABLIM3	cg14326354	-0.219209	6.24e-05	1
P4HA3	cg14326354	0.219204	6.24e-05	1
NR3C2	cg14326354	-0.219189	6.25e-05	1
ITGA6	cg14326354	-0.219184	6.25e-05	1
PRPS1	cg14326354	0.219179	6.25e-05	1
CCDC58	cg14326354	0.21916	6.26e-05	1
LOC731789	cg14326354	0.219148	6.27e-05	1
GAGE1	cg14326354	0.219126	6.28e-05	1
USP42	cg14326354	0.219078	6.3e-05	1
FUT7	cg14326354	-0.219066	6.31e-05	1
CHCHD2	cg14326354	0.219017	6.33e-05	1
THBD	cg14326354	-0.21901	6.33e-05	1
RGNEF	cg14326354	-0.219008	6.34e-05	1
IQGAP3	cg14326354	0.218958	6.36e-05	1
MUC5B	cg14326354	-0.218958	6.36e-05	1
ARRDC2	cg14326354	-0.218944	6.37e-05	1
ZFP36	cg14326354	-0.218886	6.4e-05	1
FERMT3	cg14326354	-0.218884	6.4e-05	1
CKM	cg14326354	0.218844	6.42e-05	1
COMMD2	cg14326354	0.21882	6.43e-05	1
MGC21881	cg14326354	-0.218762	6.46e-05	1
PPM1G	cg14326354	0.21873	6.48e-05	1
MINA	cg14326354	0.218722	6.48e-05	1
NRD1	cg14326354	0.218671	6.51e-05	1
CEP78	cg14326354	0.218656	6.52e-05	1
ZNF670	cg14326354	0.218584	6.55e-05	1
ITGB7	cg14326354	-0.218567	6.56e-05	1
RLF	cg14326354	0.218556	6.57e-05	1
TOMM70A	cg14326354	0.218541	6.57e-05	1
SLC10A2	cg14326354	-0.218471	6.61e-05	1
IFI35	cg14326354	-0.218422	6.64e-05	1
NKG7	cg14326354	-0.218416	6.64e-05	1
SPC25	cg14326354	0.218405	6.65e-05	1
TCF25	cg14326354	-0.21833	6.68e-05	1
LSAMP	cg14326354	-0.218285	6.71e-05	1
AIM1	cg14326354	-0.218209	6.75e-05	1
DONSON	cg14326354	0.218194	6.76e-05	1
SGPP2	cg14326354	-0.218127	6.79e-05	1
FZD9	cg14326354	0.218124	6.79e-05	1
OLIG3	cg14326354	0.218103	6.81e-05	1
FYB	cg14326354	-0.218092	6.81e-05	1
SLC25A13	cg14326354	0.217974	6.87e-05	1
ITGB4	cg14326354	-0.21794	6.89e-05	1
SF3A3	cg14326354	0.217907	6.91e-05	1
MPEG1	cg14326354	-0.217882	6.93e-05	1
FCGRT	cg14326354	-0.217881	6.93e-05	1
LY86	cg14326354	-0.217674	7.04e-05	1
STAU1	cg14326354	0.217672	7.04e-05	1
UBE2J2	cg14326354	0.21759	7.09e-05	1
OR8D1	cg14326354	0.217562	7.1e-05	1
ZMYM1	cg14326354	0.217538	7.11e-05	1
C6orf155	cg14326354	-0.217529	7.12e-05	1
PYDC2	cg14326354	0.217493	7.14e-05	1
MMRN1	cg14326354	-0.217469	7.15e-05	1
P2RX5	cg14326354	-0.217424	7.18e-05	1
TOX4	cg14326354	0.217347	7.22e-05	1
APH1B	cg14326354	-0.217319	7.24e-05	1
DNASE1L3	cg14326354	-0.217296	7.25e-05	1
ZNF681	cg14326354	0.217281	7.26e-05	1
TSPO	cg14326354	-0.217279	7.26e-05	1
RGS3	cg14326354	-0.217211	7.3e-05	1
BUD13	cg14326354	0.21721	7.3e-05	1
SNRPD1	cg14326354	0.217204	7.3e-05	1
MCART6	cg14326354	-0.217182	7.32e-05	1
B4GALT2	cg14326354	0.21715	7.33e-05	1
RUFY1	cg14326354	-0.217087	7.37e-05	1
ZNF676	cg14326354	0.217041	7.4e-05	1
EIF4A3	cg14326354	0.216926	7.46e-05	1
GTSE1	cg14326354	0.216917	7.47e-05	1
MGP	cg14326354	-0.216875	7.49e-05	1
NAIF1	cg14326354	0.216712	7.59e-05	1
MEA1	cg14326354	0.216695	7.6e-05	1
BAG2	cg14326354	0.21669	7.6e-05	1
LOC202181	cg14326354	-0.216638	7.63e-05	1
LOC148696	cg14326354	-0.216637	7.64e-05	1
EFCAB1	cg14326354	-0.216625	7.64e-05	1
DEFB126	cg14326354	0.216622	7.64e-05	1
HNRPLL	cg14326354	0.216601	7.66e-05	1
CORO1A	cg14326354	-0.21651	7.71e-05	1
BTC	cg14326354	-0.216458	7.74e-05	1
HIBADH	cg14326354	0.21644	7.75e-05	1
LCLAT1	cg14326354	0.216312	7.83e-05	1
HMGN2	cg14326354	0.216296	7.84e-05	1
ITGB3BP	cg14326354	0.216288	7.85e-05	1
DPP7	cg14326354	-0.216253	7.87e-05	1
SCARF1	cg14326354	-0.21624	7.88e-05	1
PDCD1	cg14326354	-0.216171	7.92e-05	1
SCN11A	cg14326354	-0.216128	7.95e-05	1
RBM4	cg14326354	0.216073	7.98e-05	1
NWD1	cg14326354	-0.216067	7.98e-05	1
C14orf159	cg14326354	-0.215965	8.05e-05	1
YKT6	cg14326354	0.215908	8.08e-05	1
PFDN2	cg14326354	0.215884	8.1e-05	1
RASGRP3	cg14326354	-0.215835	8.13e-05	1
FANCD2	cg14326354	0.215771	8.17e-05	1
RNH1	cg14326354	-0.215758	8.18e-05	1
ARHGEF3	cg14326354	-0.215689	8.22e-05	1
SPG11	cg14326354	-0.215683	8.23e-05	1
ARHGAP24	cg14326354	-0.215671	8.23e-05	1
SCGB3A2	cg14326354	-0.215651	8.25e-05	1
ZNF542	cg14326354	0.215638	8.25e-05	1
DPH3B	cg14326354	0.215629	8.26e-05	1
RCE1	cg14326354	0.21558	8.29e-05	1
HORMAD1	cg14326354	0.215569	8.3e-05	1
ESD	cg14326354	-0.215494	8.35e-05	1
SKA2	cg14326354	0.215458	8.37e-05	1
FXYD3	cg14326354	-0.215445	8.38e-05	1
LAMP3	cg14326354	-0.21543	8.39e-05	1
BTN1A1	cg14326354	-0.215421	8.4e-05	1
ONECUT2	cg14326354	-0.215408	8.4e-05	1
SOX6	cg14326354	-0.215377	8.42e-05	1
C21orf2	cg14326354	-0.215359	8.44e-05	1
HCN4	cg14326354	-0.215352	8.44e-05	1
ATAD3A	cg14326354	0.215308	8.47e-05	1
MMAA	cg14326354	-0.215258	8.5e-05	1
MOB2	cg14326354	-0.215243	8.51e-05	1
KIAA0141	cg14326354	-0.215237	8.52e-05	1
NGF	cg14326354	0.215233	8.52e-05	1
SUPT16H	cg14326354	0.215226	8.52e-05	1
PVRIG	cg14326354	-0.215202	8.54e-05	1
GJB4	cg14326354	-0.215193	8.55e-05	1
HLA-DQB1	cg14326354	-0.215152	8.57e-05	1
SETDB1	cg14326354	0.215115	8.6e-05	1
PIF1	cg14326354	0.215081	8.62e-05	1
B4GALT5	cg14326354	0.215048	8.64e-05	1
GPR62	cg14326354	0.214959	8.7e-05	1
SS18L1	cg14326354	0.214885	8.75e-05	1
PRCC	cg14326354	0.214878	8.76e-05	1
C20orf56	cg14326354	-0.214819	8.8e-05	1
NTNG1	cg14326354	-0.214789	8.82e-05	1
MYO18A	cg14326354	-0.214756	8.84e-05	1
PCDH11X	cg14326354	-0.214735	8.86e-05	1
PNOC	cg14326354	-0.214692	8.88e-05	1
SLC35A2	cg14326354	0.214612	8.94e-05	1
FCHO2	cg14326354	-0.214607	8.94e-05	1
SLC26A5	cg14326354	-0.214589	8.96e-05	1
LSM5	cg14326354	0.21458	8.96e-05	1
NT5DC2	cg14326354	0.214574	8.97e-05	1
ZNF667	cg14326354	0.214571	8.97e-05	1
MRPL13	cg14326354	0.214567	8.97e-05	1
TMEM201	cg14326354	0.214382	9.1e-05	1
ZNF77	cg14326354	0.214303	9.16e-05	1
FAM179A	cg14326354	-0.214209	9.22e-05	1
SPIN4	cg14326354	0.214205	9.23e-05	1
ABHD15	cg14326354	-0.214144	9.27e-05	1
LOC100129534	cg14326354	-0.214044	9.34e-05	1
FHL1	cg14326354	-0.214016	9.36e-05	1
GLOD5	cg14326354	-0.214014	9.36e-05	1
C1orf84	cg14326354	0.213966	9.4e-05	1
PITX1	cg14326354	-0.213887	9.46e-05	1
DHX57	cg14326354	0.213878	9.46e-05	1
ICAM2	cg14326354	-0.213853	9.48e-05	1
SOX7	cg14326354	-0.213813	9.51e-05	1
ST5	cg14326354	-0.213775	9.54e-05	1
SF3B4	cg14326354	0.213739	9.56e-05	1
LPCAT2	cg14326354	-0.21369	9.6e-05	1
SLC35F3	cg14326354	-0.213681	9.61e-05	1
FKBP14	cg14326354	0.21363	9.65e-05	1
MED30	cg14326354	0.213629	9.65e-05	1
PPP2R2D	cg14326354	0.213626	9.65e-05	1
UBE2L6	cg14326354	-0.213546	9.71e-05	1
CLPB	cg14326354	0.213542	9.71e-05	1
CECR2	cg14326354	0.213515	9.73e-05	1
HDAC2	cg14326354	0.213484	9.75e-05	1
PRRG1	cg14326354	-0.213458	9.77e-05	1
MFN1	cg14326354	0.213422	9.8e-05	1
CAPN9	cg14326354	-0.213369	9.84e-05	1
SORCS1	cg14326354	-0.213342	9.86e-05	1
TSPAN4	cg14326354	-0.213342	9.86e-05	1
PFN2	cg14326354	0.213305	9.89e-05	1
GNAO1	cg14326354	-0.213247	9.93e-05	1
ALDH1A1	cg14326354	-0.213237	9.94e-05	1
FXYD7	cg14326354	-0.213224	9.95e-05	1
PGGT1B	cg14326354	-0.21321	9.96e-05	1
IGFBP6	cg14326354	-0.213124	0.000100293	1
SLC25A23	cg14326354	-0.213102	0.00010046	1
PLEKHM1P	cg14326354	-0.213094	0.000100527	1
RASGRF1	cg14326354	-0.213038	0.000100958	1
ZSCAN21	cg14326354	0.213032	0.000101002	1
ADH6	cg14326354	-0.213027	0.000101046	1
WDR17	cg14326354	-0.212921	0.000101866	1
MFAP4	cg14326354	-0.212865	0.000102309	1
LRP10	cg14326354	-0.212846	0.000102459	1
NIPBL	cg14326354	0.21284	0.000102503	1
PEX10	cg14326354	0.212836	0.00010254	1
MYCN	cg14326354	0.212825	0.000102627	1
DPEP2	cg14326354	-0.2128	0.000102826	1
LOXL4	cg14326354	-0.212787	0.000102921	1
TRIM29	cg14326354	-0.212786	0.000102929	1
P2RX7	cg14326354	-0.212733	0.000103356	1
TCEANC	cg14326354	-0.212721	0.000103445	1
CYB5D2	cg14326354	-0.212709	0.000103544	1
IL5RA	cg14326354	-0.212687	0.000103722	1
APOL1	cg14326354	-0.21266	0.000103932	1
DIABLO	cg14326354	0.212595	0.000104453	1
SCGB3A1	cg14326354	-0.212586	0.000104523	1
AHCTF1	cg14326354	0.212549	0.000104828	1
ARHGAP26	cg14326354	-0.212479	0.000105388	1
KCTD15	cg14326354	-0.212452	0.000105606	1
FXYD1	cg14326354	-0.212432	0.000105772	1
C4orf46	cg14326354	0.212425	0.00010583	1
ATP10A	cg14326354	-0.212395	0.000106071	1
CARD18	cg14326354	0.212381	0.000106186	1
ZNF124	cg14326354	0.21238	0.000106189	1
MST1R	cg14326354	-0.21238	0.000106191	1
TWIST2	cg14326354	-0.212332	0.000106585	1
PDSS1	cg14326354	0.212279	0.00010702	1
OR8B4	cg14326354	0.212262	0.000107158	1
MCHR2	cg14326354	0.212244	0.000107303	1
SGCE	cg14326354	0.212213	0.000107564	1
AHNAK	cg14326354	-0.212202	0.000107655	1
XCR1	cg14326354	-0.212147	0.000108104	1
PARG	cg14326354	0.212144	0.000108131	1
CHMP7	cg14326354	-0.212112	0.0001084	1
PIPSL	cg14326354	0.212096	0.000108531	1
TNFSF12	cg14326354	-0.212062	0.000108814	1
NCRNA00200	cg14326354	0.21202	0.000109161	1
CASP8	cg14326354	-0.212019	0.000109168	1
DRGX	cg14326354	-0.212018	0.000109181	1
DHRS7	cg14326354	-0.211973	0.00010956	1
C6orf182	cg14326354	0.211967	0.000109612	1
ITM2B	cg14326354	-0.211944	0.000109803	1
PTCD3	cg14326354	0.211901	0.000110161	1
TNNC2	cg14326354	0.211882	0.000110319	1
CCNY	cg14326354	0.211819	0.000110854	1
OPRK1	cg14326354	0.211809	0.000110941	1
BEND4	cg14326354	-0.211786	0.000111134	1
C5orf32	cg14326354	-0.211699	0.00011188	1
NGB	cg14326354	0.211668	0.000112146	1
BTNL9	cg14326354	-0.21163	0.00011247	1
CASR	cg14326354	-0.211582	0.000112887	1
SPAST	cg14326354	0.211543	0.000113225	1
AFF1	cg14326354	-0.211484	0.000113731	1
NEIL3	cg14326354	0.211465	0.000113899	1
PTGFR	cg14326354	-0.211443	0.000114088	1
RIN1	cg14326354	-0.211419	0.000114298	1
NTRK3	cg14326354	-0.211399	0.000114472	1
RHEB	cg14326354	0.211379	0.000114651	1
FOXA2	cg14326354	-0.211338	0.000115008	1
EIF2B5	cg14326354	0.211309	0.000115265	1
PRUNE	cg14326354	0.211262	0.000115673	1
ODF3B	cg14326354	-0.211243	0.000115843	1
PAQR5	cg14326354	-0.211226	0.000115992	1
PCSK9	cg14326354	-0.211184	0.000116372	1
AGGF1	cg14326354	-0.211138	0.000116774	1
PKMYT1	cg14326354	0.211134	0.000116814	1
CMA1	cg14326354	-0.211078	0.000117313	1
ETV1	cg14326354	-0.210975	0.000118237	1
MNX1	cg14326354	-0.210953	0.000118438	1
EEF1E1	cg14326354	0.210943	0.000118522	1
ITGA4	cg14326354	-0.210922	0.000118719	1
FAM86B1	cg14326354	-0.210904	0.000118875	1
SLC39A7	cg14326354	0.210882	0.000119079	1
SPRY4	cg14326354	-0.210844	0.000119422	1
PL-5283	cg14326354	0.210844	0.000119427	1
XAF1	cg14326354	-0.210824	0.000119605	1
STARD8	cg14326354	-0.210813	0.000119704	1
GALNT10	cg14326354	-0.210781	0.000119999	1
PLEK	cg14326354	-0.210721	0.000120547	1
EIF2C3	cg14326354	0.210685	0.000120877	1
GABRB3	cg14326354	-0.210679	0.000120932	1
PGPEP1	cg14326354	-0.21063	0.000121382	1
B3GAT1	cg14326354	-0.210568	0.000121955	1
SOX15	cg14326354	0.210561	0.000122029	1
USP39	cg14326354	0.210559	0.000122042	1
NDUFA12	cg14326354	0.210499	0.000122604	1
POU2F3	cg14326354	-0.210479	0.000122792	1
CHD7	cg14326354	0.210478	0.000122794	1
HS2ST1	cg14326354	0.210467	0.000122904	1
TUBA1B	cg14326354	0.210455	0.000123012	1
FANCI	cg14326354	0.21045	0.000123055	1
ZNF212	cg14326354	0.210359	0.000123908	1
ABCA8	cg14326354	-0.210304	0.000124434	1
NPM3	cg14326354	0.210261	0.000124843	1
C16orf88	cg14326354	0.210224	0.000125192	1
ACSF3	cg14326354	-0.21021	0.000125319	1
POLR1C	cg14326354	0.210101	0.000126365	1
SEPHS2	cg14326354	0.210046	0.000126896	1
DNAJC5B	cg14326354	-0.210025	0.000127097	1
AHCY	cg14326354	0.210012	0.000127219	1
HELLS	cg14326354	0.210001	0.00012733	1
NUCB1	cg14326354	-0.209964	0.000127689	1
SNRPB2	cg14326354	0.209932	0.000127992	1
ARC	cg14326354	-0.20993	0.000128019	1
NEDD8	cg14326354	0.209906	0.000128249	1
IL34	cg14326354	-0.209872	0.000128582	1
SERPINA4	cg14326354	-0.209856	0.00012874	1
ASPA	cg14326354	-0.209836	0.000128934	1
ETFB	cg14326354	-0.209793	0.000129355	1
[truncated: 18,503 more rows]
