# Supplementary material for: Epigenome-wide gene–age interaction analysis reveals reversed effects of PRODH DNA methylation on survival between young and elderly early-stage NSCLC patients
Source: Aging (Albany NY). 2020 Jun 8;12(11):10642–62. doi: 10.18632/aging.103284 (PMC7346054; doi:10.18632/aging.103284)
Supplement: Supplementary Material 4 [file aging-12-103284-s001..xlsx]

## Sheet: Supp4_TMB
Supplementary Material 4. Results of Tumor mutational burden (TMB) analysis of each sample from TCGA.
ID	log2(TMB)	TMB
TCGA-05-4390	4.06041	16.6842
TCGA-05-4405	3.2156	9.28947
TCGA-05-4417	3.13145	8.76316
TCGA-05-4424	4.10742	17.2368
TCGA-05-4427	4.83954	28.6316
TCGA-05-4433	0.178337	1.13158
TCGA-05-5423	2.16993	4.5
TCGA-05-5425	3.8501	14.4211
TCGA-05-5715	1.8501	3.60526
TCGA-38-4631	4.45425	21.9211
TCGA-38-7271	-0.293731	0.815789
TCGA-38-A44F	-2.66297	0.157895
TCGA-44-2656	4.36678	20.6316
TCGA-44-2665	-0.118644	0.921053
TCGA-44-2666	-0.604071	0.657895
TCGA-44-2668	3.06496	8.36842
TCGA-44-3918	4.48678	22.4211
TCGA-44-4112	3.69165	12.9211
TCGA-44-5644	4.90689	30
TCGA-44-5645	0.14439	1.10526
TCGA-44-6145	3.074	8.42105
TCGA-44-6146	-0.293731	0.815789
TCGA-44-6147	0.533432	1.44737
TCGA-44-6148	-2.926	0.131579
TCGA-44-6775	0.452512	1.36842
TCGA-44-6776	2.61005	6.10526
TCGA-44-6777	3.12276	8.71053
TCGA-44-6778	3.47659	11.1316
TCGA-44-6779	1.55943	2.94737
TCGA-44-7659	2.14439	4.42105
TCGA-44-7660	3.30282	9.86842
TCGA-44-7661	2.61005	6.10526
TCGA-44-7662	3.94683	15.4211
TCGA-44-7667	3.68576	12.8684
TCGA-44-7669	3.71786	13.1579
TCGA-44-7670	5.06269	33.4211
TCGA-44-7671	2.88136	7.36842
TCGA-44-7672	1.74076	3.34211
TCGA-44-8117	4.5562	23.5263
TCGA-44-8119	4.20945	18.5
TCGA-44-8120	4.24393	18.9474
TCGA-44-A479	2.80735	7
TCGA-44-A47A	2.32193	5
TCGA-44-A47B	0.584963	1.5
TCGA-44-A47G	-0.293731	0.815789
TCGA-44-A4SS	3.33327	10.0789
TCGA-44-A4SU	1.82889	3.55263
TCGA-49-4487	2.77444	6.84211
TCGA-49-4488	3.14868	8.86842
TCGA-49-4514	3.22375	9.34211
TCGA-49-6742	2.90689	7.5
TCGA-49-6744	1.9419	3.84211
TCGA-49-AAQV	-0.160465	0.894737
TCGA-49-AAR0	1.45251	2.73684
TCGA-49-AAR2	3.62244	12.3158
TCGA-49-AAR3	0.961526	1.94737
TCGA-49-AAR9	4.37229	20.7105
TCGA-49-AARE	5.42184	42.8684
TCGA-49-AARN	3.76888	13.6316
TCGA-49-AARO	3.97848	15.7632
TCGA-49-AARQ	4.37778	20.7895
TCGA-4B-A93V	2.12711	4.36842
TCGA-50-5045	2.65896	6.31579
TCGA-50-5049	4.06949	16.7895
TCGA-50-5055	-2.926	0.131579
TCGA-50-5066	2.66496	6.34211
TCGA-50-5066	2.66496	6.34211
TCGA-50-5068	1.17834	2.26316
TCGA-50-5931	3.19916	9.18421
TCGA-50-5932	1.22781	2.34211
TCGA-50-5935	0.14439	1.10526
TCGA-50-5939	1.074	2.10526
TCGA-50-5942	-0.118644	0.921053
TCGA-50-5944	1.05585	2.07895
TCGA-50-5946	4.30474	19.7632
TCGA-50-5946	4.30474	19.7632
TCGA-50-6590	4.48847	22.4474
TCGA-50-6592	2.8501	7.21053
TCGA-50-6597	0.658963	1.57895
TCGA-50-6673	0.584963	1.5
TCGA-50-7109	2.80735	7
TCGA-50-8457	0.479993	1.39474
TCGA-50-8459	1.27563	2.42105
TCGA-50-8460	-0.440573	0.736842
TCGA-53-7626	3.48678	11.2105
TCGA-53-A4EZ	4.06722	16.7632
TCGA-55-5899	3.7605	13.5526
TCGA-55-6543	-0.788496	0.578947
TCGA-55-6642	1.93198	3.81579
TCGA-55-6712	1.57225	2.97368
TCGA-55-6969	3.48678	11.2105
TCGA-55-6971	1.25987	2.39474
TCGA-55-6972	2.97607	7.86842
TCGA-55-6975	1.22781	2.34211
TCGA-55-6978	-0.925999	0.526316
TCGA-55-6979	1.41028	2.65789
TCGA-55-6980	-1.66297	0.315789
TCGA-55-6982	2.21968	4.65789
TCGA-55-6983	1.19502	2.28947
TCGA-55-6984	-0.604071	0.657895
TCGA-55-6985	3.61935	12.2895
TCGA-55-6986	-0.724366	0.605263
TCGA-55-6987	2	4
TCGA-55-7281	3.72649	13.2368
TCGA-55-7570	3.53998	11.6316
TCGA-55-7573	0.50696	1.42105
TCGA-55-7574	1.72935	3.31579
TCGA-55-7576	3.32572	10.0263
TCGA-55-7725	2.05585	4.15789
TCGA-55-7726	1.59756	3.02632
TCGA-55-7728	1.47999	2.78947
TCGA-55-7815	1.88136	3.68421
TCGA-55-7903	2.00946	4.02632
TCGA-55-7907	5.14117	35.2895
TCGA-55-7910	3.15295	8.89474
TCGA-55-7911	2.59756	6.05263
TCGA-55-7914	2.33703	5.05263
TCGA-55-7994	5.5562	47.0526
TCGA-55-7995	4.3464	20.3421
TCGA-55-8085	3.06496	8.36842
TCGA-55-8087	-0.389947	0.763158
TCGA-55-8089	5.01769	32.3947
TCGA-55-8090	1.49354	2.81579
TCGA-55-8091	-0.85561	0.552632
TCGA-55-8092	4.0071	16.0789
TCGA-55-8096	1.64689	3.13158
TCGA-55-8097	1.59756	3.02632
TCGA-55-8203	3.68576	12.8684
TCGA-55-8205	3.60694	12.1842
TCGA-55-8206	-0.341037	0.789474
TCGA-55-8207	3.31049	9.92105
TCGA-55-8299	-1.24793	0.421053
TCGA-55-8301	2.71786	6.57895
TCGA-55-8302	4.07625	16.8684
TCGA-55-8506	5.69605	51.8421
TCGA-55-8507	4.88906	29.6316
TCGA-55-8508	2.37412	5.18421
TCGA-55-8510	3.05128	8.28947
TCGA-55-8511	3.90942	15.0263
TCGA-55-8514	3.1008	8.57895
TCGA-55-8614	2.68871	6.44737
TCGA-55-8616	3.82621	14.1842
TCGA-55-8619	-2.926	0.131579
TCGA-55-8621	-2.44057	0.184211
TCGA-55-A48X	3.08746	8.5
TCGA-55-A48Y	3.06949	8.39474
TCGA-55-A490	5.24992	38.0526
TCGA-55-A492	2.89673	7.44737
TCGA-55-A493	2.3887	5.23684
TCGA-55-A494	2.90182	7.47368
TCGA-55-A4DF	4.41207	21.2895
TCGA-55-A4DG	4.26777	19.2632
TCGA-55-A57B	-0.160465	0.894737
TCGA-62-8395	0.634716	1.55263
TCGA-62-8397	-0.160465	0.894737
TCGA-62-A46O	4.77027	27.2895
TCGA-62-A46P	3.01886	8.10526
TCGA-62-A46R	2.1867	4.55263
TCGA-62-A46S	1.70627	3.26316
TCGA-62-A46U	0.109624	1.07895
TCGA-62-A46V	0.533432	1.44737
TCGA-62-A470	1.80735	3.5
TCGA-62-A471	1.69459	3.23684
TCGA-62-A472	0.729352	1.65789
TCGA-64-1681	0.452512	1.36842
TCGA-64-5774	2.1008	4.28947
TCGA-64-5778	3.86321	14.5526
TCGA-64-5781	4.95787	31.0789
TCGA-64-5815	2.29123	4.89474
TCGA-67-6215	1.38143	2.60526
TCGA-67-6216	-1	0.5
TCGA-67-6217	2.19502	4.57895
TCGA-69-7760	1.01886	2.02632
TCGA-69-7761	-0.547488	0.684211
TCGA-69-7763	0.961526	1.94737
TCGA-69-7764	1.29123	2.44737
TCGA-69-7973	3.00946	8.05263
TCGA-69-7978	3.64992	12.5526
TCGA-69-7979	5.43419	43.2368
TCGA-69-7980	4.52851	23.0789
TCGA-69-8253	2.1867	4.55263
TCGA-69-8255	3.11402	8.65789
TCGA-69-A59K	3.86321	14.5526
TCGA-71-6725	0.584963	1.5
TCGA-71-8520	1.35199	2.55263
TCGA-73-4658	2.33703	5.05263
TCGA-73-4676	1.49354	2.81579
TCGA-73-7498	1.82889	3.55263
TCGA-73-7499	0.634716	1.55263
TCGA-73-A9RS	4.85405	28.9211
TCGA-78-7147	3.3557	10.2368
TCGA-78-7148	2.61005	6.10526
TCGA-78-7150	3.62244	12.3158
TCGA-78-7152	2.30666	4.94737
TCGA-78-7153	1.12711	2.18421
TCGA-78-7155	5.58812	48.1053
TCGA-78-7159	3.19916	9.18421
TCGA-78-7161	2.45251	5.47368
TCGA-78-7162	0.610053	1.52632
TCGA-78-7163	-0.788496	0.578947
TCGA-78-7166	2.77998	6.86842
TCGA-78-7535	2.40312	5.28947
TCGA-78-7537	2.10962	4.31579
TCGA-78-7539	3.73507	13.3158
TCGA-78-7540	-0.0384741	0.973684
TCGA-78-7542	3.47999	11.1579
TCGA-78-7633	1.82889	3.55263
TCGA-78-8640	4.33327	20.1579
TCGA-78-8648	-5.24793	0.0263158
TCGA-78-8655	1.71786	3.28947
TCGA-78-8660	2.67688	6.39474
TCGA-78-8662	5.18253	36.3158
TCGA-83-5908	2.57862	5.97368
TCGA-86-7711	2.62244	6.15789
TCGA-86-7713	2.28345	4.86842
TCGA-86-7953	0.395929	1.31579
TCGA-86-7955	3.23185	9.39474
TCGA-86-8054	2.76888	6.81579
TCGA-86-8055	-0.293731	0.815789
TCGA-86-8073	5.31336	39.7632
TCGA-86-8074	0.941897	1.92105
TCGA-86-8075	-0.0384741	0.973684
TCGA-86-8076	0.395929	1.31579
TCGA-86-8278	0.839535	1.78947
TCGA-86-8279	3.97848	15.7632
TCGA-86-8280	0	1
TCGA-86-8358	5.10191	34.3421
TCGA-86-8585	4.04899	16.5526
TCGA-86-8668	-0.247928	0.842105
TCGA-86-8669	1.90182	3.73684
TCGA-86-8671	-3.66297	0.0789474
TCGA-86-8672	3.04209	8.23684
TCGA-86-A456	3.06041	8.34211
TCGA-86-A4P7	0.0740006	1.05263
TCGA-91-6828	2.87619	7.34211
TCGA-91-6829	4.19709	18.3421
TCGA-91-6830	2.17834	4.52632
TCGA-91-6831	3.03284	8.18421
TCGA-91-6835	0.337035	1.26316
TCGA-91-6836	3.91446	15.0789
TCGA-91-6847	1.03747	2.05263
TCGA-91-7771	2.01886	4.05263
TCGA-91-8496	-0.49304	0.710526
TCGA-91-8497	0.275634	1.21053
TCGA-91-8499	3.3631	10.2895
TCGA-91-A4BC	3.41385	10.6579
TCGA-91-A4BD	-0.440573	0.736842
TCGA-93-7347	1.47999	2.78947
TCGA-93-7348	1.05585	2.07895
TCGA-93-8067	3.90182	14.9474
TCGA-93-A4JO	-0.604071	0.657895
TCGA-93-A4JQ	0.366782	1.28947
TCGA-95-7039	5.16676	35.9211
TCGA-95-7043	5.08969	34.0526
TCGA-95-7562	3.63472	12.4211
TCGA-95-7567	4.60382	24.3158
TCGA-95-7944	2.87619	7.34211
TCGA-95-7947	4.05357	16.6053
TCGA-95-7948	2	4
TCGA-95-8039	1.45251	2.73684
TCGA-95-8494	1.58496	3
TCGA-95-A4VN	3.31431	9.94737
TCGA-97-7546	3.03284	8.18421
TCGA-97-7547	2.25987	4.78947
TCGA-97-7552	-0.85561	0.552632
TCGA-97-7553	-0.341037	0.789474
TCGA-97-7937	3.74359	13.3947
TCGA-97-7938	3.53015	11.5526
TCGA-97-7941	1.12711	2.18421
TCGA-97-8172	2.86581	7.28947
TCGA-97-8174	2.0282	4.07895
TCGA-97-8175	-0.389947	0.763158
TCGA-97-8177	-0.724366	0.605263
TCGA-97-8179	2.43155	5.39474
TCGA-97-8552	-0.662965	0.631579
TCGA-97-A4LX	1.47999	2.78947
TCGA-97-A4M0	3.56906	11.8684
TCGA-97-A4M1	-0.118644	0.921053
TCGA-97-A4M2	-2.926	0.131579
TCGA-97-A4M3	2.56585	5.92105
TCGA-97-A4M5	1.68281	3.21053
TCGA-97-A4M6	-0.293731	0.815789
TCGA-97-A4M7	3	8
TCGA-99-8028	2.0282	4.07895
TCGA-99-8032	3.43857	10.8421
TCGA-99-AA5R	-2.926	0.131579
TCGA-J2-8192	0.796467	1.73684
TCGA-J2-8194	2.16993	4.5
TCGA-J2-A4AD	2.99525	7.97368
TCGA-J2-A4AE	0.0740006	1.05263
TCGA-J2-A4AG	0.839535	1.78947
TCGA-L4-A4E5	3.3887	10.4737
TCGA-L9-A443	2.82353	7.07895
TCGA-L9-A444	3.89928	14.9211
TCGA-L9-A50W	-0.293731	0.815789
TCGA-L9-A743	0.818162	1.76316
TCGA-L9-A7SV	5.59756	48.4211
TCGA-L9-A8F4	4.43331	21.6053
TCGA-MN-A4N1	3.70336	13.0263
TCGA-MN-A4N4	5.19812	36.7105
TCGA-MN-A4N5	3.74076	13.3684
TCGA-MP-A4SV	2.70044	6.5
TCGA-MP-A4SW	0.533432	1.44737
TCGA-MP-A4SY	1.63472	3.10526
TCGA-MP-A4T4	3.10522	8.60526
TCGA-MP-A4TA	3.19086	9.13158
TCGA-MP-A4TE	2.1008	4.28947
TCGA-MP-A4TF	3.56264	11.8158
TCGA-MP-A4TH	1.63472	3.10526
TCGA-MP-A4TI	2.074	4.21053
TCGA-MP-A4TJ	0.796467	1.73684
TCGA-MP-A4TK	3.13145	8.76316
TCGA-MP-A5C7	1.2115	2.31579
TCGA-NJ-A4YF	4.2156	18.5789
TCGA-NJ-A4YG	1.68281	3.21053
TCGA-NJ-A4YP	3.89162	14.8421
TCGA-NJ-A4YQ	4.85667	28.9737
TCGA-NJ-A55A	0.0740006	1.05263
TCGA-NJ-A55O	1.19502	2.28947
TCGA-NJ-A55R	2.90182	7.47368
TCGA-O1-A52J	2.34453	5.07895
TCGA-S2-AA1A	1.65896	3.15789
